# Supplementary material for: Effect of biological treatment used before harvesting and storage methods on the quality, health and microbial characteristics of unripe hazelnut in the husk (Corylus avellana L.)
Source: PeerJ. 2022 Jan 28;10:e12760. doi: 10.7717/peerj.12760 (PMC8802713; doi:10.7717/peerj.12760)
Supplement: Supplemental Information 1 [file peerj-10-12760-s001.xls]

## Sheet: Tab. 5.
Condition of storage	Combination of protect	Acremonium spp.	Pathogens	Cladosporium spp.	Alternaria spp.	Penicilium spp.	Yeast	Bacteria 1	Bacteria 2	Sum bacteria
CA	Control	32	0	156	7	4	292	200	3072	3272
CA	Control	14	0	104	2	0	176	136	2176	2312
CA	Control	16	4	0	9	1	120	160	4064	4224
NA	Control	1	0	0	8	324	232	16	784	800
NA	Control	0	4	0	25	252	852	128	528	656
NA	Control	0	1	0	34	268	776	136	712	848
MAP	Control	1	3	88	62	2	1376	336	1584	1920
MAP	Control	1	4	152	40	0	1168	480	1344	1824
MAP	Control	0	5	132	24	2	992	360	1064	1424
CA	Probiotics (EM)	6	1	116	10	1	896	724	2192	2916
CA	Probiotics (EM)	3	2	43	27	8	752	732	2208	2940
CA	Probiotics (EM)	2	2	132	23	7	848	416	2336	2752
NA	Probiotics (EM)	0	14	12	17	7	2208	736	3744	4480
NA	Probiotics (EM)	0	5	23	21	4	4704	1040	4632	5672
NA	Probiotics (EM)	0	7	30	21	6	3360	784	5120	5904
MAP	Probiotics (EM)	19	5	3	12	1	2944	544	6784	7328
MAP	Probiotics (EM)	32	5	33	24	3	4768	828	5696	6524
MAP	Probiotics (EM)	31	3	44	38	4	6368	672	7424	8096
CA	Polyversum ® WP	0	6	104	60	1	2976	72	7232	7304
CA	Polyversum ® WP	5	7	116	92	2	2770	160	6048	6208
CA	Polyversum ® WP	0	5	86	28	1	2112	184	7936	8120
MAP	Polyversum ® WP	6	3	316	7	1	2304	1072	2528	3600
MAP	Polyversum ® WP	12	2	360	42	6	2032	992	2960	3952
MAP	Polyversum ® WP	11	2	220	9	0	2240	960	3456	4416
NA	Polyversum ® WP	0	0	19	29	2	1696	136	2944	3080
NA	Polyversum ® WP	0	0	51	10	0	1808	368	3712	4080
NA	Polyversum ® WP	1	0	54	12	1	1936	112	4832	4944
			Pathogens		SE
		27	3.33333	3.08844	0.594371	2.11159	4.55508
CA		9	3	2.59808	0.866025	1.00294	4.99706	CA	3	****
NA		9	3.44444	4.74634	1.58211	-0.203918	7.09281	NA	3.44444	****
MAP		9	3.55556	1.23603	0.412011	2.60546	4.50565	MAP	3.55556	****
Control		9	2.33333	2.06155	0.687184	0.748684	3.91798	Control	2.33333	****
Probiotics (EM)		9	4.88889	3.91933	1.30644	1.87623	7.90155	Polyversum ® WP	2.77778	****
Polyversum ® WP		9	2.77778	2.68225	0.894082	0.716021	4.83953	Probiotics (EM)	4.88889		****
CA	Control	3	1.33333	2.3094	1.33333	-4.40354	7.0702	NA	Polyversum ® WP	0	****
CA	Probiotics (EM)	3	1.66667	0.57735	0.333333	0.232449	3.10088	CA	Control	1.33333	****	****
CA	Polyversum ® WP	3	6	1	0.57735	3.51586	8.48414	NA	Control	1.66667	****	****
NA	Control	3	1.66667	2.08167	1.20185	-3.50448	6.83781	CA	Probiotics (EM)	1.66667	****	****
NA	Probiotics (EM)	3	8.66667	4.72582	2.72845	-3.07291	20.4062	MAP	Polyversum ® WP	2.33333	****	****
NA	Polyversum ® WP	3	0	0	0	0	0	MAP	Control	4	****	****	****
MAP	Control	3	4	1	0.57735	1.51586	6.48414	MAP	Probiotics (EM)	4.33333	****	****	****
MAP	Probiotics (EM)	3	4.33333	1.1547	0.666667	1.4649	7.20177	CA	Polyversum ® WP	6		****	****
MAP	Polyversum ® WP	3	2.33333	0.57735	0.333333	0.899116	3.76755	NA	Probiotics (EM)	8.66667			****
			Alternaria spp.		SE
		27	25.6667	20.3167	3.90996	17.6296	33.7037
CA		9	28.6667	29.4618	9.82061	6.02029	51.313	NA	19.6667	****
NA		9	19.6667	8.80341	2.93447	12.8998	26.4336	MAP	28.6667	****
MAP		9	28.6667	18.3098	6.10328	14.5925	42.7409	CA	28.6667	****
Control		9	23.4444	19.5327	6.51091	8.43025	38.4586	Probiotics (EM)	21.4444	****
Probiotics (EM)		9	21.4444	8.32333	2.77444	15.0466	27.8423	Control	23.4444	****
Polyversum ® WP		9	32.1111	28.607	9.53567	10.1218	54.1004	Polyversum ® WP	32.1111	****
CA	Control	3	6	3.60555	2.08167	-2.95669	14.9567	CA	Control	6	****
CA	Probiotics (EM)	3	20	8.88819	5.1316	-2.0795	42.0795	NA	Polyversum ® WP	17	****	****
CA	Polyversum ® WP	3	60	32	18.4752	-19.4924	139.492	MAP	Polyversum ® WP	19.3333	****	****
NA	Control	3	22.3333	13.2035	7.62306	-10.4661	55.1327	NA	Probiotics (EM)	19.6667	****	****
NA	Probiotics (EM)	3	19.6667	2.3094	1.33333	13.9298	25.4035	CA	Probiotics (EM)	20	****	****
NA	Polyversum ® WP	3	17	10.4403	6.02771	-8.93516	42.9352	NA	Control	22.3333	****	****
MAP	Control	3	42	19.0788	11.0151	-5.39433	89.3943	MAP	Probiotics (EM)	24.6667	****	****
MAP	Probiotics (EM)	3	24.6667	13.0128	7.51295	-7.65896	56.9923	MAP	Control	42	****	****
MAP	Polyversum ® WP	3	19.3333	19.6554	11.348	-29.4933	68.16	CA	Polyversum ® WP	60		****
			Acremonium spp.		SE
		27	7.14815	10.4171	2.00477	3.02729	11.269
CA		9	8.66667	10.4523	3.48409	0.632339	16.701	NA	0.222222		****
NA		9	0.222222	0.440959	0.146986	-0.116729	0.561173	CA	8.66667	****
MAP		9	12.5556	12.4007	4.13357	3.02352	22.0876	MAP	12.5556	****
Control		9	7.22222	11.2336	3.74454	-1.41271	15.8572	Polyversum ® WP	3.88889	****
Probiotics (EM)		9	10.3333	13.3884	4.46281	0.0420767	20.6246	Control	7.22222	****	****
Polyversum ® WP		9	3.88889	4.88478	1.62826	0.134112	7.64367	Probiotics (EM)	10.3333		****
CA	Control	3	20.6667	9.86577	5.696	-3.84125	45.1746	NA	Probiotics (EM)	0	****
CA	Probiotics (EM)	3	3.66667	2.08167	1.20185	-1.50448	8.83781	NA	Polyversum ® WP	0.333333	****
CA	Polyversum ® WP	3	1.66667	2.88675	1.66667	-5.50442	8.83775	NA	Control	0.333333	****
NA	Control	3	0.333333	0.57735	0.333333	-1.10088	1.76755	MAP	Control	0.666667	****
NA	Probiotics (EM)	3	0	0	0	0	0	CA	Polyversum ® WP	1.66667	****
NA	Polyversum ® WP	3	0.333333	0.57735	0.333333	-1.10088	1.76755	CA	Probiotics (EM)	3.66667	****
MAP	Control	3	0.666667	0.57735	0.333333	-0.767551	2.10088	MAP	Polyversum ® WP	9.66667	****
MAP	Probiotics (EM)	3	27.3333	7.23418	4.17665	9.36264	45.304	CA	Control	20.6667		****
MAP	Polyversum ® WP	3	9.66667	3.21455	1.85592	1.68128	17.6521	MAP	Probiotics (EM)	27.3333		****
			Cladosporium spp.
		27	88.6667	92.7971	17.8588	51.9573	125.376
CA		9	95.2222	47.3597	15.7866	58.8183	131.626	NA	21	****
NA		9	21	20.8626	6.95422	4.96355	37.0364	CA	95.2222		****
MAP		9	149.778	126.126	42.0419	52.829	246.727	MAP	149.778			****
Control		9	70.2222	69.8602	23.2867	16.5229	123.922	Probiotics (EM)	48.4444	****
Probiotics (EM)		9	48.4444	45.0197	15.0066	13.8392	83.0497	Control	70.2222	****
Polyversum ® WP		9	147.333	122.494	40.8313	53.1762	241.49	Polyversum ® WP	147.333		****
CA	Control	3	86.6667	79.4313	45.8597	-110.652	283.985	NA	Control	0	****
CA	Probiotics (EM)	3	97	47.4447	27.3922	-20.8592	214.859	NA	Probiotics (EM)	21.6667	****	****
CA	Polyversum ® WP	3	102	15.0997	8.7178	64.4903	139.51	MAP	Probiotics (EM)	26.6667	****	****
NA	Control	3	0	0	0	0	0	NA	Polyversum ® WP	41.3333	****	****
NA	Probiotics (EM)	3	21.6667	9.07377	5.23874	-0.873832	44.2072	CA	Control	86.6667	****	****
NA	Polyversum ® WP	3	41.3333	19.3993	11.2002	-6.85723	89.5239	CA	Probiotics (EM)	97	****	****
MAP	Control	3	124	32.7414	18.9033	42.6658	205.334	CA	Polyversum ® WP	102	****	****
MAP	Probiotics (EM)	3	26.6667	21.2211	12.252	-26.0494	79.3827	MAP	Control	124		****
MAP	Polyversum ® WP	3	298.667	71.5914	41.3333	120.824	476.51	MAP	Polyversum ® WP	298.667			****
													****
			Penicillium spp.
		27	33.6296	89.8893	17.2992	-1.9294	69.1887
CA		9	2.77778	2.90593	0.968644	0.54408	5.01148	MAP	2.11111	****
NA		9	96	140.297	46.7657	-11.8418	203.842	CA	2.77778	****
MAP		9	2.11111	1.96497	0.65499	0.600701	3.62152	NA	96		****
Control		9	94.7778	141.193	47.0643	-13.7527	203.308	Polyversum ® WP	1.55556	****		****
Probiotics (EM)		9	4.55556	2.60342	0.867806	2.55439	6.55672	Probiotics (EM)	4.55556	****
Polyversum ® WP		9	1.55556	1.81046	0.603488	0.16391	2.9472	Control	94.7778		****
CA	Control	3	1.66667	2.08167	1.20185	-3.50448	6.83781	NA	Polyversum ® WP	1	****
CA	Probiotics (EM)	3	5.33333	3.78594	2.18581	-4.07146	14.7381	CA	Polyversum ® WP	1.33333	****
CA	Polyversum ® WP	3	1.33333	0.57735	0.333333	-0.100884	2.76755	MAP	Control	1.33333	****
NA	Control	3	281.333	37.8065	21.8276	187.417	375.25	CA	Control	1.66667	****
NA	Probiotics (EM)	3	5.66667	1.52753	0.881917	1.87208	9.46125	MAP	Polyversum ® WP	2.33333	****
NA	Polyversum ® WP	3	1	1	0.57735	-1.48414	3.48414	MAP	Probiotics (EM)	2.66667	****
MAP	Control	3	1.33333	1.1547	0.666667	-1.5351	4.20177	CA	Probiotics (EM)	5.33333	****
MAP	Probiotics (EM)	3	2.66667	1.52753	0.881917	-1.12792	6.46125	NA	Probiotics (EM)	5.66667	****
MAP	Polyversum ® WP	3	2.33333	3.21455	1.85592	-5.65205	10.3187	NA	Control	281.333		****
			Bacteria		SE
		27	4059.11	2235.77	430.275	3174.67
CA		9	4449.78	2186.07	728.688	2769.42	NA	3384.89		****
NA		9	3384.89	2131.53	710.51	1746.45	MAP	4342.67	****
MAP		9	4342.67	2479.9	826.632	2436.45	CA	4449.78	****
Control		9	1920	1201.38	400.46	996.538	Control	1920		****
Probiotics (EM)		9	5179.11	2006.8	668.934	3636.55	Polyversum ® WP	5078.22	****
Polyversum ® WP		9	5078.22	1745.79	581.931	3736.29	Probiotics (EM)	5179.11	****
CA	Control	3	3269.33	956.003	551.948	894.491	NA	Control	768				****
CA	Probiotics (EM)	3	2869.33	102.32	59.0743	2615.16	MAP	Control	1722.67		****		****
CA	Polyversum ® WP	3	7210.67	959.411	553.916	4827.36	CA	Probiotics (EM)	2869.33	****	****
NA	Control	3	768	99.92	57.6888	519.785	CA	Control	3269.33	****	****
NA	Probiotics (EM)	3	5352	764.031	441.114	3454.04	MAP	Polyversum ® WP	3989.33	****		****
NA	Polyversum ® WP	3	4034.67	932.827	538.568	1717.4	NA	Polyversum ® WP	4034.67	****		****
MAP	Control	3	1722.67	263.069	151.883	1069.17	NA	Probiotics (EM)	5352			****		****
MAP	Probiotics (EM)	3	7316	786.069	453.837	5363.3	CA	Polyversum ® WP	7210.67					****	****
MAP	Polyversum ® WP	3	3989.33	409.279	236.297	2972.63	MAP	Probiotics (EM)	7316						****
			Yeast		SE
		27	1952.07	1525.92	293.663	1348.44	2555.71
CA		9	1215.78	1112.71	370.904	360.471	2071.08	CA	1215.78	****
NA		9	1952.44	1381.1	460.365	890.84	3014.05	NA	1952.44	****	****
MAP		9	2688	1789.59	596.529	1312.4	4063.6	MAP	2688		****
Control		9	664.889	471.104	157.035	302.766	1027.01	Control	664.889		****
Probiotics (EM)		9	2983.11	2007.54	669.18	1439.98	4526.24	Polyversum ® WP	2208.22	****
Polyversum ® WP		9	2208.22	426.062	142.021	1880.72	2535.72	Probiotics (EM)	2983.11	****
CA	Control	3	196	87.7268	50.6491	-21.9256	413.926	CA	Control	196	****
CA	Probiotics (EM)	3	832	73.3212	42.332	649.86	1014.14	NA	Control	620	****	****
CA	Polyversum ® WP	3	2619.33	451.275	260.544	1498.3	3740.36	CA	Probiotics (EM)	832	****	****
NA	Control	3	620	338.16	195.237	-220.035	1460.04	MAP	Control	1178.67	****	****
NA	Probiotics (EM)	3	3424	1249.23	721.243	320.74	6527.26	NA	Polyversum ® WP	1813.33	****	****	****
NA	Polyversum ® WP	3	1813.33	120.089	69.3333	1515.02	2111.65	MAP	Polyversum ® WP	2192	****	****	****
MAP	Control	3	1178.67	192.222	110.979	701.161	1656.17	CA	Polyversum ® WP	2619.33		****	****	****
MAP	Probiotics (EM)	3	4693.33	1713.22	989.128	437.457	8949.21	NA	Probiotics (EM)	3424			****	****
MAP	Polyversum ® WP	3	2192	142.211	82.1056	1838.73	2545.27	MAP	Probiotics (EM)	4693.33				****
