# Supplementary material for: Effect of biological treatment used before harvesting and storage methods on the quality, health and microbial characteristics of unripe hazelnut in the husk (Corylus avellana L.)
Source: PeerJ. 2022 Jan 28;10:e12760. doi: 10.7717/peerj.12760 (PMC8802713; doi:10.7717/peerj.12760)
Supplement: Supplemental Information 2 [file peerj-10-12760-s002.xls]

## Sheet: Morphological features
year	period of storage	Combinations of protect	condition of storage	Weight of hazelnuts in the husk (g)	Weight of hazelnuts without husk (g)	Weight of hazelnut kernels (g)	Percentage of kernel (%)							Explanation
2017	1	A		7.8	5.4	2.7	50							period of storage
2017	1	A		7.4	4.9	2	40.8163							1 - after harvesting
2017	1	A		5.1	3.4	1.5	44.1176							2 - after harvesting + stored for 7 days at room temperature
2017	1	A		8.2	5.1	2.5	49.0196							3 - 2nd month after stored
2017	1	A		5.1	3.2	1.4	43.75							4 - 2nd month after stored + stored for 7 days at room temperature
2017	1	A		7.3	5.2	2.3	44.2308							5 - 3rd month after stored
2017	1	A		6.1	4.5	2.1	46.6667							6 - 3rd month after stored + stored for 7 days at room temperature
2017	1	A		6.9	4.6	2	43.4783
2017	1	A		7.7	5.6	2.9	51.7857							Combinations of protect
2017	1	A		6.5	4.7	2.3	48.9362							A - control
2017	1	A		7.8	5.4	2.7	50							B -Probiotics
2017	1	A		7.4	4.9	2	40.8163							C - Polyversum
2017	1	A		5.1	3.4	1.5	44.1176
2017	1	A		8.2	5.1	2.5	49.0196
2017	1	A		5.1	3.2	1.4	43.75							condition of storage
2017	1	A		7.3	5.2	2.3	44.2308							I - NA - control
2017	1	A		6.1	4.5	2.1	46.6667							II - KA (3:3)
2017	1	A		6.9	4.6	2	43.4783							III - Bag X-trend (storage normal)
2017	1	A		7.7	5.6	2.9	51.7857
2017	1	A		6.5	4.7	2.3	48.9362
2017	1	A		7.8	5.4	2.7	50
2017	1	A		7.4	4.9	2	40.8163
2017	1	A		5.1	3.4	1.5	44.1176
2017	1	A		8.2	5.1	2.5	49.0196
2017	1	A		5.1	3.2	1.4	43.75
2017	1	A		7.3	5.2	2.3	44.2308
2017	1	A		6.1	4.5	2.1	46.6667
2017	1	A		6.9	4.6	2	43.4783
2017	1	A		7.7	5.6	2.9	51.7857
2017	1	A		6.5	4.7	2.3	48.9362
2017	1	A		7.8	5.4	2.7	50
2017	1	A		7.4	4.9	2	40.8163
2017	1	A		5.1	3.4	1.5	44.1176
2017	1	A		8.2	5.1	2.5	49.0196
2017	1	A		5.1	3.2	1.4	43.75
2017	1	A		7.3	5.2	2.3	44.2308
2017	1	A		6.1	4.5	2.1	46.6667
2017	1	A		6.9	4.6	2	43.4783
2017	1	A		7.7	5.6	2.9	51.7857
2017	1	A		6.5	4.7	2.3	48.9362
2017	1	B		9.4	5.8	2.6	44.8276
2017	1	B		6.3	3.9	1.5	38.4615
2017	1	B		7.1	4.8	2.2	45.8333
2017	1	B		7.5	5.2	2.7	51.9231
2017	1	B		9.1	5.7	2	35.0877
2017	1	B		5.1	3.6	1.6	44.4444
2017	1	B		7.9	5	2.4	48
2017	1	B		9.9	6	2.7	45
2017	1	B		7.3	4.7	2.4	51.0638
2017	1	B		6.3	4.2	2.2	52.381
2017	1	B		9.4	5.8	2.6	44.8276
2017	1	B		6.3	3.9	1.5	38.4615
2017	1	B		7.1	4.8	2.2	45.8333
2017	1	B		7.5	5.2	2.7	51.9231
2017	1	B		9.1	5.7	2	35.0877
2017	1	B		5.1	3.6	1.6	44.4444
2017	1	B		7.9	5	2.4	48
2017	1	B		9.9	6	2.7	45
2017	1	B		7.3	4.7	2.4	51.0638
2017	1	B		6.3	4.2	2.2	52.381
2017	1	B		9.4	5.8	2.6	44.8276
2017	1	B		6.3	3.9	1.5	38.4615
2017	1	B		7.1	4.8	2.2	45.8333
2017	1	B		7.5	5.2	2.7	51.9231
2017	1	B		9.1	5.7	2	35.0877
2017	1	B		5.1	3.6	1.6	44.4444
2017	1	B		7.9	5	2.4	48
2017	1	B		9.9	6	2.7	45
2017	1	B		7.3	4.7	2.4	51.0638
2017	1	B		6.3	4.2	2.2	52.381
2017	1	B		9.4	5.8	2.6	44.8276
2017	1	B		6.3	3.9	1.5	38.4615
2017	1	B		7.1	4.8	2.2	45.8333
2017	1	B		7.5	5.2	2.7	51.9231
2017	1	B		9.1	5.7	2	35.0877
2017	1	B		5.1	3.6	1.6	44.4444
2017	1	B		7.9	5	2.4	48
2017	1	B		9.9	6	2.7	45
2017	1	B		7.3	4.7	2.4	51.0638
2017	1	B		6.3	4.2	2.2	52.381
2017	1	C		7.1	4.8	2.3	47.9167
2017	1	C		8.3	5.1	2.6	50.9804
2017	1	C		7.5	5.1	2.4	47.0588
2017	1	C		7.1	4.5	2.2	48.8889
2017	1	C		4.7	3.4	1.8	52.9412
2017	1	C		7.9	4.8	2.1	43.75
2017	1	C		5.8	4	1.8	45
2017	1	C		7.9	5.4	2.4	44.4444
2017	1	C		7	4.5	2	44.4444
2017	1	C		6	4	1.9	47.5
2017	1	C		7.1	4.8	2.3	47.9167
2017	1	C		8.3	5.1	2.6	50.9804
2017	1	C		7.5	5.1	2.4	47.0588
2017	1	C		7.1	4.5	2.2	48.8889
2017	1	C		4.7	3.4	1.8	52.9412
2017	1	C		7.9	4.8	2.1	43.75
2017	1	C		5.8	4	1.8	45
2017	1	C		7.9	5.4	2.4	44.4444
2017	1	C		7	4.5	2	44.4444
2017	1	C		6	4	1.9	47.5
2017	1	C		7.1	4.8	2.3	47.9167
2017	1	C		8.3	5.1	2.6	50.9804
2017	1	C		7.5	5.1	2.4	47.0588
2017	1	C		7.1	4.5	2.2	48.8889
2017	1	C		4.7	3.4	1.8	52.9412
2017	1	C		7.9	4.8	2.1	43.75
2017	1	C		5.8	4	1.8	45
2017	1	C		7.9	5.4	2.4	44.4444
2017	1	C		7	4.5	2	44.4444
2017	1	C		6	4	1.9	47.5
2017	1	C		7.1	4.8	2.3	47.9167
2017	1	C		8.3	5.1	2.6	50.9804
2017	1	C		7.5	5.1	2.4	47.0588
2017	1	C		7.1	4.5	2.2	48.8889
2017	1	C		4.7	3.4	1.8	52.9412
2017	1	C		7.9	4.8	2.1	43.75
2017	1	C		5.8	4	1.8	45
2017	1	C		7.9	5.4	2.4	44.4444
2017	1	C		7	4.5	2	44.4444																						strara masy
2017	1	C		6	4	1.9	47.5																						przed	po	strata
2017	2	A		5.6	4.6	2	43.4783																						8.1	5.6	2.5
2017	2	A		5.7	4.5	2	44.4444																						8.1	5.7	2.4
2017	2	A		3.9	3.2	1.6	50																						6.6	3.9	2.7
2017	2	A		3.8	3.2	1.6	50																						6.6	3.8	2.8
2017	2	A		3.5	2.9	1.4	48.2759																						5.9	3.5	2.4
2017	2	A		3.5	2.9	1.3	44.8276																						5.9	3.5	2.4
2017	2	A		5	4.1	1.9	46.3415																						7.5	5	2.5
2017	2	A		4.9	4	1.9	47.5																						7.5	4.9	2.6
2017	2	A		4.5	3.8	1.6	42.1053																						7.2	4.5	2.7
2017	2	A		4.5	3.8	1.6	42.1053																						7.1	4.5	2.6
2017	2	A		4.1	3.5	1.8	51.4286																						6.3	4.1	2.2
2017	2	A		4	3.4	1.3	38.2353																						6.5	4	2.5
2017	2	A		5.3	4.3	2.2	51.1628																						8.2	5.3	2.9
2017	2	A		4.8	4.1	1.7	41.4634																						7.8	4.8	3
2017	2	A		3.7	3.2	1.6	50																						5.6	3.7	1.9
2017	2	A		5.3	4.3	1.9	44.186																						9	5.3	3.7
2017	2	A		3.6	3	1.3	43.3333																						5.9	3.6	2.3
2017	2	A		3.8	3.1	1.3	41.9355																						6.2	3.8	2.4
2017	2	A		3.3	2.9	1.5	51.7241																						5	3.3	1.7
2017	2	A		3.3	2.9	1.5	51.7241																						5	3.3	1.7
2017	2	A		5.6	4.6	2	43.4783																						8.1	5.6	2.5
2017	2	A		5.7	4.5	2	44.4444																						8.1	5.7	2.4
2017	2	A		3.9	3.2	1.6	50																						6.6	3.9	2.7
2017	2	A		3.8	3.2	1.6	50																						6.6	3.8	2.8
2017	2	A		3.5	2.9	1.4	48.2759																						5.9	3.5	2.4
2017	2	A		3.5	2.9	1.3	44.8276																						5.9	3.5	2.4
2017	2	A		5	4.1	1.9	46.3415																						7.5	5	2.5
2017	2	A		4.9	4	1.9	47.5																						7.5	4.9	2.6
2017	2	A		4.5	3.8	1.6	42.1053																						7.2	4.5	2.7
2017	2	A		4.5	3.8	1.6	42.1053																						7.1	4.5	2.6
2017	2	A		4.1	3.5	1.8	51.4286																						6.3	4.1	2.2
2017	2	A		4	3.4	1.3	38.2353																						6.5	4	2.5
2017	2	A		5.3	4.3	2.2	51.1628																						8.2	5.3	2.9
2017	2	A		4.8	4.1	1.7	41.4634																						7.8	4.8	3
2017	2	A		3.7	3.2	1.6	50																						5.6	3.7	1.9
2017	2	A		5.3	4.3	1.9	44.186																						9	5.3	3.7
2017	2	A		3.6	3	1.3	43.3333																						5.9	3.6	2.3
2017	2	A		3.8	3.1	1.3	41.9355																						6.2	3.8	2.4
2017	2	A		3.3	2.9	1.5	51.7241																						5	3.3	1.7
2017	2	A		3.3	2.9	1.5	51.7241																						5	3.3	1.7
2017	2	B		5.6	4.7	2.1	44.6809																						8	5.6	2.4
2017	2	B		5.7	4.6	2	43.4783																						8	5.7	2.3
2017	2	B		4	3.3	1.4	42.4242																						5.5	4	1.5
2017	2	B		3.9	3.2	1.3	40.625																						5.5	3.9	1.6
2017	2	B		4.8	4.1	2.1	51.2195																						6.7	4.8	1.9
2017	2	B		4.8	4	2	50																						6.6	4.8	1.8
2017	2	B		5.1	4	1.7	42.5																						7.6	5.1	2.5
2017	2	B		5	4	1.6	40																						7.6	5	2.6
2017	2	B		3.3	2.8	1.1	39.2857																						5	3.3	1.7
2017	2	B		3.2	2.7	1.1	40.7407																						5	3.2	1.8
2017	2	B		5.2	4.3	1.8	41.8605																						7.8	5.2	2.6
2017	2	B		4.1	3.6	1	27.7778																						6.8	4.1	2.7
2017	2	B		4.3	3.6	1.5	41.6667																						6.8	4.3	2.5
2017	2	B		4.5	3.9	1.6	41.0256																						7.2	4.5	2.7
2017	2	B		4.3	3.6	1.3	36.1111																						6.5	4.3	2.2
2017	2	B		4.1	3.5	1.7	48.5714																						6.4	4.1	2.3
2017	2	B		4.1	3.6	1.7	47.2222																						6.3	4.1	2.2
2017	2	B		4	3.5	1.7	48.5714																						6.1	4	2.1
2017	2	B		4.1	3.7	1.8	48.6486																						6.3	4.1	2.2
2017	2	B		5.7	4.7	2.1	44.6809																						8.8	5.7	3.1
2017	2	B		5.6	4.7	2.1	44.6809																						8	5.6	2.4
2017	2	B		5.7	4.6	2	43.4783																						8	5.7	2.3
2017	2	B		4	3.3	1.4	42.4242																						5.5	4	1.5
2017	2	B		3.9	3.2	1.3	40.625																						5.5	3.9	1.6
2017	2	B		4.8	4.1	2.1	51.2195																						6.7	4.8	1.9
2017	2	B		4.8	4	2	50																						6.6	4.8	1.8
2017	2	B		5.1	4	1.7	42.5																						7.6	5.1	2.5
2017	2	B		5	4	1.6	40																						7.6	5	2.6
2017	2	B		3.3	2.8	1.1	39.2857																						5	3.3	1.7
2017	2	B		3.2	2.7	1.1	40.7407																						5	3.2	1.8
2017	2	B		5.2	4.3	1.8	41.8605																						7.8	5.2	2.6
2017	2	B		4.1	3.6	1	27.7778																						6.8	4.1	2.7
2017	2	B		4.3	3.6	1.5	41.6667																						6.8	4.3	2.5
2017	2	B		4.5	3.9	1.6	41.0256																						7.2	4.5	2.7
2017	2	B		4.3	3.6	1.3	36.1111																						6.5	4.3	2.2
2017	2	B		4.1	3.5	1.7	48.5714																						6.4	4.1	2.3
2017	2	B		4.1	3.6	1.7	47.2222																						6.3	4.1	2.2
2017	2	B		4	3.5	1.7	48.5714																						6.1	4	2.1
2017	2	B		4.1	3.7	1.8	48.6486																						6.3	4.1	2.2
2017	2	B		5.7	4.7	2.1	44.6809																						8.8	5.7	3.1
2017	2	C		7.3	5.1	2.3	45.098																						8.8	7.3	1.5
2017	2	C		7.3	5	2.2	44																						8.7	7.3	1.4
2017	2	C		6	4.7	2.5	53.1915																						7.7	6	1.7
2017	2	C		6	4.7	2.4	51.0638																						7.6	6	1.6
2017	2	C		6.4	4.9	2	40.8163																						8.9	6.4	2.5
2017	2	C		6.3	4.8	1.9	39.5833																						8.8	6.3	2.5
2017	2	C		3.6	2.9	1.6	55.1724																						4.5	3.6	0.9
2017	2	C		3.5	2.8	1.5	53.5714																						4.5	3.5	1
2017	2	C		2.9	2.4	1.2	50																						3.7	2.9	0.8
2017	2	C		2.8	2.3	1.2	52.1739																						3.6	2.8	0.8
2017	2	C		5.8	4.7	2.3	48.9362																						8.1	5.8	2.3
2017	2	C		4.5	3	1.3	43.3333																						4.7	4.5	0.2
2017	2	C		6.2	4.7	2.1	44.6809																						8.3	6.2	2.1
2017	2	C		4.6	3.8	1.9	50																						6.1	4.6	1.5
2017	2	C		4.6	3.8	1.9	50																						6.1	4.6	1.5
2017	2	C		4.3	3.6	1.9	52.7778																						5.7	4.3	1.4
2017	2	C		4.9	3.8	1.8	47.3684																						6.7	4.9	1.8
2017	2	C		4.6	3.5	1.9	54.2857																						5.8	4.6	1.2
2017	2	C		3.8	3.6	1.8	50																						5.5	3.8	1.7
2017	2	C		3.8	3.6	1.8	50																						5.5	3.8	1.7
2017	2	C		7.3	5.1	2.3	45.098																						8.8	7.3	1.5
2017	2	C		7.3	5	2.2	44																						8.7	7.3	1.4
2017	2	C		6	4.7	2.5	53.1915																						7.7	6	1.7
2017	2	C		6	4.7	2.4	51.0638																						7.6	6	1.6
2017	2	C		6.4	4.9	2	40.8163																						8.9	6.4	2.5
2017	2	C		6.3	4.8	1.9	39.5833																						8.8	6.3	2.5
2017	2	C		3.6	2.9	1.6	55.1724																						4.5	3.6	0.9
2017	2	C		3.5	2.8	1.5	53.5714																						4.5	3.5	1
2017	2	C		2.9	2.4	1.2	50																						3.7	2.9	0.8
2017	2	C		2.8	2.3	1.2	52.1739																						3.6	2.8	0.8
2017	2	C		5.8	4.7	2.3	48.9362																						8.1	5.8	2.3
2017	2	C		4.5	3	1.3	43.3333																						4.7	4.5	0.2
2017	2	C		6.2	4.7	2.1	44.6809																						8.3	6.2	2.1
2017	2	C		4.6	3.8	1.9	50																						6.1	4.6	1.5
2017	2	C		4.6	3.8	1.9	50																						6.1	4.6	1.5
2017	2	C		4.3	3.6	1.9	52.7778																						5.7	4.3	1.4
2017	2	C		4.9	3.8	1.8	47.3684																						6.7	4.9	1.8
2017	2	C		4.6	3.5	1.9	54.2857																						5.8	4.6	1.2
2017	2	C		3.8	3.6	1.8	50																						5.5	3.8	1.7
2017	2	C		3.8	3.6	1.8	50																						5.5	3.8	1.7
2017	3	A	I	3.9	3.1	1.3	41.9355																						5.6	3.9	1.7
2017	3	A	I	3.8	3	1.3	43.3333																						5.6	3.8	1.8
2017	3	A	I	4.2	3.4	1.6	47.0588																						5.8	4.2	1.6
2017	3	A	I	4.2	3.4	1.6	47.0588																						5.8	4.2	1.6
2017	3	A	I	4.3	3.4	1.5	44.1176																						6.2	4.3	1.9
2017	3	A	I	4.3	3.4	1.4	41.1765																						6.1	4.3	1.8
2017	3	A	I	3.8	3.1	1.4	45.1613																						5.3	3.8	1.5
2017	3	A	I	3.7	3	1.4	46.6667																						5.2	3.7	1.5
2017	3	A	I	3.8	3.1	1.3	41.9355																						5.7	3.8	1.9
2017	3	A	I	3.8	3.1	1.3	41.9355																						5.7	3.8	1.9
2017	3	A	I	4.9	3.8	1.7	44.7368																						7.2	4.9	2.3
2017	3	A	I	5.5	4.3	1.9	44.186																						7.7	5.5	2.2
2017	3	A	I	4	3.2	1.4	43.75																						6.1	4	2.1
2017	3	A	I	5.5	4.1	2	48.7805																						7.2	5.5	1.7
2017	3	A	I	2.9	2.2	0.8	36.3636																						4.3	2.9	1.4
2017	3	A	I	3.7	3.1	1.4	45.1613																						5.6	3.7	1.9
2017	3	A	I	4.9	4	1.9	47.5																						6.8	4.9	1.9
2017	3	A	I	4.1	3.3	1.6	48.4848																						5.9	4.1	1.8
2017	3	A	I	4	3.2	1.4	43.75																						6	4	2
2017	3	A	I	4	3.2	1.4	43.75																						6.2	4	2.2
2017	3	A	I	3.1	2.4	0.9	37.5																						4.7	3.1	1.6
2017	3	A	I	3	2.4	0.9	37.5																						4.6	3	1.6
2017	3	A	I	4.1	3.6	1.7	47.2222																						6.4	4.1	2.3
2017	3	A	I	3.8	3.1	1	32.2581																						6.3	3.8	2.5
2017	3	A	I	5.4	4.4	2.1	47.7273																						7.3	5.4	1.9
2017	3	A	I	5.4	4.4	2.1	47.7273																						7.3	5.4	1.9
2017	3	A	I	4.7	3.7	1.5	40.5405																						6.5	4.7	1.8
2017	3	A	I	4.6	3.7	1.5	40.5405																						6.4	4.6	1.8
2017	3	A	I	4.5	3.6	1.8	50																						5	4.5	0.5
2017	3	A	I	4.4	3.5	1.8	51.4286																						5	4.4	0.6
2017	3	A	I	4.4	3.7	1.7	45.9459																						6.3	4.4	1.9
2017	3	A	I	3.8	3.3	1.6	48.4848																						5.3	3.8	1.5
2017	3	A	I	3.3	2.7	1.2	44.4444																						4.6	3.3	1.3
2017	3	A	I	3.9	3.2	1.5	46.875																						5.9	3.9	2
2017	3	A	I	4.4	3.4	1.6	47.0588																						6.3	4.4	1.9
2017	3	A	I	4	3.2	1.2	37.5																						6	4	2
2017	3	A	I	4	3.2	1.4	43.75																						6	4	2
2017	3	A	I	4.4	3.5	1.3	37.1429																						6.5	4.4	2.1
2017	3	A	I	3.9	3.2	1.5	46.875																						5.8	3.9	1.9
2017	3	A	I	4.2	3.5	1.5	42.8571																						6.7	4.2	2.5
2017	3	A	II	7.6	5.1	2.4	47.0588																						7.9	7.6	0.3
2017	3	A	II	7.7	5.1	2.5	49.0196																						8	7.7	0.3
2017	3	A	II	5.8	4.2	2.3	54.7619																						5.9	5.8	0.1
2017	3	A	II	6.6	4.6	2.2	47.8261																						6.9	6.6	0.3
2017	3	A	II	7.6	4.7	2.1	44.6809																						7.8	7.6	0.2
2017	3	A	II	5.3	3.6	1.8	50																						5.4	5.3	0.1
2017	3	A	II	7.9	5.1	2.4	47.0588																						8.1	7.9	0.2
2017	3	A	II	8.6	5.1	2.4	47.0588																						8.7	8.6	0.1
2017	3	A	II	7.8	4.7	2.2	46.8085																						7.9	7.8	0.1
2017	3	A	II	8.6	5	2.2	44																						8.7	8.6	0.1
2017	3	A	II	7.9	5.3	2.6	49.0566																						8.2	7.9	0.3
2017	3	A	II	7.9	5.2	2.5	48.0769																						8.2	7.9	0.3
2017	3	A	II	8.6	5.4	2.5	46.2963																						8.9	8.6	0.3
2017	3	A	II	6.3	4.4	2.3	52.2727																						6.5	6.3	0.2
2017	3	A	II	6.3	4.4	2.2	50																						6.4	6.3	0.1
2017	3	A	II	7.8	5.2	2.6	50																						8	7.8	0.2
2017	3	A	II	8.7	5.4	2.5	46.2963																						8.9	8.7	0.2
2017	3	A	II	7.4	4.7	2.2	46.8085																						7.8	7.4	0.4
2017	3	A	II	6.4	4.4	2.1	47.7273																						6.7	6.4	0.3
2017	3	A	II	6.4	4.3	2	46.5116																						6.6	6.4	0.2
2017	3	A	II	5	3.6	1.9	52.7778																						5.1	5	0.1
2017	3	A	II	4.9	3.5	1.8	51.4286																						5	4.9	0.1
2017	3	A	II	7.8	5.3	2.6	49.0566																						8	7.8	0.2
2017	3	A	II	7.8	5.3	2.6	49.0566																						8	7.8	0.2
2017	3	A	II	5.9	4	1.7	42.5																						6.1	5.9	0.2
2017	3	A	II	5.9	3.9	1.7	43.5897																						6.1	5.9	0.2
2017	3	A	II	6.7	4.5	2.2	48.8889																						6.9	6.7	0.2
2017	3	A	II	6.6	4.5	2.1	46.6667																						6.9	6.6	0.3
2017	3	A	II	7.7	5.1	2.2	43.1373																						8.1	7.7	0.4
2017	3	A	II	6.1	4	1.9	47.5																						6.2	6.1	0.1
2017	3	A	II	5.3	3.9	2	51.2821																						5.5	5.3	0.2
2017	3	A	II	6.6	4.4	2.2	50																						6.7	6.6	0.1
2017	3	A	II	7.6	5	2.3	46																						7.8	7.6	0.2
2017	3	A	II	7.7	5.4	2.6	48.1481																						7.8	7.7	0.1
2017	3	A	II	5.5	3.7	2	54.0541																						5.7	5.5	0.2
2017	3	A	II	6.8	4.6	2.3	50																						7	6.8	0.2
2017	3	A	II	6.4	4.6	2.5	54.3478																						6.5	6.4	0.1
2017	3	A	II	5.7	3.9	2	51.2821																						5.9	5.7	0.2
2017	3	A	II	6.7	4.2	2.4	57.1429																						6.9	6.7	0.2
2017	3	A	II	6.7	4.4	1.9	43.1818																						7	6.7	0.3
2017	3	A	III	6.2	4.3	2.1	48.8372																						6.3	6.2	0.1
2017	3	A	III	6.2	4.2	2.1	50																						6.3	6.2	0.1
2017	3	A	III	6.1	4.2	2.2	52.381																						6.1	6.1	0
2017	3	A	III	6	4.1	2.2	53.6585																						6.1	6	0.1
2017	3	A	III	7.6	5.2	2.6	50																						7.7	7.6	0.1
2017	3	A	III	7.6	5.1	2.6	50.9804																						7.7	7.6	0.1
2017	3	A	III	6.1	4.5	2	44.4444																						6.2	6.1	0.1
2017	3	A	III	6	4.5	2	44.4444																						6.1	6	0.1
2017	3	A	III	7.4	5.1	2.1	41.1765																						7.6	7.4	0.2
2017	3	A	III	7.4	5	2.1	42																						7.6	7.4	0.2
2017	3	A	III	5.1	3.4	1.6	47.0588																						5.2	5.1	0.1
2017	3	A	III	5.1	3.4	1.6	47.0588																						5.9	5.1	0.8
2017	3	A	III	6.7	4.1	1.8	43.9024																						6.9	6.7	0.2
2017	3	A	III	6.3	4	2	50																						6.5	6.3	0.2
2017	3	A	III	8.2	5.3	2.7	50.9434																						8.4	8.2	0.2
2017	3	A	III	5.8	4.1	2	48.7805																						6	5.8	0.2
2017	3	A	III	7.5	4.8	2.4	50																						7.6	7.5	0.1
2017	3	A	III	6.6	4.6	2.4	52.1739																						6.8	6.6	0.2
2017	3	A	III	6.5	4.7	2.4	51.0638																						6.8	6.5	0.3
2017	3	A	III	5.2	3.7	1.8	48.6486																						5.3	5.2	0.1
2017	3	A	III	7.1	4.5	1.9	42.2222																						7.3	7.1	0.2
2017	3	A	III	7	4.4	1.9	43.1818																						7.2	7	0.2
2017	3	A	III	5.7	4.2	2.4	57.1429																						5.8	5.7	0.1
2017	3	A	III	5.7	4.2	2.3	54.7619																						5.7	5.7	0
2017	3	A	III	8	5.2	2	38.4615																						8.2	8	0.2
2017	3	A	III	8	5.1	2	39.2157																						8.2	8	0.2
2017	3	A	III	7.4	4.8	2.1	43.75																						7.5	7.4	0.1
2017	3	A	III	7.3	4.7	2.1	44.6809																						7.4	7.3	0.1
2017	3	A	III	5.9	3.3	2.3	69.697																						6	5.9	0.1
2017	3	A	III	5.9	3.2	2.2	68.75																						6	5.9	0.1
2017	3	A	III	6.1	4.5	2.4	53.3333																						6.3	6.1	0.2
2017	3	A	III	6.5	4.5	2.2	48.8889																						6.6	6.5	0.1
2017	3	A	III	8.1	5.3	2.7	50.9434																						8.2	8.1	0.1
2017	3	A	III	7.7	5.6	3	53.5714																						7.9	7.7	0.2
2017	3	A	III	5.7	3.8	2	52.6316																						5.8	5.7	0.1
2017	3	A	III	7	5.1	2.4	47.0588																						7.2	7	0.2
2017	3	A	III	7.1	4.7	2.4	51.0638																						7.2	7.1	0.1
2017	3	A	III	7.2	5	2.4	48																						7.4	7.2	0.2
2017	3	A	III	6.8	4.6	2.2	47.8261																						6.9	6.8	0.1
2017	3	A	III	6.2	4.2	1.7	40.4762																						6.4	6.2	0.2
2017	3	B	I	5.7	4.5	1.8	40																						7.7	5.7	2
2017	3	B	I	5.6	4.4	1.8	40.9091																						7.8	5.6	2.2
2017	3	B	I	6	4.8	2.3	47.9167																						8.1	6	2.1
2017	3	B	I	5.9	4.7	2.2	46.8085																						8	5.9	2.1
2017	3	B	I	4.4	3.7	1.8	48.6486																						6.5	4.4	2.1
2017	3	B	I	4.4	3.6	1.8	50																						6.4	4.4	2
2017	3	B	I	3.9	3.3	1.6	48.4848																						5.5	3.9	1.6
2017	3	B	I	3.8	3.3	1.5	45.4545																						5.5	3.8	1.7
2017	3	B	I	4.2	3.4	1.5	44.1176																						5.6	4.2	1.4
2017	3	B	I	4.1	3.3	1.4	42.4242																						5.5	4.1	1.4
2017	3	B	I	5.8	4.5	1.8	40																						8	5.8	2.2
2017	3	B	I	6	4.3	1.7	39.5349																						8.8	6	2.8
2017	3	B	I	5.4	4.2	2.2	52.381																						7.7	5.4	2.3
2017	3	B	I	4.3	3.6	1.6	44.4444																						6.2	4.3	1.9
2017	3	B	I	4.1	3.3	1.2	36.3636																						6.1	4.1	2
2017	3	B	I	3.8	3.1	1.1	35.4839																						5.3	3.8	1.5
2017	3	B	I	4.3	3.5	1.7	48.5714																						5.9	4.3	1.6
2017	3	B	I	5.6	4.5	2.1	46.6667																						7.6	5.6	2
2017	3	B	I	4.9	3.7	1.2	32.4324																						7.5	4.9	2.6
2017	3	B	I	6	4.7	2	42.5532																						8.3	6	2.3
2017	3	B	I	6.8	5	2.2	44																						8.3	6.8	1.5
2017	3	B	I	6.7	4.9	2.1	42.8571																						8.3	6.7	1.6
2017	3	B	I	5.5	4.1	1.8	43.9024																						6.9	5.5	1.4
2017	3	B	I	5.5	4.1	1.8	43.9024																						6.9	5.5	1.4
2017	3	B	I	6.2	4.5	2.2	48.8889																						8	6.2	1.8
2017	3	B	I	6.2	4.5	2.2	48.8889																						7.9	6.2	1.7
2017	3	B	I	4.1	3.4	1.4	41.1765																						5.4	4.1	1.3
2017	3	B	I	4.1	3.3	1.3	39.3939																						5.4	4.1	1.3
2017	3	B	I	5.8	4.3	1.8	41.8605																						8.1	5.8	2.3
2017	3	B	I	5.7	4.3	1.8	41.8605																						8	5.7	2.3
2017	3	B	I	6.4	5	1.9	38																						8.6	6.4	2.2
2017	3	B	I	5.4	4.5	2	44.4444																						7.8	5.4	2.4
2017	3	B	I	5	3.7	1.8	48.6486																						6.7	5	1.7
2017	3	B	I	3.9	3	1.3	43.3333																						5.7	3.9	1.8
2017	3	B	I	4	3.3	1.3	39.3939																						5.8	4	1.8
2017	3	B	I	4.6	3.9	1.6	41.0256																						6.7	4.6	2.1
2017	3	B	I	4.5	3.5	1.6	45.7143																						6.6	4.5	2.1
2017	3	B	I	4.7	3.7	1.7	45.9459																						6	4.7	1.3
2017	3	B	I	5.3	4.1	2	48.7805																						7.1	5.3	1.8
2017	3	B	I	5	4	1.8	45																						7	5	2
2017	3	B	II	6.7	4.7	2.3	48.9362																						6.9	6.7	0.2
2017	3	B	II	6.7	4.6	2.3	50																						6.8	6.7	0.1
2017	3	B	II	6.8	4.5	2.1	46.6667																						6.9	6.8	0.1
2017	3	B	II	6.8	4.5	2.1	46.6667																						6.9	6.8	0.1
2017	3	B	II	9.2	6.1	2.7	44.2623																						9.5	9.2	0.3
2017	3	B	II	9.1	6	2.7	45																						9.4	9.1	0.3
2017	3	B	II	5.9	4	2	50																						6	5.9	0.1
2017	3	B	II	5.8	4	2	50																						5.9	5.8	0.1
2017	3	B	II	5.3	3.7	1.8	48.6486																						5.9	5.3	0.6
2017	3	B	II	5.2	3.7	1.7	45.9459																						5.8	5.2	0.6
2017	3	B	II	9.5	5.3	2	37.7358																						9.5	9.5	0
2017	3	B	II	8	4.5	1.4	31.1111																						8.1	8	0.1
2017	3	B	II	10.1	6.5	3	46.1538																						10.4	10.1	0.3
2017	3	B	II	8.6	5.8	2.6	44.8276																						8.6	8.6	0
2017	3	B	II	6.7	4.7	2.2	46.8085																						6.8	6.7	0.1
2017	3	B	II	5.9	3.8	1.8	47.3684																						5.9	5.9	0
2017	3	B	II	6.6	4.5	2	44.4444																						6.6	6.6	0
2017	3	B	II	9.1	5.8	2.7	46.5517																						9.3	9.1	0.2
2017	3	B	II	7.7	5.1	2.5	49.0196																						7.8	7.7	0.1
2017	3	B	II	5.6	4	1.9	47.5																						5.7	5.6	0.1
2017	3	B	II	6.8	4.5	2.4	53.3333																						6.9	6.8	0.1
2017	3	B	II	6.7	4.5	2.4	53.3333																						6.9	6.7	0.2
2017	3	B	II	6.4	4.2	1.9	45.2381																						6.5	6.4	0.1
2017	3	B	II	6.4	4.1	1.9	46.3415																						6.5	6.4	0.1
2017	3	B	II	6.7	3.9	2	51.2821																						6.7	6.7	0
2017	3	B	II	6.7	3.9	1.9	48.7179																						6.7	6.7	0
2017	3	B	II	6.4	4.2	1.9	45.2381																						6.5	6.4	0.1
2017	3	B	II	6.3	4.2	1.9	45.2381																						6.4	6.3	0.1
2017	3	B	II	5.9	4.3	2.2	51.1628																						6.1	5.9	0.2
2017	3	B	II	5.9	4.2	2.1	50																						6	5.9	0.1
2017	3	B	II	7	4.5	1.9	42.2222																						7.1	7	0.1
2017	3	B	II	6.9	4.6	2.2	47.8261																						7	6.9	0.1
2017	3	B	II	6.8	4.4	2.2	50																						7	6.8	0.2
2017	3	B	II	6.2	4.6	2.4	52.1739																						6.5	6.2	0.3
2017	3	B	II	5.8	4	1.8	45																						5.9	5.8	0.1
2017	3	B	II	6.8	4.7	2.4	51.0638																						7	6.8	0.2
2017	3	B	II	6.2	4	1.6	40																						6.4	6.2	0.2
2017	3	B	II	6.1	4.3	2.2	51.1628																						6.2	6.1	0.1
2017	3	B	II	5.4	3.9	1.9	48.7179																						5.5	5.4	0.1
2017	3	B	II	5.8	3.7	1.2	32.4324																						6	5.8	0.2
2017	3	B	III	4.9	3.5	1.8	51.4286																						5	4.9	0.1
2017	3	B	III	4.9	3.5	1.8	51.4286																						4.9	4.9	0
2017	3	B	III	6.3	4	1.6	40																						6.4	6.3	0.1
2017	3	B	III	6.3	4	1.5	37.5																						6.3	6.3	0
2017	3	B	III	7.9	5	2.4	48																						8.1	7.9	0.2
2017	3	B	III	7.9	4.9	2.4	48.9796																						8	7.9	0.1
2017	3	B	III	8.4	5.4	2.6	48.1481																						8.4	8.4	0
2017	3	B	III	8.4	5.3	2.5	47.1698																						8.4	8.4	0
2017	3	B	III	5.7	3.8	1.6	42.1053																						5.7	5.7	0
2017	3	B	III	5.7	3.7	1.6	43.2432																						5.7	5.7	0
2017	3	B	III	6.5	4	1.8	45																						6.6	6.5	0.1
2017	3	B	III	9.4	5.6	2.1	37.5																						9.3	9.4	-0.1
2017	3	B	III	5.4	4	2.1	52.5																						5.5	5.4	0.1
2017	3	B	III	8.2	5.2	2.4	46.1538																						8.3	8.2	0.1
2017	3	B	III	6.8	4.1	1.7	41.4634																						6.8	6.8	0
2017	3	B	III	6.8	4.1	1.7	41.4634																						6.8	6.8	0
2017	3	B	III	8.7	5.6	2.6	46.4286																						8.7	8.7	0
2017	3	B	III	8.2	5	2	40																						8.4	8.2	0.2
2017	3	B	III	5.2	3.7	1.7	45.9459																						5.3	5.2	0.1
2017	3	B	III	5.4	4	1.9	47.5																						5.4	5.4	0
2017	3	B	III	8.2	5.2	2.3	44.2308																						8.4	8.2	0.2
2017	3	B	III	8.2	5.1	2.2	43.1373																						8.6	8.2	0.4
2017	3	B	III	5.6	3.8	1.7	44.7368																						5.6	5.6	0
2017	3	B	III	5.5	3.7	1.6	43.2432																						5.6	5.5	0.1
2017	3	B	III	6.9	4.5	2	44.4444																						7.1	6.9	0.2
2017	3	B	III	6.8	4.4	1.9	43.1818																						7	6.8	0.2
2017	3	B	III	5.7	3.7	1.5	40.5405																						5.8	5.7	0.1
2017	3	B	III	5.7	3.6	1.5	41.6667																						5.7	5.7	0
2017	3	B	III	6.2	4.1	1.5	36.5854																						6.3	6.2	0.1
2017	3	B	III	6.1	4	1.5	37.5																						6.2	6.1	0.1
2017	3	B	III	7.7	4.9	2.4	48.9796																						7.8	7.7	0.1
2017	3	B	III	7.4	4.3	1.9	44.186																						7.3	7.4	-0.1
2017	3	B	III	7.4	4.9	2	40.8163																						7.2	7.4	-0.2
2017	3	B	III	7.4	4.9	2	40.8163																						7.2	7.4	-0.2
2017	3	B	III	7.7	5	2	40																						7.9	7.7	0.2
2017	3	B	III	5.1	3.3	1.5	45.4545																						5.1	5.1	0
2017	3	B	III	4.7	3.6	1.8	50																						4.7	4.7	0
2017	3	B	III	4.7	3.6	1.8	50																						4.7	4.7	0
2017	3	B	III	5.1	3.8	2	52.6316																						5.1	5.1	0
2017	3	B	III	6.8	4.3	2.1	48.8372																						6.8	6.8	0
2017	3	C	I	5.7	4.7	2.3	48.9362																						6.6	5.7	0.9
2017	3	C	I	5.7	4.6	2.2	47.8261																						6.5	5.7	0.8
2017	3	C	I	4.6	3.5	1.6	45.7143																						6.1	4.6	1.5
2017	3	C	I	4.5	3.5	1.6	45.7143																						6	4.5	1.5
2017	3	C	I	5	4.1	1.7	41.4634																						6.9	5	1.9
2017	3	C	I	5	4.1	1.7	41.4634																						6.9	5	1.9
2017	3	C	I	5	4.1	1.7	41.4634																						7.2	5	2.2
2017	3	C	I	5	4.1	1.7	41.4634																						7.2	5	2.2
2017	3	C	I	4.2	3.3	1.4	42.4242																						6.5	4.2	2.3
2017	3	C	I	4.2	3.3	1.3	39.3939																						6.5	4.2	2.3
2017	3	C	I	4.8	3.8	1.7	44.7368																						6.5	4.8	1.7
2017	3	C	I	4.1	3.4	1.3	38.2353																						5.9	4.1	1.8
2017	3	C	I	6.1	4.9	2	40.8163																						7.9	6.1	1.8
2017	3	C	I	5.9	4.4	2.2	50																						8.2	5.9	2.3
2017	3	C	I	4.2	3.3	1.6	48.4848																						6.2	4.2	2
2017	3	C	I	5.3	4.2	1.9	45.2381																						8.4	5.3	3.1
2017	3	C	I	6	4.6	1.8	39.1304																						9.3	6	3.3
2017	3	C	I	6	4.6	1.8	39.1304																						10	6	4
2017	3	C	I	2.6	2.1	1.1	52.381																						4.9	2.6	2.3
2017	3	C	I	2.6	2.1	1.1	52.381																						6.3	2.6	3.7
2017	3	C	I	4.2	3.5	1.8	51.4286																						6.5	4.2	2.3
2017	3	C	I	4.2	3.4	1.7	50																						6.5	4.2	2.3
2017	3	C	I	4.6	3.7	1.9	51.3514																						6.8	4.6	2.2
2017	3	C	I	4.6	3.7	1.8	48.6486																						6.7	4.6	2.1
2017	3	C	I	4.3	3.4	1.5	44.1176																						5.5	4.3	1.2
2017	3	C	I	4.2	3.3	1.4	42.4242																						5.4	4.2	1.2
2017	3	C	I	4.1	3.2	1.5	46.875																						5.3	4.1	1.2
2017	3	C	I	4	3.1	1.4	45.1613																						5.2	4	1.2
2017	3	C	I	4.9	3.7	1.7	45.9459																						6.2	4.9	1.3
2017	3	C	I	4.9	3.6	1.6	44.4444																						6.2	4.9	1.3
2017	3	C	I	5.1	3.7	1.7	45.9459																						6.4	5.1	1.3
2017	3	C	I	3.6	2.7	1.1	40.7407																						5.2	3.6	1.6
2017	3	C	I	6.1	4.7	2.1	44.6809																						8.3	6.1	2.2
2017	3	C	I	5.3	4	1.7	42.5																						7.7	5.3	2.4
2017	3	C	I	6.5	4.8	1.9	39.5833																						9.4	6.5	2.9
2017	3	C	I	3.4	2.7	1.3	48.1481																						4.9	3.4	1.5
2017	3	C	I	3.7	2.9	1.1	37.931																						4.9	3.7	1.2
2017	3	C	I	4.7	3.8	1.5	39.4737																						6.8	4.7	2.1
2017	3	C	I	5.6	4.3	1.8	41.8605																						8.3	5.6	2.7
2017	3	C	I	4.1	3.4	1.4	41.1765																						5.8	4.1	1.7
2017	3	C	II	6.8	4.8	2.4	50																						6.9	6.8	0.1
2017	3	C	II	6.7	4.8	2.4	50																						6.8	6.7	0.1
2017	3	C	II	4.7	3.5	1.5	42.8571																						5	4.7	0.3
2017	3	C	II	4.6	3.4	1.5	44.1176																						5	4.6	0.4
2017	3	C	II	6	4.2	2.1	50																						6.1	6	0.1
2017	3	C	II	6	4.1	2.1	51.2195																						6.1	6	0.1
2017	3	C	II	6.6	5.9	2.4	40.678																						6.8	6.6	0.2
2017	3	C	II	6.6	5.9	2.3	38.9831																						6.7	6.6	0.1
2017	3	C	II	7.2	4.6	2.1	45.6522																						7.3	7.2	0.1
2017	3	C	II	7.2	4.6	2	43.4783																						7.2	7.2	0
2017	3	C	II	6.4	4.1	1.5	36.5854																						6.5	6.4	0.1
2017	3	C	II	4.7	3.1	1.5	48.3871																						4.8	4.7	0.1
2017	3	C	II	6.2	4.1	1.8	43.9024																						6.2	6.2	0
2017	3	C	II	5.6	4.2	2	47.619																						5.7	5.6	0.1
2017	3	C	II	8.6	5.1	1.9	37.2549																						8.9	8.6	0.3
2017	3	C	II	5.9	4.4	2.2	50																						6.1	5.9	0.2
2017	3	C	II	8.5	5.6	2.6	46.4286																						8.6	8.5	0.1
2017	3	C	II	7.3	4.8	1.8	37.5																						7.3	7.3	0
2017	3	C	II	8.1	5.7	2.9	50.8772																						8.3	8.1	0.2
2017	3	C	II	5.8	4.4	2.2	50																						6.1	5.8	0.3
2017	3	C	II	5.8	4.4	2.2	50																						6.1	5.8	0.3
2017	3	C	II	5.8	4.4	2.2	50																						6.1	5.8	0.3
2017	3	C	II	5.9	4.1	1.7	41.4634																						6	5.9	0.1
2017	3	C	II	5.9	4.1	1.6	39.0244																						6	5.9	0.1
2017	3	C	II	7.1	5.8	2.5	43.1034																						7.3	7.1	0.2
2017	3	C	II	7.1	5.9	2.4	40.678																						7.2	7.1	0.1
2017	3	C	II	4.5	3.1	1.4	45.1613																						4.6	4.5	0.1
2017	3	C	II	4.4	3.1	1.4	45.1613																						4.5	4.4	0.1
2017	3	C	II	7.6	5	2.4	48																						7.7	7.6	0.1
2017	3	C	II	7.6	5	2.4	48																						7.7	7.6	0.1
2017	3	C	II	7.7	4.8	1.9	39.5833																						7.9	7.7	0.2
2017	3	C	II	7.8	4.5	1.8	40																						7.9	7.8	0.1
2017	3	C	II	9	5.1	1.9	37.2549																						9.1	9	0.1
2017	3	C	II	7.1	4.9	2.2	44.898																						7.3	7.1	0.2
2017	3	C	II	7.1	4.9	2.2	44.898																						7.3	7.1	0.2
2017	3	C	II	8.3	5	2.2	44																						8.4	8.3	0.1
2017	3	C	II	10.1	5.7	2.4	42.1053																						10.2	10.1	0.1
2017	3	C	II	6.2	4	2.4	60																						6.2	6.2	0
2017	3	C	II	7	4.5	2.3	51.1111																						7	7	0
2017	3	C	II	9.6	5.9	2.7	45.7627																						9.8	9.6	0.2
2017	3	C	III	7.3	5	2.6	52																						7.4	7.3	0.1
2017	3	C	III	7.3	4.9	2.5	51.0204																						7.4	7.3	0.1
2017	3	C	III	5.5	3.6	1.5	41.6667																						5.5	5.5	0
2017	3	C	III	5.4	3.5	1.5	42.8571																						5.4	5.4	0
2017	3	C	III	7.8	5.3	2.2	41.5094																						7.9	7.8	0.1
2017	3	C	III	7.8	5.3	2.1	39.6226																						7.8	7.8	0
2017	3	C	III	6.2	4.2	2	47.619																						6.3	6.2	0.1
2017	3	C	III	6.2	4.1	2	48.7805																						6.2	6.2	0
2017	3	C	III	7	4.8	2	41.6667																						6.9	7	-0.1
2017	3	C	III	6.9	4.8	2	41.6667																						6.9	6.9	0
2017	3	C	III	5.1	3.5	1.8	51.4286																						5.1	5.1	0
2017	3	C	III	5.1	3.7	2	54.0541																						5.1	5.1	0
2017	3	C	III	5.2	3.9	2.3	58.9744																						5.3	5.2	0.1
2017	3	C	III	6.1	4.3	2.2	51.1628																						6.2	6.1	0.1
2017	3	C	III	5.1	3.6	1.9	52.7778																						5	5.1	-0.1
2017	3	C	III	6.4	4.1	1.9	46.3415																						6.4	6.4	0
2017	3	C	III	6.8	4.7	2.6	55.3191																						6.9	6.8	0.1
2017	3	C	III	6.4	4.4	2.2	50																						6.5	6.4	0.1
2017	3	C	III	6.4	4.4	2.2	50																						6.4	6.4	0
2017	3	C	III	6.8	4.3	2	46.5116																						6.8	6.8	0
2017	3	C	III	6.4	4.3	1.9	44.186																						6.5	6.4	0.1
2017	3	C	III	6.3	4.4	1.8	40.9091																						6.4	6.3	0.1
2017	3	C	III	5.6	3.9	1.9	48.7179																						5.7	5.6	0.1
2017	3	C	III	5.5	3.9	1.9	48.7179																						5.6	5.5	0.1
2017	3	C	III	5.8	4.6	2.2	47.8261																						5.8	5.8	0
2017	3	C	III	5.8	4.5	2.2	48.8889																						5.8	5.8	0
2017	3	C	III	6.6	4.2	1.8	42.8571																						6.7	6.6	0.1
2017	3	C	III	6.5	4.2	1.8	42.8571																						6.6	6.5	0.1
2017	3	C	III	5.6	4.1	2.1	51.2195																						6.6	5.6	1
2017	3	C	III	5.6	4.1	2	48.7805																						6.6	5.6	1
2017	3	C	III	5.6	3.8	2.2	57.8947																						5.6	5.6	0
2017	3	C	III	6.6	4.3	2.2	51.1628																						6.9	6.6	0.3
2017	3	C	III	8.2	5.3	2.5	47.1698																						8.3	8.2	0.1
2017	3	C	III	7.4	4.7	1.9	40.4255																						7.5	7.4	0.1
2017	3	C	III	8.2	5.1	2.3	45.098																						8.2	8.2	0
2017	3	C	III	7.5	4.7	2.2	46.8085																						7.5	7.5	0
2017	3	C	III	3.7	2.5	1.2	48																						3.7	3.7	0
2017	3	C	III	6.4	4	1.6	40																						6.3	6.4	-0.1
2017	3	C	III	7	4.4	2	45.4545																						7.2	7	0.2
2017	3	C	III	7	4.4	2	45.4545																						7.2	7	0.2
2017	4	A	I	3.7	3.1	1.2	38.7097																						5.4	3.7	1.7
2017	4	A	I	3.8	3.2	1.4	43.75																						5.2	3.8	1.4
2017	4	A	I	3.2	2.7	0.8	29.6296																						4.2	3.2	1
2017	4	A	I	3.1	2.7	0.8	29.6296																						4.2	3.1	1.1
2017	4	A	I	3.3	2.9	1.3	44.8276																						4.8	3.3	1.5
2017	4	A	I	3.3	2.9	1.3	44.8276																						4.7	3.3	1.4
2017	4	A	I	3.5	3	1.1	36.6667																						4.7	3.5	1.2
2017	4	A	I	3.5	2.9	1	34.4828																						4.6	3.5	1.1
2017	4	A	I	3	2.7	0.9	33.3333																						4.4	3	1.4
2017	4	A	I	3	2.6	0.9	34.6154																						4.3	3	1.3
2017	4	A	I	3.7	3.1	1.2	38.7097																						5.4	3.7	1.7
2017	4	A	I	3.8	3.2	1.4	43.75																						5.2	3.8	1.4
2017	4	A	I	3.2	2.7	0.8	29.6296																						4.2	3.2	1
2017	4	A	I	3.1	2.7	0.8	29.6296																						4.2	3.1	1.1
2017	4	A	I	3.3	2.9	1.3	44.8276																						4.8	3.3	1.5
2017	4	A	I	3.3	2.9	1.3	44.8276																						4.7	3.3	1.4
2017	4	A	I	3.5	3	1.1	36.6667																						4.7	3.5	1.2
2017	4	A	I	3.5	2.9	1	34.4828																						4.6	3.5	1.1
2017	4	A	I	3	2.7	0.9	33.3333																						4.4	3	1.4
2017	4	A	I	3	2.6	0.9	34.6154																						4.3	3	1.3
2017	4	A	I	3.7	3.1	1.2	38.7097																						5.4	3.7	1.7
2017	4	A	I	3.8	3.2	1.4	43.75																						5.2	3.8	1.4
2017	4	A	I	3.2	2.7	0.8	29.6296																						4.2	3.2	1
2017	4	A	I	3.1	2.7	0.8	29.6296																						4.2	3.1	1.1
2017	4	A	I	3.3	2.9	1.3	44.8276																						4.8	3.3	1.5
2017	4	A	I	3.3	2.9	1.3	44.8276																						4.7	3.3	1.4
2017	4	A	I	3.5	3	1.1	36.6667																						4.7	3.5	1.2
2017	4	A	I	3.5	2.9	1	34.4828																						4.6	3.5	1.1
2017	4	A	I	3	2.7	0.9	33.3333																						4.4	3	1.4
2017	4	A	I	3	2.6	0.9	34.6154																						4.3	3	1.3
2017	4	A	I	3.7	3.1	1.2	38.7097																						5.4	3.7	1.7
2017	4	A	I	3.8	3.2	1.4	43.75																						5.2	3.8	1.4
2017	4	A	I	3.2	2.7	0.8	29.6296																						4.2	3.2	1
2017	4	A	I	3.1	2.7	0.8	29.6296																						4.2	3.1	1.1
2017	4	A	I	3.3	2.9	1.3	44.8276																						4.8	3.3	1.5
2017	4	A	I	3.3	2.9	1.3	44.8276																						4.7	3.3	1.4
2017	4	A	I	3.5	3	1.1	36.6667																						4.7	3.5	1.2
2017	4	A	I	3.5	2.9	1	34.4828																						4.6	3.5	1.1
2017	4	A	I	3	2.7	0.9	33.3333																						4.4	3	1.4
2017	4	A	I	3	2.6	0.9	34.6154																						4.3	3	1.3
2017	4	A	II	3.4	2.9	0.9	31.0345																						6.1	3.4	2.7
2017	4	A	II	4.3	3.7	1.5	40.5405																						7.9	4.3	3.6
2017	4	A	II	3.6	3	1.1	36.6667																						6.7	3.6	3.1
2017	4	A	II	5.3	4.6	2	43.4783																						8.7	5.3	3.4
2017	4	A	II	3.4	3	1.2	40																						5.9	3.4	2.5
2017	4	A	II	4.7	3.9	1.4	35.8974																						8.3	4.7	3.6
2017	4	A	II	4.7	3.8	1.3	34.2105																						8.2	4.7	3.5
2017	4	A	II	4.4	3.9	1.5	38.4615																						7.6	4.4	3.2
2017	4	A	II	4.4	3.8	1.5	39.4737																						7.5	4.4	3.1
2017	4	A	II	4.5	3.7	1.5	40.5405																						7.7	4.5	3.2
2017	4	A	II	3.4	2.9	0.9	31.0345																						6.1	3.4	2.7
2017	4	A	II	4.3	3.7	1.5	40.5405																						7.9	4.3	3.6
2017	4	A	II	3.6	3	1.1	36.6667																						6.7	3.6	3.1
2017	4	A	II	5.3	4.6	2	43.4783																						8.7	5.3	3.4
2017	4	A	II	3.4	3	1.2	40																						5.9	3.4	2.5
2017	4	A	II	4.7	3.9	1.4	35.8974																						8.3	4.7	3.6
2017	4	A	II	4.7	3.8	1.3	34.2105																						8.2	4.7	3.5
2017	4	A	II	4.4	3.9	1.5	38.4615																						7.6	4.4	3.2
2017	4	A	II	4.4	3.8	1.5	39.4737																						7.5	4.4	3.1
2017	4	A	II	4.5	3.7	1.5	40.5405																						7.7	4.5	3.2
2017	4	A	II	3.4	2.9	0.9	31.0345																						6.1	3.4	2.7
2017	4	A	II	4.3	3.7	1.5	40.5405																						7.9	4.3	3.6
2017	4	A	II	3.6	3	1.1	36.6667																						6.7	3.6	3.1
2017	4	A	II	5.3	4.6	2	43.4783																						8.7	5.3	3.4
2017	4	A	II	3.4	3	1.2	40																						5.9	3.4	2.5
2017	4	A	II	4.7	3.9	1.4	35.8974																						8.3	4.7	3.6
2017	4	A	II	4.7	3.8	1.3	34.2105																						8.2	4.7	3.5
2017	4	A	II	4.4	3.9	1.5	38.4615																						7.6	4.4	3.2
2017	4	A	II	4.4	3.8	1.5	39.4737																						7.5	4.4	3.1
2017	4	A	II	4.5	3.7	1.5	40.5405																						7.7	4.5	3.2
2017	4	A	II	3.4	2.9	0.9	31.0345																						6.1	3.4	2.7
2017	4	A	II	4.3	3.7	1.5	40.5405																						7.9	4.3	3.6
2017	4	A	II	3.6	3	1.1	36.6667																						6.7	3.6	3.1
2017	4	A	II	5.3	4.6	2	43.4783																						8.7	5.3	3.4
2017	4	A	II	3.4	3	1.2	40																						5.9	3.4	2.5
2017	4	A	II	4.7	3.9	1.4	35.8974																						8.3	4.7	3.6
2017	4	A	II	4.7	3.8	1.3	34.2105																						8.2	4.7	3.5
2017	4	A	II	4.4	3.9	1.5	38.4615																						7.6	4.4	3.2
2017	4	A	II	4.4	3.8	1.5	39.4737																						7.5	4.4	3.1
2017	4	A	II	4.5	3.7	1.5	40.5405																						7.7	4.5	3.2
2017	4	A	III	4.2	3.7	1.8	48.6486																						7	4.2	2.8
2017	4	A	III	4.2	3.6	1.7	47.2222																						7	4.2	2.8
2017	4	A	III	3.8	3.3	1.6	48.4848																						6	3.8	2.2
2017	4	A	III	3.7	3.3	1.5	45.4545																						6	3.7	2.3
2017	4	A	III	3.6	2.9	1.2	41.3793																						7.3	3.6	3.7
2017	4	A	III	4.1	3.5	1.3	37.1429																						7.2	4.1	3.1
2017	4	A	III	4	3.5	1.4	40																						7	4	3
2017	4	A	III	3	2.6	0.9	34.6154																						5.7	3	2.7
2017	4	A	III	4.2	3.7	1.6	43.2432																						7.1	4.2	2.9
2017	4	A	III	3.1	2.7	1	37.037																						6.2	3.1	3.1
2017	4	A	III	4.2	3.7	1.8	48.6486																						7	4.2	2.8
2017	4	A	III	4.2	3.6	1.7	47.2222																						7	4.2	2.8
2017	4	A	III	3.8	3.3	1.6	48.4848																						6	3.8	2.2
2017	4	A	III	3.7	3.3	1.5	45.4545																						6	3.7	2.3
2017	4	A	III	3.6	2.9	1.2	41.3793																						7.3	3.6	3.7
2017	4	A	III	4.1	3.5	1.3	37.1429																						7.2	4.1	3.1
2017	4	A	III	4	3.5	1.4	40																						7	4	3
2017	4	A	III	3	2.6	0.9	34.6154																						5.7	3	2.7
2017	4	A	III	4.2	3.7	1.6	43.2432																						7.1	4.2	2.9
2017	4	A	III	3.1	2.7	1	37.037																						6.2	3.1	3.1
2017	4	A	III	4.2	3.7	1.8	48.6486																						7	4.2	2.8
2017	4	A	III	4.2	3.6	1.7	47.2222																						7	4.2	2.8
2017	4	A	III	3.8	3.3	1.6	48.4848																						6	3.8	2.2
2017	4	A	III	3.7	3.3	1.5	45.4545																						6	3.7	2.3
2017	4	A	III	3.6	2.9	1.2	41.3793																						7.3	3.6	3.7
2017	4	A	III	4.1	3.5	1.3	37.1429																						7.2	4.1	3.1
2017	4	A	III	4	3.5	1.4	40																						7	4	3
2017	4	A	III	3	2.6	0.9	34.6154																						5.7	3	2.7
2017	4	A	III	4.2	3.7	1.6	43.2432																						7.1	4.2	2.9
2017	4	A	III	3.1	2.7	1	37.037																						6.2	3.1	3.1
2017	4	A	III	4.2	3.7	1.8	48.6486																						7	4.2	2.8
2017	4	A	III	4.2	3.6	1.7	47.2222																						7	4.2	2.8
2017	4	A	III	3.8	3.3	1.6	48.4848																						6	3.8	2.2
2017	4	A	III	3.7	3.3	1.5	45.4545																						6	3.7	2.3
2017	4	A	III	3.6	2.9	1.2	41.3793																						7.3	3.6	3.7
2017	4	A	III	4.1	3.5	1.3	37.1429																						7.2	4.1	3.1
2017	4	A	III	4	3.5	1.4	40																						7	4	3
2017	4	A	III	3	2.6	0.9	34.6154																						5.7	3	2.7
2017	4	A	III	4.2	3.7	1.6	43.2432																						7.1	4.2	2.9
2017	4	A	III	3.1	2.7	1	37.037																						6.2	3.1	3.1
2017	4	B	I	3.3	2.8	1.4	50																						4.8	3.3	1.5
2017	4	B	I	3.6	3.2	0.9	28.125																						5.5	3.6	1.9
2017	4	B	I	4.4	3.9	1.4	35.8974																						6.5	4.4	2.1
2017	4	B	I	4.1	3.4	1.4	41.1765																						6.3	4.1	2.2
2017	4	B	I	4.3	3.7	1.5	40.5405																						6	4.3	1.7
2017	4	B	I	4.3	3.6	1.5	41.6667																						6	4.3	1.7
2017	4	B	I	3.8	3.1	1.1	35.4839																						5.6	3.8	1.8
2017	4	B	I	3.7	3.1	1.1	35.4839																						5.6	3.7	1.9
2017	4	B	I	4.5	3.8	1.6	42.1053																						6.9	4.5	2.4
2017	4	B	I	4.5	3.8	1.6	42.1053																						6.9	4.5	2.4
2017	4	B	I	3.3	2.8	1.4	50																						4.8	3.3	1.5
2017	4	B	I	3.6	3.2	0.9	28.125																						5.5	3.6	1.9
2017	4	B	I	4.4	3.9	1.4	35.8974																						6.5	4.4	2.1
2017	4	B	I	4.1	3.4	1.4	41.1765																						6.3	4.1	2.2
2017	4	B	I	4.3	3.7	1.5	40.5405																						6	4.3	1.7
2017	4	B	I	4.3	3.6	1.5	41.6667																						6	4.3	1.7
2017	4	B	I	3.8	3.1	1.1	35.4839																						5.6	3.8	1.8
2017	4	B	I	3.7	3.1	1.1	35.4839																						5.6	3.7	1.9
2017	4	B	I	4.5	3.8	1.6	42.1053																						6.9	4.5	2.4
2017	4	B	I	4.5	3.8	1.6	42.1053																						6.9	4.5	2.4
2017	4	B	I	3.3	2.8	1.4	50																						4.8	3.3	1.5
2017	4	B	I	3.6	3.2	0.9	28.125																						5.5	3.6	1.9
2017	4	B	I	4.4	3.9	1.4	35.8974																						6.5	4.4	2.1
2017	4	B	I	4.1	3.4	1.4	41.1765																						6.3	4.1	2.2
2017	4	B	I	4.3	3.7	1.5	40.5405																						6	4.3	1.7
2017	4	B	I	4.3	3.6	1.5	41.6667																						6	4.3	1.7
2017	4	B	I	3.8	3.1	1.1	35.4839																						5.6	3.8	1.8
2017	4	B	I	3.7	3.1	1.1	35.4839																						5.6	3.7	1.9
2017	4	B	I	4.5	3.8	1.6	42.1053																						6.9	4.5	2.4
2017	4	B	I	4.5	3.8	1.6	42.1053																						6.9	4.5	2.4
2017	4	B	I	3.3	2.8	1.4	50																						4.8	3.3	1.5
2017	4	B	I	3.6	3.2	0.9	28.125																						5.5	3.6	1.9
2017	4	B	I	4.4	3.9	1.4	35.8974																						6.5	4.4	2.1
2017	4	B	I	4.1	3.4	1.4	41.1765																						6.3	4.1	2.2
2017	4	B	I	4.3	3.7	1.5	40.5405																						6	4.3	1.7
2017	4	B	I	4.3	3.6	1.5	41.6667																						6	4.3	1.7
2017	4	B	I	3.8	3.1	1.1	35.4839																						5.6	3.8	1.8
2017	4	B	I	3.7	3.1	1.1	35.4839																						5.6	3.7	1.9
2017	4	B	I	4.5	3.8	1.6	42.1053																						6.9	4.5	2.4
2017	4	B	I	4.5	3.8	1.6	42.1053																						6.9	4.5	2.4
2017	4	B	II	4.1	3.6	1.7	47.2222																						6.6	4.1	2.5
2017	4	B	II	4	3.6	1.6	44.4444																						6.6	4	2.6
2017	4	B	II	4.1	3.5	1.5	42.8571																						6.6	4.1	2.5
2017	4	B	II	4	3.5	1.5	42.8571																						6.6	4	2.6
2017	4	B	II	5.9	4.9	2.1	42.8571																						9.5	5.9	3.6
2017	4	B	II	3.7	3.1	0.9	29.0323																						7	3.7	3.3
2017	4	B	II	3.6	3.1	1.2	38.7097																						6.3	3.6	2.7
2017	4	B	II	5.4	4.5	1.6	35.5556																						9.7	5.4	4.3
2017	4	B	II	3.9	3.3	1.4	42.4242																						7	3.9	3.1
2017	4	B	II	4.1	3.4	1.1	32.3529																						7.4	4.1	3.3
2017	4	B	II	4.1	3.6	1.7	47.2222																						6.6	4.1	2.5
2017	4	B	II	4	3.6	1.6	44.4444																						6.6	4	2.6
2017	4	B	II	4.1	3.5	1.5	42.8571																						6.6	4.1	2.5
2017	4	B	II	4	3.5	1.5	42.8571																						6.6	4	2.6
2017	4	B	II	5.9	4.9	2.1	42.8571																						9.5	5.9	3.6
2017	4	B	II	3.7	3.1	0.9	29.0323																						7	3.7	3.3
2017	4	B	II	3.6	3.1	1.2	38.7097																						6.3	3.6	2.7
2017	4	B	II	5.4	4.5	1.6	35.5556																						9.7	5.4	4.3
2017	4	B	II	3.9	3.3	1.4	42.4242																						7	3.9	3.1
2017	4	B	II	4.1	3.4	1.1	32.3529																						7.4	4.1	3.3
2017	4	B	II	4.1	3.6	1.7	47.2222																						6.6	4.1	2.5
2017	4	B	II	4	3.6	1.6	44.4444																						6.6	4	2.6
2017	4	B	II	4.1	3.5	1.5	42.8571																						6.6	4.1	2.5
2017	4	B	II	4	3.5	1.5	42.8571																						6.6	4	2.6
2017	4	B	II	5.9	4.9	2.1	42.8571																						9.5	5.9	3.6
2017	4	B	II	3.7	3.1	0.9	29.0323																						7	3.7	3.3
2017	4	B	II	3.6	3.1	1.2	38.7097																						6.3	3.6	2.7
2017	4	B	II	5.4	4.5	1.6	35.5556																						9.7	5.4	4.3
2017	4	B	II	3.9	3.3	1.4	42.4242																						7	3.9	3.1
2017	4	B	II	4.1	3.4	1.1	32.3529																						7.4	4.1	3.3
2017	4	B	II	4.1	3.6	1.7	47.2222																						6.6	4.1	2.5
2017	4	B	II	4	3.6	1.6	44.4444																						6.6	4	2.6
2017	4	B	II	4.1	3.5	1.5	42.8571																						6.6	4.1	2.5
2017	4	B	II	4	3.5	1.5	42.8571																						6.6	4	2.6
2017	4	B	II	5.9	4.9	2.1	42.8571																						9.5	5.9	3.6
2017	4	B	II	3.7	3.1	0.9	29.0323																						7	3.7	3.3
2017	4	B	II	3.6	3.1	1.2	38.7097																						6.3	3.6	2.7
2017	4	B	II	5.4	4.5	1.6	35.5556																						9.7	5.4	4.3
2017	4	B	II	3.9	3.3	1.4	42.4242																						7	3.9	3.1
2017	4	B	II	4.1	3.4	1.1	32.3529																						7.4	4.1	3.3
2017	4	B	III	3.7	3.1	1.1	35.4839																						7.4	3.7	3.7
2017	4	B	III	4.2	3.5	1.3	37.1429																						7.9	4.2	3.7
2017	4	B	III	3.7	3.2	1.2	37.5																						7	3.7	3.3
2017	4	B	III	3.9	3.4	1.3	38.2353																						7.4	3.9	3.5
2017	4	B	III	3.8	3.3	1.4	42.4242																						7	3.8	3.2
2017	4	B	III	3.7	3.2	1.3	40.625																						6.9	3.7	3.2
2017	4	B	III	3.6	3.1	1	32.2581																						6.9	3.6	3.3
2017	4	B	III	3.6	3	1	33.3333																						6.8	3.6	3.2
2017	4	B	III	3.9	3.4	1.5	44.1176																						6.9	3.9	3
2017	4	B	III	3.8	3.3	1.4	42.4242																						6.8	3.8	3
2017	4	B	III	3.7	3.1	1.1	35.4839																						7.4	3.7	3.7
2017	4	B	III	4.2	3.5	1.3	37.1429																						7.9	4.2	3.7
2017	4	B	III	3.7	3.2	1.2	37.5																						7	3.7	3.3
2017	4	B	III	3.9	3.4	1.3	38.2353																						7.4	3.9	3.5
2017	4	B	III	3.8	3.3	1.4	42.4242																						7	3.8	3.2
2017	4	B	III	3.7	3.2	1.3	40.625																						6.9	3.7	3.2
2017	4	B	III	3.6	3.1	1	32.2581																						6.9	3.6	3.3
2017	4	B	III	3.6	3	1	33.3333																						6.8	3.6	3.2
2017	4	B	III	3.9	3.4	1.5	44.1176																						6.9	3.9	3
2017	4	B	III	3.8	3.3	1.4	42.4242																						6.8	3.8	3
2017	4	B	III	3.7	3.1	1.1	35.4839																						7.4	3.7	3.7
2017	4	B	III	4.2	3.5	1.3	37.1429																						7.9	4.2	3.7
2017	4	B	III	3.7	3.2	1.2	37.5																						7	3.7	3.3
2017	4	B	III	3.9	3.4	1.3	38.2353																						7.4	3.9	3.5
2017	4	B	III	3.8	3.3	1.4	42.4242																						7	3.8	3.2
2017	4	B	III	3.7	3.2	1.3	40.625																						6.9	3.7	3.2
2017	4	B	III	3.6	3.1	1	32.2581																						6.9	3.6	3.3
2017	4	B	III	3.6	3	1	33.3333																						6.8	3.6	3.2
2017	4	B	III	3.9	3.4	1.5	44.1176																						6.9	3.9	3
2017	4	B	III	3.8	3.3	1.4	42.4242																						6.8	3.8	3
2017	4	B	III	3.7	3.1	1.1	35.4839																						7.4	3.7	3.7
2017	4	B	III	4.2	3.5	1.3	37.1429																						7.9	4.2	3.7
2017	4	B	III	3.7	3.2	1.2	37.5																						7	3.7	3.3
2017	4	B	III	3.9	3.4	1.3	38.2353																						7.4	3.9	3.5
2017	4	B	III	3.8	3.3	1.4	42.4242																						7	3.8	3.2
2017	4	B	III	3.7	3.2	1.3	40.625																						6.9	3.7	3.2
2017	4	B	III	3.6	3.1	1	32.2581																						6.9	3.6	3.3
2017	4	B	III	3.6	3	1	33.3333																						6.8	3.6	3.2
2017	4	B	III	3.9	3.4	1.5	44.1176																						6.9	3.9	3
2017	4	B	III	3.8	3.3	1.4	42.4242																						6.8	3.8	3
2017	4	C	I	2.9	2.4	0.9	37.5																						3.9	2.9	1
2017	4	C	I	5	4.3	1.8	41.8605																						6.1	5	1.1
2017	4	C	I	4.5	3.6	1.2	33.3333																						6.1	4.5	1.6
2017	4	C	I	4.8	3.9	1.4	35.8974																						6.9	4.8	2.1
2017	4	C	I	3.1	2.6	1.2	46.1538																						4.1	3.1	1
2017	4	C	I	3	2.6	1.1	42.3077																						4.1	3	1.1
2017	4	C	I	3.4	3	1.3	43.3333																						5.4	3.4	2
2017	4	C	I	3.4	2.9	1.3	44.8276																						5.3	3.4	1.9
2017	4	C	I	3.5	2.9	1.2	41.3793																						4.6	3.5	1.1
2017	4	C	I	3.4	2.8	1.1	39.2857																						4.6	3.4	1.2
2017	4	C	I	2.9	2.4	0.9	37.5																						3.9	2.9	1
2017	4	C	I	5	4.3	1.8	41.8605																						6.1	5	1.1
2017	4	C	I	4.5	3.6	1.2	33.3333																						6.1	4.5	1.6
2017	4	C	I	4.8	3.9	1.4	35.8974																						6.9	4.8	2.1
2017	4	C	I	3.1	2.6	1.2	46.1538																						4.1	3.1	1
2017	4	C	I	3	2.6	1.1	42.3077																						4.1	3	1.1
2017	4	C	I	3.4	3	1.3	43.3333																						5.4	3.4	2
2017	4	C	I	3.4	2.9	1.3	44.8276																						5.3	3.4	1.9
2017	4	C	I	3.5	2.9	1.2	41.3793																						4.6	3.5	1.1
2017	4	C	I	3.4	2.8	1.1	39.2857																						4.6	3.4	1.2
2017	4	C	I	2.9	2.4	0.9	37.5																						3.9	2.9	1
2017	4	C	I	5	4.3	1.8	41.8605																						6.1	5	1.1
2017	4	C	I	4.5	3.6	1.2	33.3333																						6.1	4.5	1.6
2017	4	C	I	4.8	3.9	1.4	35.8974																						6.9	4.8	2.1
2017	4	C	I	3.1	2.6	1.2	46.1538																						4.1	3.1	1
2017	4	C	I	3	2.6	1.1	42.3077																						4.1	3	1.1
2017	4	C	I	3.4	3	1.3	43.3333																						5.4	3.4	2
2017	4	C	I	3.4	2.9	1.3	44.8276																						5.3	3.4	1.9
2017	4	C	I	3.5	2.9	1.2	41.3793																						4.6	3.5	1.1
2017	4	C	I	3.4	2.8	1.1	39.2857																						4.6	3.4	1.2
2017	4	C	I	2.9	2.4	0.9	37.5																						3.9	2.9	1
2017	4	C	I	5	4.3	1.8	41.8605																						6.1	5	1.1
2017	4	C	I	4.5	3.6	1.2	33.3333																						6.1	4.5	1.6
2017	4	C	I	4.8	3.9	1.4	35.8974																						6.9	4.8	2.1
2017	4	C	I	3.1	2.6	1.2	46.1538																						4.1	3.1	1
2017	4	C	I	3	2.6	1.1	42.3077																						4.1	3	1.1
2017	4	C	I	3.4	3	1.3	43.3333																						5.4	3.4	2
2017	4	C	I	3.4	2.9	1.3	44.8276																						5.3	3.4	1.9
2017	4	C	I	3.5	2.9	1.2	41.3793																						4.6	3.5	1.1
2017	4	C	I	3.4	2.8	1.1	39.2857																						4.6	3.4	1.2
2017	4	C	II	5.3	4.5	1.8	40																						8.7	5.3	3.4
2017	4	C	II	5.2	4.4	1.7	38.6364																						8.6	5.2	3.4
2017	4	C	II	3.6	3.2	1.5	46.875																						6	3.6	2.4
2017	4	C	II	3.6	3.1	1.4	45.1613																						5.9	3.6	2.3
2017	4	C	II	3.6	3.1	1.5	48.3871																						6.3	3.6	2.7
2017	4	C	II	3.6	3.1	1.4	45.1613																						6.2	3.6	2.6
2017	4	C	II	4.2	3.4	1.4	41.1765																						7.5	4.2	3.3
2017	4	C	II	3.9	3.5	1.6	45.7143																						6.8	3.9	2.9
2017	4	C	II	3.6	3.1	1.4	45.1613																						6.3	3.6	2.7
2017	4	C	II	4.6	3.9	1.6	41.0256																						8.2	4.6	3.6
2017	4	C	II	5.3	4.5	1.8	40																						8.7	5.3	3.4
2017	4	C	II	5.2	4.4	1.7	38.6364																						8.6	5.2	3.4
2017	4	C	II	3.6	3.2	1.5	46.875																						6	3.6	2.4
2017	4	C	II	3.6	3.1	1.4	45.1613																						5.9	3.6	2.3
2017	4	C	II	3.6	3.1	1.5	48.3871																						6.3	3.6	2.7
2017	4	C	II	3.6	3.1	1.4	45.1613																						6.2	3.6	2.6
2017	4	C	II	4.2	3.4	1.4	41.1765																						7.5	4.2	3.3
2017	4	C	II	3.9	3.5	1.6	45.7143																						6.8	3.9	2.9
2017	4	C	II	3.6	3.1	1.4	45.1613																						6.3	3.6	2.7
2017	4	C	II	4.6	3.9	1.6	41.0256																						8.2	4.6	3.6
2017	4	C	II	5.3	4.5	1.8	40																						8.7	5.3	3.4
2017	4	C	II	5.2	4.4	1.7	38.6364																						8.6	5.2	3.4
2017	4	C	II	3.6	3.2	1.5	46.875																						6	3.6	2.4
2017	4	C	II	3.6	3.1	1.4	45.1613																						5.9	3.6	2.3
2017	4	C	II	3.6	3.1	1.5	48.3871																						6.3	3.6	2.7
2017	4	C	II	3.6	3.1	1.4	45.1613																						6.2	3.6	2.6
2017	4	C	II	4.2	3.4	1.4	41.1765																						7.5	4.2	3.3
2017	4	C	II	3.9	3.5	1.6	45.7143																						6.8	3.9	2.9
2017	4	C	II	3.6	3.1	1.4	45.1613																						6.3	3.6	2.7
2017	4	C	II	4.6	3.9	1.6	41.0256																						8.2	4.6	3.6
2017	4	C	II	5.3	4.5	1.8	40																						8.7	5.3	3.4
2017	4	C	II	5.2	4.4	1.7	38.6364																						8.6	5.2	3.4
2017	4	C	II	3.6	3.2	1.5	46.875																						6	3.6	2.4
2017	4	C	II	3.6	3.1	1.4	45.1613																						5.9	3.6	2.3
2017	4	C	II	3.6	3.1	1.5	48.3871																						6.3	3.6	2.7
2017	4	C	II	3.6	3.1	1.4	45.1613																						6.2	3.6	2.6
2017	4	C	II	4.2	3.4	1.4	41.1765																						7.5	4.2	3.3
2017	4	C	II	3.9	3.5	1.6	45.7143																						6.8	3.9	2.9
2017	4	C	II	3.6	3.1	1.4	45.1613																						6.3	3.6	2.7
2017	4	C	II	4.6	3.9	1.6	41.0256																						8.2	4.6	3.6
2017	4	C	III	4.3	3.6	1.3	36.1111																						7.8	4.3	3.5
2017	4	C	III	3.3	2.9	1.3	44.8276																						5.8	3.3	2.5
2017	4	C	III	2.9	2.6	1.1	42.3077																						4.8	2.9	1.9
2017	4	C	III	4.2	3.6	1.3	36.1111																						7.5	4.2	3.3
2017	4	C	III	3.2	2.7	1.1	40.7407																						5.6	3.2	2.4
2017	4	C	III	3.1	2.7	1	37.037																						5.5	3.1	2.4
2017	4	C	III	4.1	3.5	1.2	34.2857																						7.4	4.1	3.3
2017	4	C	III	4	3.5	1.2	34.2857																						7.3	4	3.3
2017	4	C	III	3.4	2.9	1	34.4828																						6.1	3.4	2.7
2017	4	C	III	3.3	2.8	1	35.7143																						6.1	3.3	2.8
2017	4	C	III	4.3	3.6	1.3	36.1111																						7.8	4.3	3.5
2017	4	C	III	3.3	2.9	1.3	44.8276																						5.8	3.3	2.5
2017	4	C	III	2.9	2.6	1.1	42.3077																						4.8	2.9	1.9
2017	4	C	III	4.2	3.6	1.3	36.1111																						7.5	4.2	3.3
2017	4	C	III	3.2	2.7	1.1	40.7407																						5.6	3.2	2.4
2017	4	C	III	3.1	2.7	1	37.037																						5.5	3.1	2.4
2017	4	C	III	4.1	3.5	1.2	34.2857																						7.4	4.1	3.3
2017	4	C	III	4	3.5	1.2	34.2857																						7.3	4	3.3
2017	4	C	III	3.4	2.9	1	34.4828																						6.1	3.4	2.7
2017	4	C	III	3.3	2.8	1	35.7143																						6.1	3.3	2.8
2017	4	C	III	4.3	3.6	1.3	36.1111																						7.8	4.3	3.5
2017	4	C	III	3.3	2.9	1.3	44.8276																						5.8	3.3	2.5
2017	4	C	III	2.9	2.6	1.1	42.3077																						4.8	2.9	1.9
2017	4	C	III	4.2	3.6	1.3	36.1111																						7.5	4.2	3.3
2017	4	C	III	3.2	2.7	1.1	40.7407																						5.6	3.2	2.4
2017	4	C	III	3.1	2.7	1	37.037																						5.5	3.1	2.4
2017	4	C	III	4.1	3.5	1.2	34.2857																						7.4	4.1	3.3
2017	4	C	III	4	3.5	1.2	34.2857																						7.3	4	3.3
2017	4	C	III	3.4	2.9	1	34.4828																						6.1	3.4	2.7
2017	4	C	III	3.3	2.8	1	35.7143																						6.1	3.3	2.8
2017	4	C	III	4.3	3.6	1.3	36.1111																						7.8	4.3	3.5
2017	4	C	III	3.3	2.9	1.3	44.8276																						5.8	3.3	2.5
2017	4	C	III	2.9	2.6	1.1	42.3077																						4.8	2.9	1.9
2017	4	C	III	4.2	3.6	1.3	36.1111																						7.5	4.2	3.3
2017	4	C	III	3.2	2.7	1.1	40.7407																						5.6	3.2	2.4
2017	4	C	III	3.1	2.7	1	37.037																						5.5	3.1	2.4
2017	4	C	III	4.1	3.5	1.2	34.2857																						7.4	4.1	3.3
2017	4	C	III	4	3.5	1.2	34.2857																						7.3	4	3.3
2017	4	C	III	3.4	2.9	1	34.4828																						6.1	3.4	2.7
2017	4	C	III	3.3	2.8	1	35.7143																						6.1	3.3	2.8
2017	5	A	I	3.5	2.8	1.2	42.8571																						5.3	3.5	1.8
2017	5	A	I	3.5	2.8	1.2	42.8571																						5.3	3.5	1.8
2017	5	A	I	3.5	2.8	1.2	42.8571																						5.3	3.5	1.8
2017	5	A	I	3.5	2.8	1.2	42.8571																						5.3	3.5	1.8
2017	5	A	I	4.5	3.6	1.5	41.6667																						6.2	4.5	1.7
2017	5	A	I	4.4	3.6	1.4	38.8889																						6.2	4.4	1.8
2017	5	A	I	4.5	3.6	1.5	41.6667																						6.5	4.5	2
2017	5	A	I	4.5	3.6	1.5	41.6667																						6.5	4.5	2
2017	5	A	I	4.7	3.9	2	51.2821																						6.6	4.7	1.9
2017	5	A	I	4.6	3.9	1.9	48.7179																						6.5	4.6	1.9
2017	5	A	I	4.1	3.3	1.4	42.4242																						6.3	4.1	2.2
2017	5	A	I	4.1	3.3	1.1	33.3333																						6.4	4.1	2.3
2017	5	A	I	3.7	3	1	33.3333																						6.1	3.7	2.4
2017	5	A	I	3.6	2.9	1.1	37.931																						5.4	3.6	1.8
2017	5	A	I	4.3	2.9	1.2	41.3793																						5.3	4.3	1
2017	5	A	I	3.8	3.2	1	31.25																						6	3.8	2.2
2017	5	A	I	5.7	4.6	2	43.4783																						8.5	5.7	2.8
2017	5	A	I	3.5	2.9	1	34.4828																						5.3	3.5	1.8
2017	5	A	I	4.1	3.5	1.5	42.8571																						6.4	4.1	2.3
2017	5	A	I	5.2	4.1	1.6	39.0244																						7.9	5.2	2.7
2017	5	A	I	3.4	2.8	1.3	46.4286																						4.6	3.4	1.2
2017	5	A	I	3.3	2.7	1.3	48.1481																						4.6	3.3	1.3
2017	5	A	I	5.1	4	1.7	42.5																						7.9	5.1	2.8
2017	5	A	I	5.1	4	1.6	40																						7.8	5.1	2.7
2017	5	A	I	3.5	2.8	1.2	42.8571																						5.1	3.5	1.6
2017	5	A	I	3.4	2.7	1.2	44.4444																						5	3.4	1.6
2017	5	A	I	4.3	3.6	1.6	44.4444																						6.5	4.3	2.2
2017	5	A	I	4.3	3.5	1.5	42.8571																						6.4	4.3	2.1
2017	5	A	I	3.7	3.2	1.4	43.75																						6.7	3.7	3
2017	5	A	I	3.7	3.2	1.4	43.75																						6.6	3.7	2.9
2017	5	A	I	4.2	3.4	1.3	38.2353																						7.2	4.2	3
2017	5	A	I	2.6	2.2	0.9	40.9091																						3.8	2.6	1.2
2017	5	A	I	4.3	3.4	1.1	32.3529																						6.7	4.3	2.4
2017	5	A	I	4.3	3.4	1.5	44.1176																						6.3	4.3	2
2017	5	A	I	4.4	3.6	1.6	44.4444																						6.7	4.4	2.3
2017	5	A	I	4.3	3.5	1.4	40																						7.7	4.3	3.4
2017	5	A	I	2.7	2.2	0.8	36.3636																						4.7	2.7	2
2017	5	A	I	4.7	4	1.6	40																						7.3	4.7	2.6
2017	5	A	I	4.4	3.4	1.4	41.1765																						7	4.4	2.6
2017	5	A	I	3.5	2.8	1	35.7143																						5.6	3.5	2.1
2017	5	A	II	7.1	4.6	2.2	47.8261																						7.4	7.1	0.3
2017	5	A	II	7.1	4.5	2.2	48.8889																						7.4	7.1	0.3
2017	5	A	II	7.3	4.9	2.4	48.9796																						7.7	7.3	0.4
2017	5	A	II	7.3	4.9	2.4	48.9796																						7.6	7.3	0.3
2017	5	A	II	6.7	4.5	2.3	51.1111																						7	6.7	0.3
2017	5	A	II	6.7	4.5	2.2	48.8889																						6.9	6.7	0.2
2017	5	A	II	7.1	4.6	2.1	45.6522																						7.4	7.1	0.3
2017	5	A	II	7	4.5	2	44.4444																						7.4	7	0.4
2017	5	A	II	7.7	4.9	2.4	48.9796																						8.1	7.7	0.4
2017	5	A	II	8.6	5.1	2.4	47.0588																						8.9	8.6	0.3
2017	5	A	II	6.7	4.6	2.1	45.6522																						6.8	6.7	0.1
2017	5	A	II	7.2	4.7	2.1	44.6809																						7.8	7.2	0.6
2017	5	A	II	6.2	4.2	2.1	50																						6.3	6.2	0.1
2017	5	A	II	7	5.1	2.6	50.9804																						7.3	7	0.3
2017	5	A	II	7.2	4.8	2.4	50																						7.4	7.2	0.2
2017	5	A	II	7.1	4.8	2.4	50																						7.2	7.1	0.1
2017	5	A	II	7	4.5	2	44.4444																						7.3	7	0.3
2017	5	A	II	7.6	5.1	2.6	50.9804																						7.7	7.6	0.1
2017	5	A	II	8.6	5.5	2.4	43.6364																						9.2	8.6	0.6
2017	5	A	II	8.1	5.3	2.7	50.9434																						8.4	8.1	0.3
2017	5	A	II	6.9	4.4	2.2	50																						7.1	6.9	0.2
2017	5	A	II	6.8	4.3	2.1	48.8372																						7.1	6.8	0.3
2017	5	A	II	6.5	4.6	2.4	52.1739																						6.7	6.5	0.2
2017	5	A	II	6.5	4.5	2.4	53.3333																						6.7	6.5	0.2
2017	5	A	II	7.2	4.7	2.4	51.0638																						7.4	7.2	0.2
2017	5	A	II	7.1	4.6	2.4	52.1739																						7.4	7.1	0.3
2017	5	A	II	6.1	4.4	2.3	52.2727																						6.3	6.1	0.2
2017	5	A	II	6.1	4.3	2.2	51.1628																						6.3	6.1	0.2
2017	5	A	II	5.6	4	2	50																						6.8	5.6	1.2
2017	5	A	II	5.5	3.9	2	51.2821																						6.8	5.5	1.3
2017	5	A	II	6.1	4.1	2.1	51.2195																						6.2	6.1	0.1
2017	5	A	II	7.1	5.1	2.6	50.9804																						7.3	7.1	0.2
2017	5	A	II	5.9	4.1	2	48.7805																						6.1	5.9	0.2
2017	5	A	II	6.3	4.5	2.1	46.6667																						6.5	6.3	0.2
2017	5	A	II	5.7	4	2	50																						5.9	5.7	0.2
2017	5	A	II	7.9	4.9	2.4	48.9796																						8.1	7.9	0.2
2017	5	A	II	6.9	4.8	2.3	47.9167																						7.1	6.9	0.2
2017	5	A	II	6.4	4.4	2.3	52.2727																						6.4	6.4	0
2017	5	A	II	6.8	4.7	2.2	46.8085																						7.1	6.8	0.3
2017	5	A	II	5.8	4.1	2.1	51.2195																						6	5.8	0.2
2017	5	A	III	5.9	4	2	50																						6	5.9	0.1
2017	5	A	III	5.9	3.9	1.9	48.7179																						6	5.9	0.1
2017	5	A	III	6.5	4.4	1.9	43.1818																						6.7	6.5	0.2
2017	5	A	III	6.5	4.3	1.9	44.186																						6.7	6.5	0.2
2017	5	A	III	6.2	4.1	2	48.7805																						6.3	6.2	0.1
2017	5	A	III	6.1	4.1	2	48.7805																						6.2	6.1	0.1
2017	5	A	III	9	6.8	2.6	38.2353																						9.4	9	0.4
2017	5	A	III	9	6.7	2.5	37.3134																						9.3	9	0.3
2017	5	A	III	5.8	3.9	2.1	53.8462																						5.9	5.8	0.1
2017	5	A	III	5.7	3.9	2	51.2821																						5.8	5.7	0.1
2017	5	A	III	5.7	3.9	2	51.2821																						5.8	5.7	0.1
2017	5	A	III	8.5	5.3	2	37.7358																						8.7	8.5	0.2
2017	5	A	III	7.2	4.7	2.1	44.6809																						7.3	7.2	0.1
2017	5	A	III	9.3	6.3	2.9	46.0317																						9.8	9.3	0.5
2017	5	A	III	7.2	4.6	1.9	41.3043																						7.3	7.2	0.1
2017	5	A	III	7	4.2	1.8	42.8571																						7.1	7	0.1
2017	5	A	III	4.5	3	1.2	40																						4.6	4.5	0.1
2017	5	A	III	7.6	5	2.2	44																						8	7.6	0.4
2017	5	A	III	4.7	3.3	1.6	48.4848																						4.9	4.7	0.2
2017	5	A	III	6.3	3.7	1.8	48.6486																						6.4	6.3	0.1
2017	5	A	III	8.3	5.2	2.6	50																						8.7	8.3	0.4
2017	5	A	III	8.3	5.2	2.6	50																						8.7	8.3	0.4
2017	5	A	III	7.5	5.2	2.6	50																						7.8	7.5	0.3
2017	5	A	III	7.5	5.1	2.5	49.0196																						7.7	7.5	0.2
2017	5	A	III	7.5	5.1	2.5	49.0196																						7.7	7.5	0.2
2017	5	A	III	7.5	5.1	2.5	49.0196																						7.7	7.5	0.2
2017	5	A	III	6.9	4.9	2.4	48.9796																						7.1	6.9	0.2
2017	5	A	III	6.9	4.9	2.4	48.9796																						7.1	6.9	0.2
2017	5	A	III	6.2	4.2	2.1	50																						6.4	6.2	0.2
2017	5	A	III	6.1	4.2	2.1	50																						6.4	6.1	0.3
2017	5	A	III	8.1	5.3	2.4	45.283																						8.5	8.1	0.4
2017	5	A	III	7.2	4.9	2	40.8163																						7.5	7.2	0.3
2017	5	A	III	5.1	3.4	1.6	47.0588																						5.4	5.1	0.3
2017	5	A	III	5.3	3.5	1.5	42.8571																						5.5	5.3	0.2
2017	5	A	III	4.8	3.3	1.4	42.4242																						5	4.8	0.2
2017	5	A	III	5.3	3.6	1.4	38.8889																						5.6	5.3	0.3
2017	5	A	III	5.4	3.6	1.6	44.4444																						5.4	5.4	0
2017	5	A	III	7	4.7	2.4	51.0638																						7.4	7	0.4
2017	5	A	III	7.2	4.8	2.3	47.9167																						7.5	7.2	0.3
2017	5	A	III	8.1	5.3	2.6	49.0566																						8.4	8.1	0.3
2017	5	B	I	4.1	3.3	1.3	39.3939																						6.5	4.1	2.4
2017	5	B	I	4	3.2	1.2	37.5																						6.5	4	2.5
2017	5	B	I	4	3.2	2.1	65.625																						6.4	4	2.4
2017	5	B	I	4	3.2	2.1	65.625																						6.3	4	2.3
2017	5	B	I	3.1	2.7	1.2	44.4444																						4.9	3.1	1.8
2017	5	B	I	3.1	2.6	1.1	42.3077																						4.9	3.1	1.8
2017	5	B	I	4.7	4	1.8	45																						7.3	4.7	2.6
2017	5	B	I	4.7	3.9	1.8	46.1538																						7.2	4.7	2.5
2017	5	B	I	4.7	3.6	1.3	36.1111																						7.4	4.7	2.7
2017	5	B	I	4.6	3.5	1.3	37.1429																						7.3	4.6	2.7
2017	5	B	I	4.6	3.5	1.3	37.1429																						5.3	4.6	0.7
2017	5	B	I	2.9	2.3	0.8	34.7826																						4.8	2.9	1.9
2017	5	B	I	3.4	2.6	1.1	42.3077																						5.5	3.4	2.1
2017	5	B	I	6.2	4.6	1.8	39.1304																						9.5	6.2	3.3
2017	5	B	I	4	3.4	1.4	41.1765																						6.3	4	2.3
2017	5	B	I	3.9	3.2	1.6	50																						6	3.9	2.1
2017	5	B	I	4.1	3.2	1.4	43.75																						6.5	4.1	2.4
2017	5	B	I	4.1	3.4	1.4	41.1765																						6.5	4.1	2.4
2017	5	B	I	4.1	3.4	1.4	41.1765																						6.1	4.1	2
2017	5	B	I	4.3	3.5	1.4	40																						6.9	4.3	2.6
2017	5	B	I	4.6	3.7	1.8	48.6486																						6.6	4.6	2
2017	5	B	I	4.5	3.6	1.7	47.2222																						6.6	4.5	2.1
2017	5	B	I	4.8	3.8	1.8	47.3684																						6.9	4.8	2.1
2017	5	B	I	4.7	3.7	1.8	48.6486																						6.8	4.7	2.1
2017	5	B	I	5	4.1	1.6	39.0244																						7.4	5	2.4
2017	5	B	I	5	4	1.6	40																						7.4	5	2.4
2017	5	B	I	4	3.3	1.4	42.4242																						6.1	4	2.1
2017	5	B	I	4	3.2	1.4	43.75																						6	4	2
2017	5	B	I	6	4.8	2.1	43.75																						9.3	6	3.3
2017	5	B	I	5.9	4.7	2.1	44.6809																						9.3	5.9	3.4
2017	5	B	I	5.5	4.3	1.9	44.186																						8.4	5.5	2.9
2017	5	B	I	3.9	3.2	1.5	46.875																						6.1	3.9	2.2
2017	5	B	I	4.7	3.7	1.5	40.5405																						7	4.7	2.3
2017	5	B	I	4.4	3.4	1.5	44.1176																						6.4	4.4	2
2017	5	B	I	4.1	3.5	1.8	51.4286																						6.1	4.1	2
2017	5	B	I	3.5	3.1	1.3	41.9355																						5	3.5	1.5
2017	5	B	I	3.9	3.1	1.4	45.1613																						6.1	3.9	2.2
2017	5	B	I	3.9	3.1	1.4	45.1613																						7.1	3.9	3.2
2017	5	B	I	4.3	3.5	1.4	40																						6.9	4.3	2.6
2017	5	B	I	4	3.3	1.6	48.4848																						6.1	4	2.1
2017	5	B	II	5.6	3.9	2	51.2821																						5.8	5.6	0.2
2017	5	B	II	5.5	3.9	1.9	48.7179																						5.8	5.5	0.3
2017	5	B	II	5.2	4	2.9	72.5																						5.4	5.2	0.2
2017	5	B	II	5.2	3.9	2.8	71.7949																						5.4	5.2	0.2
2017	5	B	II	7.5	4.8	2.1	43.75																						7.7	7.5	0.2
2017	5	B	II	7.5	4.8	2.1	43.75																						7.7	7.5	0.2
2017	5	B	II	6.7	4.5	2.1	46.6667																						7	6.7	0.3
2017	5	B	II	6.7	4.4	2	45.4545																						7	6.7	0.3
2017	5	B	II	6	4.3	2.2	51.1628																						6.2	6	0.2
2017	5	B	II	6	4.3	2.1	48.8372																						6.1	6	0.1
2017	5	B	II	6.9	4.6	2.2	47.8261																						7.1	6.9	0.2
2017	5	B	II	6.1	4.3	1.9	44.186																						6.1	6.1	0
2017	5	B	II	8.3	5.2	2.6	50																						8.4	8.3	0.1
2017	5	B	II	6.4	4.5	2.3	51.1111																						6.6	6.4	0.2
2017	5	B	II	7.1	5	2.3	46																						7.4	7.1	0.3
2017	5	B	II	7.3	4.9	2.4	48.9796																						7.7	7.3	0.4
2017	5	B	II	10	6	2.8	46.6667																						10.3	10	0.3
2017	5	B	II	5.3	3.6	1.8	50																						5.5	5.3	0.2
2017	5	B	II	6	4.2	2.1	50																						6.1	6	0.1
2017	5	B	II	9.5	5.7	2.5	43.8596																						9.9	9.5	0.4
2017	5	B	II	6.1	4.2	1.9	45.2381																						6.3	6.1	0.2
2017	5	B	II	6.1	4.2	1.9	45.2381																						6.3	6.1	0.2
2017	5	B	II	7.1	4.8	2.5	52.0833																						7.4	7.1	0.3
2017	5	B	II	7.1	4.8	2.5	52.0833																						7.3	7.1	0.2
2017	5	B	II	8.1	5.2	2.3	44.2308																						8.3	8.1	0.2
2017	5	B	II	8	5.2	2.3	44.2308																						8.3	8	0.3
2017	5	B	II	5.8	3.7	1.7	45.9459																						6.1	5.8	0.3
2017	5	B	II	5.7	3.7	1.7	45.9459																						6.1	5.7	0.4
2017	5	B	II	7.7	5.1	2.4	47.0588																						8	7.7	0.3
2017	5	B	II	7.7	5	2.3	46																						8	7.7	0.3
2017	5	B	II	5.9	3.2	1.4	43.75																						6	5.9	0.1
2017	5	B	II	7.5	5.1	2.4	47.0588																						8.1	7.5	0.6
2017	5	B	II	7.6	5	2.4	48																						7.9	7.6	0.3
2017	5	B	II	8.6	5.1	2.2	43.1373																						8.9	8.6	0.3
2017	5	B	II	6.8	4.6	2.1	45.6522																						7.2	6.8	0.4
2017	5	B	II	6.1	4.2	2.1	50																						6.4	6.1	0.3
2017	5	B	II	7	5.1	2.6	50.9804																						7.1	7	0.1
2017	5	B	II	6.2	4.5	2.4	53.3333																						6.4	6.2	0.2
2017	5	B	II	6.8	4.7	2.4	51.0638																						6.9	6.8	0.1
2017	5	B	II	6	4	2	50																						6.3	6	0.3
2017	5	B	III	5.8	4.1	2.1	51.2195																						5.6	5.8	-0.2
2017	5	B	III	5.7	4.1	2.1	51.2195																						5.5	5.7	-0.2
2017	5	B	III	6.6	4.3	1.9	44.186																						6.8	6.6	0.2
2017	5	B	III	6.5	4.3	1.9	44.186																						6.7	6.5	0.2
2017	5	B	III	6.1	4.4	2.2	50																						6.3	6.1	0.2
2017	5	B	III	6	4.4	2.2	50																						6.2	6	0.2
2017	5	B	III	5.2	3.7	1.5	40.5405																						5.5	5.2	0.3
2017	5	B	III	5.2	3.6	1.5	41.6667																						5.4	5.2	0.2
2017	5	B	III	6	4.2	2	47.619																						6.1	6	0.1
2017	5	B	III	5.9	4.1	2	48.7805																						6	5.9	0.1
2017	5	B	III	9.6	5.8	2.5	43.1034																						9.8	9.6	0.2
2017	5	B	III	9.1	5.6	2.6	46.4286																						9.4	9.1	0.3
2017	5	B	III	7.3	4.5	1.8	40																						7.5	7.3	0.2
2017	5	B	III	7.1	4.6	2.4	52.1739																						7.1	7.1	0
2017	5	B	III	5.4	4.1	2.1	51.2195																						5.5	5.4	0.1
2017	5	B	III	7.1	4.7	2	42.5532																						7.2	7.1	0.1
2017	5	B	III	7.9	4.8	2.2	45.8333																						8.3	7.9	0.4
2017	5	B	III	6.9	4.6	1.8	39.1304																						7.2	6.9	0.3
2017	5	B	III	7.8	4.8	2.1	43.75																						8	7.8	0.2
2017	5	B	III	8.1	5.5	2.5	45.4545																						8.3	8.1	0.2
2017	5	B	III	6	4.2	2.2	52.381																						6.2	6	0.2
2017	5	B	III	5.9	4.2	2.2	52.381																						6.2	5.9	0.3
2017	5	B	III	5.9	4.2	2.2	52.381																						6.2	5.9	0.3
2017	5	B	III	5.9	4.2	2.2	52.381																						6.2	5.9	0.3
2017	5	B	III	6.3	4.2	2	47.619																						6.4	6.3	0.1
2017	5	B	III	6.2	4.3	2	46.5116																						6.4	6.2	0.2
2017	5	B	III	6.4	4.3	2.3	53.4884																						6.5	6.4	0.1
2017	5	B	III	6.3	4.3	2.2	51.1628																						6.5	6.3	0.2
2017	5	B	III	6.5	4.7	2.4	51.0638																						6.7	6.5	0.2
2017	5	B	III	6.4	4.7	2.3	48.9362																						6.6	6.4	0.2
2017	5	B	III	7.4	4.4	2.1	47.7273																						7.6	7.4	0.2
2017	5	B	III	6.6	4.3	2.2	51.1628																						6.8	6.6	0.2
2017	5	B	III	5.8	3.9	2.1	53.8462																						5.8	5.8	0
2017	5	B	III	5.5	3.8	1.5	39.4737																						5.7	5.5	0.2
2017	5	B	III	5.2	3.8	1.6	42.1053																						5.5	5.2	0.3
2017	5	B	III	5.7	4.1	2	48.7805																						5.9	5.7	0.2
2017	5	B	III	7.5	5	2.4	48																						7.7	7.5	0.2
2017	5	B	III	6.6	4.3	2.1	48.8372																						6.6	6.6	0
2017	5	B	III	4.9	3.4	1.9	55.8824																						5	4.9	0.1
2017	5	B	III	6.2	4	2.2	55																						6.3	6.2	0.1
2017	5	C	I	6.2	4.7	2	42.5532																						9.2	6.2	3
2017	5	C	I	6.2	4.7	2	42.5532																						9.2	6.2	3
2017	5	C	I	4.3	3.7	1.7	45.9459																						6.3	4.3	2
2017	5	C	I	4.2	3.7	1.6	43.2432																						6.3	4.2	2.1
2017	5	C	I	4.2	3.4	1.3	38.2353																						6.1	4.2	1.9
2017	5	C	I	4.1	3.4	1.2	35.2941																						6	4.1	1.9
2017	5	C	I	4.1	3.6	1.7	47.2222																						6.3	4.1	2.2
2017	5	C	I	4	3.5	1.7	48.5714																						6.2	4	2.2
2017	5	C	I	4.1	3.6	1.7	47.2222																						7	4.1	2.9
2017	5	C	I	4	3.5	1.7	48.5714																						7	4	3
2017	5	C	I	5.6	4.3	1.7	39.5349																						8.2	5.6	2.6
2017	5	C	I	5.6	4.3	1.7	39.5349																						8.1	5.6	2.5
2017	5	C	I	5.4	4.4	2	45.4545																						8.2	5.4	2.8
2017	5	C	I	5.4	4.4	2	45.4545																						8.3	5.4	2.9
2017	5	C	I	5.4	4.4	2	45.4545																						9.3	5.4	3.9
2017	5	C	I	2.9	2.2	1	45.4545																						4.7	2.9	1.8
2017	5	C	I	4	3.1	1.1	35.4839																						6.1	4	2.1
2017	5	C	I	6	4.4	1.5	34.0909																						9.1	6	3.1
2017	5	C	I	5.4	4.3	1.7	39.5349																						7	5.4	1.6
2017	5	C	I	4.9	4.1	1.7	41.4634																						7.4	4.9	2.5
2017	5	C	I	3.7	3.1	1.4	45.1613																						5.4	3.7	1.7
2017	5	C	I	3.6	3	1.3	43.3333																						5.3	3.6	1.7
2017	5	C	I	4.7	3.7	2	54.0541																						6.8	4.7	2.1
2017	5	C	I	4.7	3.6	1.9	52.7778																						6.7	4.7	2
2017	5	C	I	4	3.4	1.5	44.1176																						6.2	4	2.2
2017	5	C	I	3.9	3.4	1.5	44.1176																						6.2	3.9	2.3
2017	5	C	I	4.3	3.5	1.7	48.5714																						6.1	4.3	1.8
2017	5	C	I	4.3	3.4	1.7	50																						6.1	4.3	1.8
2017	5	C	I	3.8	3.2	1.5	46.875																						5.8	3.8	2
2017	5	C	I	3.8	3.1	1.5	48.3871																						5.7	3.8	1.9
2017	5	C	I	3.1	2.5	1.3	52																						4.6	3.1	1.5
2017	5	C	I	3.1	2.7	1.3	48.1481																						4.9	3.1	1.8
2017	5	C	I	3.8	3.1	1.4	45.1613																						5.9	3.8	2.1
2017	5	C	I	3.6	2.9	1	34.4828																						5.5	3.6	1.9
2017	5	C	I	4.7	3.7	1.7	45.9459																						7.6	4.7	2.9
2017	5	C	I	4.3	3.5	1.7	48.5714																						6.7	4.3	2.4
2017	5	C	I	4	3.4	1.6	47.0588																						5.9	4	1.9
2017	5	C	I	3.7	2.8	1.3	46.4286																						5	3.7	1.3
2017	5	C	I	4.7	3.7	1.4	37.8378																						7.2	4.7	2.5
2017	5	C	I	4.3	3.7	1.6	43.2432																						6.9	4.3	2.6
2017	5	C	II	5.5	3.9	1.5	38.4615																						5.9	5.5	0.4
2017	5	C	II	5.5	3.8	1.5	39.4737																						5.9	5.5	0.4
2017	5	C	II	7.5	4.8	2.2	45.8333																						8	7.5	0.5
2017	5	C	II	7.4	4.8	2.2	45.8333																						8	7.4	0.6
2017	5	C	II	6.3	4.2	2.1	50																						6.7	6.3	0.4
2017	5	C	II	6.2	4.1	2.1	51.2195																						6.7	6.2	0.5
2017	5	C	II	9	5.9	3	50.8475																						9.5	9	0.5
2017	5	C	II	8.9	5.9	3	50.8475																						9.5	8.9	0.6
2017	5	C	II	5.5	3.9	2.2	56.4103																						5.8	5.5	0.3
2017	5	C	II	5.4	3.9	2.1	53.8462																						5.7	5.4	0.3
2017	5	C	II	9.1	5.5	2.2	40																						9.6	9.1	0.5
2017	5	C	II	7.8	5.2	2.4	46.1538																						8.4	7.8	0.6
2017	5	C	II	4.9	3.6	2	55.5556																						5.5	4.9	0.6
2017	5	C	II	6.3	4.5	2.2	48.8889																						6.9	6.3	0.6
2017	5	C	II	7.3	5.2	2.7	51.9231																						7.7	7.3	0.4
2017	5	C	II	5.7	4.1	2.1	51.2195																						6.2	5.7	0.5
2017	5	C	II	6.7	4.6	2.3	50																						7.3	6.7	0.6
2017	5	C	II	7.2	5	2.2	44																						7.9	7.2	0.7
2017	5	C	II	5.7	4.3	2.1	48.8372																						6.1	5.7	0.4
2017	5	C	II	7.6	5.1	2.5	49.0196																						8.2	7.6	0.6
2017	5	C	II	7.6	5.1	2.5	49.0196																						8.2	7.6	0.6
2017	5	C	II	7.6	5.1	2.5	49.0196																						8.2	7.6	0.6
2017	5	C	II	7.8	5.1	2.6	50.9804																						8.1	7.8	0.3
2017	5	C	II	7.8	5.1	2.5	49.0196																						8.1	7.8	0.3
2017	5	C	II	7.2	5.2	2.7	51.9231																						7.6	7.2	0.4
2017	5	C	II	7.1	5.1	2.6	50.9804																						7.5	7.1	0.4
2017	5	C	II	6.1	4.2	2.1	50																						6.4	6.1	0.3
2017	5	C	II	6.1	4.2	2.1	50																						6.4	6.1	0.3
2017	5	C	II	6.1	4.2	2.1	50																						6.4	6.1	0.3
2017	5	C	II	6.1	4.2	2.1	50																						6.4	6.1	0.3
2017	5	C	II	7.4	4.4	1.9	43.1818																						7.7	7.4	0.3
2017	5	C	II	6.7	4.5	2	44.4444																						7	6.7	0.3
2017	5	C	II	8.6	5.4	2.6	48.1481																						9.1	8.6	0.5
2017	5	C	II	8.9	5.4	2.4	44.4444																						9.3	8.9	0.4
2017	5	C	II	5.5	3.8	1.8	47.3684																						5.7	5.5	0.2
2017	5	C	II	7.6	5.3	2.6	49.0566																						8	7.6	0.4
2017	5	C	II	7.7	5	2.5	50																						8.3	7.7	0.6
2017	5	C	II	6.2	4.1	1.6	39.0244																						6.6	6.2	0.4
2017	5	C	II	7.4	5	2.3	46																						7.8	7.4	0.4
2017	5	C	II	7	4.5	2.1	46.6667																						7.5	7	0.5
2017	5	C	III	5.5	4.2	1.8	42.8571																						5.7	5.5	0.2
2017	5	C	III	5.5	4.2	1.8	42.8571																						5.7	5.5	0.2
2017	5	C	III	7.2	5.1	2.6	50.9804																						7.3	7.2	0.1
2017	5	C	III	7.1	5.1	2.6	50.9804																						7.2	7.1	0.1
2017	5	C	III	8.5	5.9	2.9	49.1525																						8.6	8.5	0.1
2017	5	C	III	8.4	5.8	2.9	50																						8.6	8.4	0.2
2017	5	C	III	4.8	3.6	1.8	50																						5	4.8	0.2
2017	5	C	III	4.9	3.5	1.8	51.4286																						4.9	4.9	0
2017	5	C	III	5.1	3.7	2.1	56.7568																						5.1	5.1	0
2017	5	C	III	5	3.7	2	54.0541																						5	5	0
2017	5	C	III	7.6	4.9	2.1	42.8571																						8.1	7.6	0.5
2017	5	C	III	7.4	5.1	2.5	49.0196																						7.6	7.4	0.2
2017	5	C	III	8.3	5	1.8	36																						8.4	8.3	0.1
2017	5	C	III	8.1	5.2	2.3	44.2308																						8.5	8.1	0.4
2017	5	C	III	7.1	5.1	2.6	50.9804																						7.1	7.1	0
2017	5	C	III	7.1	5.1	2.6	50.9804																						7.3	7.1	0.2
2017	5	C	III	6.1	4.3	1.9	44.186																						6.4	6.1	0.3
2017	5	C	III	6.9	4.5	2	44.4444																						7.1	6.9	0.2
2017	5	C	III	5.9	4	1.9	47.5																						6.1	5.9	0.2
2017	5	C	III	5.4	3.7	1.4	37.8378																						5.5	5.4	0.1
2017	5	C	III	7.2	4.8	2.5	52.0833																						7.5	7.2	0.3
2017	5	C	III	7.2	4.8	2.4	50																						7.4	7.2	0.2
2017	5	C	III	6.1	4.2	1.7	40.4762																						6.4	6.1	0.3
2017	5	C	III	6.1	4.2	1.6	38.0952																						6.4	6.1	0.3
2017	5	C	III	8.1	5.6	2.7	48.2143																						8.5	8.1	0.4
2017	5	C	III	8	5.5	2.7	49.0909																						8.4	8	0.4
2017	5	C	III	4.5	3.4	1.9	55.8824																						4.7	4.5	0.2
2017	5	C	III	4.4	3.4	1.8	52.9412																						4.6	4.4	0.2
2017	5	C	III	4.9	3.4	1.7	50																						5	4.9	0.1
2017	5	C	III	4.8	3.4	1.6	47.0588																						5	4.8	0.2
2017	5	C	III	7.5	5.4	2.7	50																						7.8	7.5	0.3
2017	5	C	III	5.8	4.2	2.2	52.381																						5.9	5.8	0.1
2017	5	C	III	6.6	4.7	2.3	48.9362																						6.7	6.6	0.1
2017	5	C	III	5.3	3.6	1.5	41.6667																						5.5	5.3	0.2
2017	5	C	III	5.3	3.6	1.5	41.6667																						5.5	5.3	0.2
2017	5	C	III	6	3.9	1.9	48.7179																						6.2	6	0.2
2017	5	C	III	6	3.9	1.9	48.7179																						6.2	6	0.2
2017	5	C	III	7.5	5	2.6	52																						7.9	7.5	0.4
2017	5	C	III	6.1	4.3	2.3	53.4884																						6.3	6.1	0.2
2017	5	C	III	7.6	4.9	2.1	42.8571																						8	7.6	0.4
2017	6	A	I	2.6	2.3	1	43.4783																						3.4	2.6	0.8
2017	6	A	I	3.3	2.9	0.9	31.0345																						4.1	3.3	0.8
2017	6	A	I	2.8	2.4	1	41.6667																						3.5	2.8	0.7
2017	6	A	I	2.7	2.3	1	43.4783																						3.4	2.7	0.7
2017	6	A	I	3.1	2.7	0.9	33.3333																						4	3.1	0.9
2017	6	A	I	3.1	2.7	0.9	33.3333																						4	3.1	0.9
2017	6	A	I	3	2.6	1	38.4615																						3.8	3	0.8
2017	6	A	I	2.9	2.5	1	40																						3.8	2.9	0.9
2017	6	A	I	3.6	3.1	1	32.2581																						4.7	3.6	1.1
2017	6	A	I	3.5	3	1	33.3333																						4.6	3.5	1.1
2017	6	A	I	2.6	2.3	1	43.4783																						3.4	2.6	0.8
2017	6	A	I	3.3	2.9	0.9	31.0345																						4.1	3.3	0.8
2017	6	A	I	2.8	2.4	1	41.6667																						3.5	2.8	0.7
2017	6	A	I	2.7	2.3	1	43.4783																						3.4	2.7	0.7
2017	6	A	I	3.1	2.7	0.9	33.3333																						4	3.1	0.9
2017	6	A	I	3.1	2.7	0.9	33.3333																						4	3.1	0.9
2017	6	A	I	3	2.6	1	38.4615																						3.8	3	0.8
2017	6	A	I	2.9	2.5	1	40																						3.8	2.9	0.9
2017	6	A	I	3.6	3.1	1	32.2581																						4.7	3.6	1.1
2017	6	A	I	3.5	3	1	33.3333																						4.6	3.5	1.1
2017	6	A	I	2.6	2.3	1	43.4783																						3.4	2.6	0.8
2017	6	A	I	3.3	2.9	0.9	31.0345																						4.1	3.3	0.8
2017	6	A	I	2.8	2.4	1	41.6667																						3.5	2.8	0.7
2017	6	A	I	2.7	2.3	1	43.4783																						3.4	2.7	0.7
2017	6	A	I	3.1	2.7	0.9	33.3333																						4	3.1	0.9
2017	6	A	I	3.1	2.7	0.9	33.3333																						4	3.1	0.9
2017	6	A	I	3	2.6	1	38.4615																						3.8	3	0.8
2017	6	A	I	2.9	2.5	1	40																						3.8	2.9	0.9
2017	6	A	I	3.6	3.1	1	32.2581																						4.7	3.6	1.1
2017	6	A	I	3.5	3	1	33.3333																						4.6	3.5	1.1
2017	6	A	I	2.6	2.3	1	43.4783																						3.4	2.6	0.8
2017	6	A	I	3.3	2.9	0.9	31.0345																						4.1	3.3	0.8
2017	6	A	I	2.8	2.4	1	41.6667																						3.5	2.8	0.7
2017	6	A	I	2.7	2.3	1	43.4783																						3.4	2.7	0.7
2017	6	A	I	3.1	2.7	0.9	33.3333																						4	3.1	0.9
2017	6	A	I	3.1	2.7	0.9	33.3333																						4	3.1	0.9
2017	6	A	I	3	2.6	1	38.4615																						3.8	3	0.8
2017	6	A	I	2.9	2.5	1	40																						3.8	2.9	0.9
2017	6	A	I	3.6	3.1	1	32.2581																						4.7	3.6	1.1
2017	6	A	I	3.5	3	1	33.3333																						4.6	3.5	1.1
2017	6	A	II	4.6	3.7	1.2	32.4324																						8.6	4.6	4
2017	6	A	II	4.7	4	1.3	32.5																						8.2	4.7	3.5
2017	6	A	II	3.3	2.8	1.3	46.4286																						5.6	3.3	2.3
2017	6	A	II	5.2	4.5	2	44.4444																						9.1	5.2	3.9
2017	6	A	II	4.1	3.5	1.5	42.8571																						7	4.1	2.9
2017	6	A	II	4	3.5	1.4	40																						6.9	4	2.9
2017	6	A	II	3.7	3.2	1.3	40.625																						6.1	3.7	2.4
2017	6	A	II	3.6	3.1	1.2	38.7097																						6.1	3.6	2.5
2017	6	A	II	4.4	3.8	1.6	42.1053																						7.3	4.4	2.9
2017	6	A	II	4.3	3.7	1.6	43.2432																						7.3	4.3	3
2017	6	A	II	4.6	3.7	1.2	32.4324																						8.6	4.6	4
2017	6	A	II	4.7	4	1.3	32.5																						8.2	4.7	3.5
2017	6	A	II	3.3	2.8	1.3	46.4286																						5.6	3.3	2.3
2017	6	A	II	5.2	4.5	2	44.4444																						9.1	5.2	3.9
2017	6	A	II	4.1	3.5	1.5	42.8571																						7	4.1	2.9
2017	6	A	II	4	3.5	1.4	40																						6.9	4	2.9
2017	6	A	II	3.7	3.2	1.3	40.625																						6.1	3.7	2.4
2017	6	A	II	3.6	3.1	1.2	38.7097																						6.1	3.6	2.5
2017	6	A	II	4.4	3.8	1.6	42.1053																						7.3	4.4	2.9
2017	6	A	II	4.3	3.7	1.6	43.2432																						7.3	4.3	3
2017	6	A	II	4.6	3.7	1.2	32.4324																						8.6	4.6	4
2017	6	A	II	4.7	4	1.3	32.5																						8.2	4.7	3.5
2017	6	A	II	3.3	2.8	1.3	46.4286																						5.6	3.3	2.3
2017	6	A	II	5.2	4.5	2	44.4444																						9.1	5.2	3.9
2017	6	A	II	4.1	3.5	1.5	42.8571																						7	4.1	2.9
2017	6	A	II	4	3.5	1.4	40																						6.9	4	2.9
2017	6	A	II	3.7	3.2	1.3	40.625																						6.1	3.7	2.4
2017	6	A	II	3.6	3.1	1.2	38.7097																						6.1	3.6	2.5
2017	6	A	II	4.4	3.8	1.6	42.1053																						7.3	4.4	2.9
2017	6	A	II	4.3	3.7	1.6	43.2432																						7.3	4.3	3
2017	6	A	II	4.6	3.7	1.2	32.4324																						8.6	4.6	4
2017	6	A	II	4.7	4	1.3	32.5																						8.2	4.7	3.5
2017	6	A	II	3.3	2.8	1.3	46.4286																						5.6	3.3	2.3
2017	6	A	II	5.2	4.5	2	44.4444																						9.1	5.2	3.9
2017	6	A	II	4.1	3.5	1.5	42.8571																						7	4.1	2.9
2017	6	A	II	4	3.5	1.4	40																						6.9	4	2.9
2017	6	A	II	3.7	3.2	1.3	40.625																						6.1	3.7	2.4
2017	6	A	II	3.6	3.1	1.2	38.7097																						6.1	3.6	2.5
2017	6	A	II	4.4	3.8	1.6	42.1053																						7.3	4.4	2.9
2017	6	A	II	4.3	3.7	1.6	43.2432																						7.3	4.3	3
2017	6	A	III	4.8	3.8	1.2	31.5789																						9	4.8	4.2
2017	6	A	III	4.7	3.8	1.1	28.9474																						8.9	4.7	4.2
2017	6	A	III	4.3	3.7	1.6	43.2432																						7.3	4.3	3
2017	6	A	III	4.2	3.6	1.5	41.6667																						7.3	4.2	3.1
2017	6	A	III	3.6	3	1.2	40																						6.3	3.6	2.7
2017	6	A	III	3.5	3	1.2	40																						6.2	3.5	2.7
2017	6	A	III	3.9	3.3	1.2	36.3636																						7	3.9	3.1
2017	6	A	III	3.8	3.2	1.2	37.5																						7	3.8	3.2
2017	6	A	III	5.7	4.6	1.8	39.1304																						10.6	5.7	4.9
2017	6	A	III	5.3	4.3	1.6	37.2093																						9.6	5.3	4.3
2017	6	A	III	4.8	3.8	1.2	31.5789																						9	4.8	4.2
2017	6	A	III	4.7	3.8	1.1	28.9474																						8.9	4.7	4.2
2017	6	A	III	4.3	3.7	1.6	43.2432																						7.3	4.3	3
2017	6	A	III	4.2	3.6	1.5	41.6667																						7.3	4.2	3.1
2017	6	A	III	3.6	3	1.2	40																						6.3	3.6	2.7
2017	6	A	III	3.5	3	1.2	40																						6.2	3.5	2.7
2017	6	A	III	3.9	3.3	1.2	36.3636																						7	3.9	3.1
2017	6	A	III	3.8	3.2	1.2	37.5																						7	3.8	3.2
2017	6	A	III	5.7	4.6	1.8	39.1304																						10.6	5.7	4.9
2017	6	A	III	5.3	4.3	1.6	37.2093																						9.6	5.3	4.3
2017	6	A	III	4.8	3.8	1.2	31.5789																						9	4.8	4.2
2017	6	A	III	4.7	3.8	1.1	28.9474																						8.9	4.7	4.2
2017	6	A	III	4.3	3.7	1.6	43.2432																						7.3	4.3	3
2017	6	A	III	4.2	3.6	1.5	41.6667																						7.3	4.2	3.1
2017	6	A	III	3.6	3	1.2	40																						6.3	3.6	2.7
2017	6	A	III	3.5	3	1.2	40																						6.2	3.5	2.7
2017	6	A	III	3.9	3.3	1.2	36.3636																						7	3.9	3.1
2017	6	A	III	3.8	3.2	1.2	37.5																						7	3.8	3.2
2017	6	A	III	5.7	4.6	1.8	39.1304																						10.6	5.7	4.9
2017	6	A	III	5.3	4.3	1.6	37.2093																						9.6	5.3	4.3
2017	6	A	III	4.8	3.8	1.2	31.5789																						9	4.8	4.2
2017	6	A	III	4.7	3.8	1.1	28.9474																						8.9	4.7	4.2
2017	6	A	III	4.3	3.7	1.6	43.2432																						7.3	4.3	3
2017	6	A	III	4.2	3.6	1.5	41.6667																						7.3	4.2	3.1
2017	6	A	III	3.6	3	1.2	40																						6.3	3.6	2.7
2017	6	A	III	3.5	3	1.2	40																						6.2	3.5	2.7
2017	6	A	III	3.9	3.3	1.2	36.3636																						7	3.9	3.1
2017	6	A	III	3.8	3.2	1.2	37.5																						7	3.8	3.2
2017	6	A	III	5.7	4.6	1.8	39.1304																						10.6	5.7	4.9
2017	6	A	III	5.3	4.3	1.6	37.2093																						9.6	5.3	4.3
2017	6	B	I	3	2.6	0.8	30.7692																						3.9	3	0.9
2017	6	B	I	3	2.5	0.8	32																						3.9	3	0.9
2017	6	B	I	3.3	2.8	1.2	42.8571																						4.3	3.3	1
2017	6	B	I	3.3	2.7	1.1	40.7407																						4.2	3.3	0.9
2017	6	B	I	4.2	3.5	1.3	37.1429																						5.7	4.2	1.5
2017	6	B	I	4.2	3.4	1.3	38.2353																						5.7	4.2	1.5
2017	6	B	I	4	3.5	1.1	31.4286																						5.6	4	1.6
2017	6	B	I	4	3.5	1	28.5714																						5.6	4	1.6
2017	6	B	I	3.6	3.1	1.2	38.7097																						5.5	3.6	1.9
2017	6	B	I	3.9	3.6	1.2	33.3333																						5.7	3.9	1.8
2017	6	B	I	3	2.6	0.8	30.7692																						3.9	3	0.9
2017	6	B	I	3	2.5	0.8	32																						3.9	3	0.9
2017	6	B	I	3.3	2.8	1.2	42.8571																						4.3	3.3	1
2017	6	B	I	3.3	2.7	1.1	40.7407																						4.2	3.3	0.9
2017	6	B	I	4.2	3.5	1.3	37.1429																						5.7	4.2	1.5
2017	6	B	I	4.2	3.4	1.3	38.2353																						5.7	4.2	1.5
2017	6	B	I	4	3.5	1.1	31.4286																						5.6	4	1.6
2017	6	B	I	4	3.5	1	28.5714																						5.6	4	1.6
2017	6	B	I	3.6	3.1	1.2	38.7097																						5.5	3.6	1.9
2017	6	B	I	3.9	3.6	1.2	33.3333																						5.7	3.9	1.8
2017	6	B	I	3	2.6	0.8	30.7692																						3.9	3	0.9
2017	6	B	I	3	2.5	0.8	32																						3.9	3	0.9
2017	6	B	I	3.3	2.8	1.2	42.8571																						4.3	3.3	1
2017	6	B	I	3.3	2.7	1.1	40.7407																						4.2	3.3	0.9
2017	6	B	I	4.2	3.5	1.3	37.1429																						5.7	4.2	1.5
2017	6	B	I	4.2	3.4	1.3	38.2353																						5.7	4.2	1.5
2017	6	B	I	4	3.5	1.1	31.4286																						5.6	4	1.6
2017	6	B	I	4	3.5	1	28.5714																						5.6	4	1.6
2017	6	B	I	3.6	3.1	1.2	38.7097																						5.5	3.6	1.9
2017	6	B	I	3.9	3.6	1.2	33.3333																						5.7	3.9	1.8
2017	6	B	I	3	2.6	0.8	30.7692																						3.9	3	0.9
2017	6	B	I	3	2.5	0.8	32																						3.9	3	0.9
2017	6	B	I	3.3	2.8	1.2	42.8571																						4.3	3.3	1
2017	6	B	I	3.3	2.7	1.1	40.7407																						4.2	3.3	0.9
2017	6	B	I	4.2	3.5	1.3	37.1429																						5.7	4.2	1.5
2017	6	B	I	4.2	3.4	1.3	38.2353																						5.7	4.2	1.5
2017	6	B	I	4	3.5	1.1	31.4286																						5.6	4	1.6
2017	6	B	I	4	3.5	1	28.5714																						5.6	4	1.6
2017	6	B	I	3.6	3.1	1.2	38.7097																						5.5	3.6	1.9
2017	6	B	I	3.9	3.6	1.2	33.3333																						5.7	3.9	1.8
2017	6	B	II	4.6	4	1.7	42.5																						7.6	4.6	3
2017	6	B	II	4.3	3.6	1.4	38.8889																						7.6	4.3	3.3
2017	6	B	II	4.3	3.7	1.5	40.5405																						7.5	4.3	3.2
2017	6	B	II	3.7	3	1	33.3333																						6.6	3.7	2.9
2017	6	B	II	4.3	3.6	1.7	47.2222																						7.1	4.3	2.8
2017	6	B	II	4.2	3.6	1.7	47.2222																						7	4.2	2.8
2017	6	B	II	3.6	3.2	1.2	37.5																						6	3.6	2.4
2017	6	B	II	3.6	3.2	1.1	34.375																						6	3.6	2.4
2017	6	B	II	3.4	3	1.4	46.6667																						5.7	3.4	2.3
2017	6	B	II	3.4	3	1.3	43.3333																						5.6	3.4	2.2
2017	6	B	II	4.6	4	1.7	42.5																						7.6	4.6	3
2017	6	B	II	4.3	3.6	1.4	38.8889																						7.6	4.3	3.3
2017	6	B	II	4.3	3.7	1.5	40.5405																						7.5	4.3	3.2
2017	6	B	II	3.7	3	1	33.3333																						6.6	3.7	2.9
2017	6	B	II	4.3	3.6	1.7	47.2222																						7.1	4.3	2.8
2017	6	B	II	4.2	3.6	1.7	47.2222																						7	4.2	2.8
2017	6	B	II	3.6	3.2	1.2	37.5																						6	3.6	2.4
2017	6	B	II	3.6	3.2	1.1	34.375																						6	3.6	2.4
2017	6	B	II	3.4	3	1.4	46.6667																						5.7	3.4	2.3
2017	6	B	II	3.4	3	1.3	43.3333																						5.6	3.4	2.2
2017	6	B	II	4.6	4	1.7	42.5																						7.6	4.6	3
2017	6	B	II	4.3	3.6	1.4	38.8889																						7.6	4.3	3.3
2017	6	B	II	4.3	3.7	1.5	40.5405																						7.5	4.3	3.2
2017	6	B	II	3.7	3	1	33.3333																						6.6	3.7	2.9
2017	6	B	II	4.3	3.6	1.7	47.2222																						7.1	4.3	2.8
2017	6	B	II	4.2	3.6	1.7	47.2222																						7	4.2	2.8
2017	6	B	II	3.6	3.2	1.2	37.5																						6	3.6	2.4
2017	6	B	II	3.6	3.2	1.1	34.375																						6	3.6	2.4
2017	6	B	II	3.4	3	1.4	46.6667																						5.7	3.4	2.3
2017	6	B	II	3.4	3	1.3	43.3333																						5.6	3.4	2.2
2017	6	B	II	4.6	4	1.7	42.5																						7.6	4.6	3
2017	6	B	II	4.3	3.6	1.4	38.8889																						7.6	4.3	3.3
2017	6	B	II	4.3	3.7	1.5	40.5405																						7.5	4.3	3.2
2017	6	B	II	3.7	3	1	33.3333																						6.6	3.7	2.9
2017	6	B	II	4.3	3.6	1.7	47.2222																						7.1	4.3	2.8
2017	6	B	II	4.2	3.6	1.7	47.2222																						7	4.2	2.8
2017	6	B	II	3.6	3.2	1.2	37.5																						6	3.6	2.4
2017	6	B	II	3.6	3.2	1.1	34.375																						6	3.6	2.4
2017	6	B	II	3.4	3	1.4	46.6667																						5.7	3.4	2.3
2017	6	B	II	3.4	3	1.3	43.3333																						5.6	3.4	2.2
2017	6	B	III	3.8	3.3	1.3	39.3939																						7	3.8	3.2
2017	6	B	III	3.8	3.3	1.3	39.3939																						6.9	3.8	3.1
2017	6	B	III	4.7	4	1.5	37.5																						8.2	4.7	3.5
2017	6	B	III	4.6	4	1.5	37.5																						8.2	4.6	3.6
2017	6	B	III	3.7	3.1	1.3	41.9355																						6.4	3.7	2.7
2017	6	B	III	3.6	3.1	1.2	38.7097																						6.3	3.6	2.7
2017	6	B	III	5.7	4.6	1.3	28.2609																						8.7	5.7	3
2017	6	B	III	4.7	3.9	1.5	38.4615																						8.4	4.7	3.7
2017	6	B	III	5.3	4.5	1.6	35.5556																						9.4	5.3	4.1
2017	6	B	III	4.4	3.8	1.7	44.7368																						6.7	4.4	2.3
2017	6	B	III	3.8	3.3	1.3	39.3939																						7	3.8	3.2
2017	6	B	III	3.8	3.3	1.3	39.3939																						6.9	3.8	3.1
2017	6	B	III	4.7	4	1.5	37.5																						8.2	4.7	3.5
2017	6	B	III	4.6	4	1.5	37.5																						8.2	4.6	3.6
2017	6	B	III	3.7	3.1	1.3	41.9355																						6.4	3.7	2.7
2017	6	B	III	3.6	3.1	1.2	38.7097																						6.3	3.6	2.7
2017	6	B	III	5.7	4.6	1.3	28.2609																						8.7	5.7	3
2017	6	B	III	4.7	3.9	1.5	38.4615																						8.4	4.7	3.7
2017	6	B	III	5.3	4.5	1.6	35.5556																						9.4	5.3	4.1
2017	6	B	III	4.4	3.8	1.7	44.7368																						6.7	4.4	2.3
2017	6	B	III	3.8	3.3	1.3	39.3939																						7	3.8	3.2
2017	6	B	III	3.8	3.3	1.3	39.3939																						6.9	3.8	3.1
2017	6	B	III	4.7	4	1.5	37.5																						8.2	4.7	3.5
2017	6	B	III	4.6	4	1.5	37.5																						8.2	4.6	3.6
2017	6	B	III	3.7	3.1	1.3	41.9355																						6.4	3.7	2.7
2017	6	B	III	3.6	3.1	1.2	38.7097																						6.3	3.6	2.7
2017	6	B	III	5.7	4.6	1.3	28.2609																						8.7	5.7	3
2017	6	B	III	4.7	3.9	1.5	38.4615																						8.4	4.7	3.7
2017	6	B	III	5.3	4.5	1.6	35.5556																						9.4	5.3	4.1
2017	6	B	III	4.4	3.8	1.7	44.7368																						6.7	4.4	2.3
2017	6	B	III	3.8	3.3	1.3	39.3939																						7	3.8	3.2
2017	6	B	III	3.8	3.3	1.3	39.3939																						6.9	3.8	3.1
2017	6	B	III	4.7	4	1.5	37.5																						8.2	4.7	3.5
2017	6	B	III	4.6	4	1.5	37.5																						8.2	4.6	3.6
2017	6	B	III	3.7	3.1	1.3	41.9355																						6.4	3.7	2.7
2017	6	B	III	3.6	3.1	1.2	38.7097																						6.3	3.6	2.7
2017	6	B	III	5.7	4.6	1.3	28.2609																						8.7	5.7	3
2017	6	B	III	4.7	3.9	1.5	38.4615																						8.4	4.7	3.7
2017	6	B	III	5.3	4.5	1.6	35.5556																						9.4	5.3	4.1
2017	6	B	III	4.4	3.8	1.7	44.7368																						6.7	4.4	2.3
2017	6	C	I	4.5	3.8	1.7	44.7368																						5.6	4.5	1.1
2017	6	C	I	4.3	3.4	1.3	38.2353																						5.6	4.3	1.3
2017	6	C	I	5.3	4.2	1.6	38.0952																						7	5.3	1.7
2017	6	C	I	3.6	3.1	1.3	41.9355																						4.5	3.6	0.9
2017	6	C	I	3.9	3.4	1.4	41.1765																						5	3.9	1.1
2017	6	C	I	3.9	3.4	1.3	38.2353																						5	3.9	1.1
2017	6	C	I	3.1	2.8	1.1	39.2857																						4.2	3.1	1.1
2017	6	C	I	3	2.7	1.1	40.7407																						4.2	3	1.2
2017	6	C	I	3	2.5	1.1	44																						3.8	3	0.8
2017	6	C	I	2.9	2.5	1	40																						3.8	2.9	0.9
2017	6	C	I	4.5	3.8	1.7	44.7368																						5.6	4.5	1.1
2017	6	C	I	4.3	3.4	1.3	38.2353																						5.6	4.3	1.3
2017	6	C	I	5.3	4.2	1.6	38.0952																						7	5.3	1.7
2017	6	C	I	3.6	3.1	1.3	41.9355																						4.5	3.6	0.9
2017	6	C	I	3.9	3.4	1.4	41.1765																						5	3.9	1.1
2017	6	C	I	3.9	3.4	1.3	38.2353																						5	3.9	1.1
2017	6	C	I	3.1	2.8	1.1	39.2857																						4.2	3.1	1.1
2017	6	C	I	3	2.7	1.1	40.7407																						4.2	3	1.2
2017	6	C	I	3	2.5	1.1	44																						3.8	3	0.8
2017	6	C	I	2.9	2.5	1	40																						3.8	2.9	0.9
2017	6	C	I	4.5	3.8	1.7	44.7368																						5.6	4.5	1.1
2017	6	C	I	4.3	3.4	1.3	38.2353																						5.6	4.3	1.3
2017	6	C	I	5.3	4.2	1.6	38.0952																						7	5.3	1.7
2017	6	C	I	3.6	3.1	1.3	41.9355																						4.5	3.6	0.9
2017	6	C	I	3.9	3.4	1.4	41.1765																						5	3.9	1.1
2017	6	C	I	3.9	3.4	1.3	38.2353																						5	3.9	1.1
2017	6	C	I	3.1	2.8	1.1	39.2857																						4.2	3.1	1.1
2017	6	C	I	3	2.7	1.1	40.7407																						4.2	3	1.2
2017	6	C	I	3	2.5	1.1	44																						3.8	3	0.8
2017	6	C	I	2.9	2.5	1	40																						3.8	2.9	0.9
2017	6	C	I	4.5	3.8	1.7	44.7368																						5.6	4.5	1.1
2017	6	C	I	4.3	3.4	1.3	38.2353																						5.6	4.3	1.3
2017	6	C	I	5.3	4.2	1.6	38.0952																						7	5.3	1.7
2017	6	C	I	3.6	3.1	1.3	41.9355																						4.5	3.6	0.9
2017	6	C	I	3.9	3.4	1.4	41.1765																						5	3.9	1.1
2017	6	C	I	3.9	3.4	1.3	38.2353																						5	3.9	1.1
2017	6	C	I	3.1	2.8	1.1	39.2857																						4.2	3.1	1.1
2017	6	C	I	3	2.7	1.1	40.7407																						4.2	3	1.2
2017	6	C	I	3	2.5	1.1	44																						3.8	3	0.8
2017	6	C	I	2.9	2.5	1	40																						3.8	2.9	0.9
2017	6	C	II	5.1	4.4	2	45.4545																						7.5	5.1	2.4
2017	6	C	II	5.1	4.4	2	45.4545																						7.5	5.1	2.4
2017	6	C	II	4.6	3.9	1.3	33.3333																						7.7	4.6	3.1
2017	6	C	II	5.9	4.9	2	40.8163																						9.2	5.9	3.3
2017	6	C	II	4.5	4	1.9	47.5																						6.9	4.5	2.4
2017	6	C	II	4.6	3.7	1	27.027																						7.4	4.6	2.8
2017	6	C	II	4.5	3.7	1.5	40.5405																						7	4.5	2.5
2017	6	C	II	4.5	3.6	1.4	38.8889																						7	4.5	2.5
2017	6	C	II	4.1	3.6	1.7	47.2222																						6.4	4.1	2.3
2017	6	C	II	4	3.6	1.7	47.2222																						6.3	4	2.3
2017	6	C	II	5.1	4.4	2	45.4545																						7.5	5.1	2.4
2017	6	C	II	5.1	4.4	2	45.4545																						7.5	5.1	2.4
2017	6	C	II	4.6	3.9	1.3	33.3333																						7.7	4.6	3.1
2017	6	C	II	5.9	4.9	2	40.8163																						9.2	5.9	3.3
2017	6	C	II	4.5	4	1.9	47.5																						6.9	4.5	2.4
2017	6	C	II	4.6	3.7	1	27.027																						7.4	4.6	2.8
2017	6	C	II	4.5	3.7	1.5	40.5405																						7	4.5	2.5
2017	6	C	II	4.5	3.6	1.4	38.8889																						7	4.5	2.5
2017	6	C	II	4.1	3.6	1.7	47.2222																						6.4	4.1	2.3
2017	6	C	II	4	3.6	1.7	47.2222																						6.3	4	2.3
2017	6	C	II	5.1	4.4	2	45.4545																						7.5	5.1	2.4
2017	6	C	II	5.1	4.4	2	45.4545																						7.5	5.1	2.4
2017	6	C	II	4.6	3.9	1.3	33.3333																						7.7	4.6	3.1
2017	6	C	II	5.9	4.9	2	40.8163																						9.2	5.9	3.3
2017	6	C	II	4.5	4	1.9	47.5																						6.9	4.5	2.4
2017	6	C	II	4.6	3.7	1	27.027																						7.4	4.6	2.8
2017	6	C	II	4.5	3.7	1.5	40.5405																						7	4.5	2.5
2017	6	C	II	4.5	3.6	1.4	38.8889																						7	4.5	2.5
2017	6	C	II	4.1	3.6	1.7	47.2222																						6.4	4.1	2.3
2017	6	C	II	4	3.6	1.7	47.2222																						6.3	4	2.3
2017	6	C	II	5.1	4.4	2	45.4545																						7.5	5.1	2.4
2017	6	C	II	5.1	4.4	2	45.4545																						7.5	5.1	2.4
2017	6	C	II	4.6	3.9	1.3	33.3333																						7.7	4.6	3.1
2017	6	C	II	5.9	4.9	2	40.8163																						9.2	5.9	3.3
2017	6	C	II	4.5	4	1.9	47.5																						6.9	4.5	2.4
2017	6	C	II	4.6	3.7	1	27.027																						7.4	4.6	2.8
2017	6	C	II	4.5	3.7	1.5	40.5405																						7	4.5	2.5
2017	6	C	II	4.5	3.6	1.4	38.8889																						7	4.5	2.5
2017	6	C	II	4.1	3.6	1.7	47.2222																						6.4	4.1	2.3
2017	6	C	II	4	3.6	1.7	47.2222																						6.3	4	2.3
2017	6	C	III	5.1	4.6	1.9	41.3043																						9.8	5.1	4.7
2017	6	C	III	5.8	4.9	1.9	38.7755																						10	5.8	4.2
2017	6	C	III	4.3	3.6	1.7	47.2222																						7.9	4.3	3.6
2017	6	C	III	5.4	4.4	1.9	43.1818																						8.6	5.4	3.2
2017	6	C	III	4.7	4	1.6	40																						8.1	4.7	3.4
2017	6	C	III	4.7	3.9	1.5	38.4615																						8	4.7	3.3
2017	6	C	III	4.2	3.7	1.5	40.5405																						7.1	4.2	2.9
2017	6	C	III	4.2	3.7	1.5	40.5405																						7.1	4.2	2.9
2017	6	C	III	5.2	4.4	1.8	40.9091																						8.7	5.2	3.5
2017	6	C	III	5.2	4.3	1.7	39.5349																						8.7	5.2	3.5
2017	6	C	III	5.1	4.6	1.9	41.3043																						9.8	5.1	4.7
2017	6	C	III	5.8	4.9	1.9	38.7755																						10	5.8	4.2
2017	6	C	III	4.3	3.6	1.7	47.2222																						7.9	4.3	3.6
2017	6	C	III	5.4	4.4	1.9	43.1818																						8.6	5.4	3.2
2017	6	C	III	4.7	4	1.6	40																						8.1	4.7	3.4
2017	6	C	III	4.7	3.9	1.5	38.4615																						8	4.7	3.3
2017	6	C	III	4.2	3.7	1.5	40.5405																						7.1	4.2	2.9
2017	6	C	III	4.2	3.7	1.5	40.5405																						7.1	4.2	2.9
2017	6	C	III	5.2	4.4	1.8	40.9091																						8.7	5.2	3.5
2017	6	C	III	5.2	4.3	1.7	39.5349																						8.7	5.2	3.5
2017	6	C	III	5.1	4.6	1.9	41.3043																						9.8	5.1	4.7
2017	6	C	III	5.8	4.9	1.9	38.7755																						10	5.8	4.2
2017	6	C	III	4.3	3.6	1.7	47.2222																						7.9	4.3	3.6
2017	6	C	III	5.4	4.4	1.9	43.1818																						8.6	5.4	3.2
2017	6	C	III	4.7	4	1.6	40																						8.1	4.7	3.4
2017	6	C	III	4.7	3.9	1.5	38.4615																						8	4.7	3.3
2017	6	C	III	4.2	3.7	1.5	40.5405																						7.1	4.2	2.9
2017	6	C	III	4.2	3.7	1.5	40.5405																						7.1	4.2	2.9
2017	6	C	III	5.2	4.4	1.8	40.9091																						8.7	5.2	3.5
2017	6	C	III	5.2	4.3	1.7	39.5349																						8.7	5.2	3.5
2017	6	C	III	5.1	4.6	1.9	41.3043																						9.8	5.1	4.7
2017	6	C	III	5.8	4.9	1.9	38.7755																						10	5.8	4.2
2017	6	C	III	4.3	3.6	1.7	47.2222																						7.9	4.3	3.6
2017	6	C	III	5.4	4.4	1.9	43.1818																						8.6	5.4	3.2
2017	6	C	III	4.7	4	1.6	40																						8.1	4.7	3.4
2017	6	C	III	4.7	3.9	1.5	38.4615																						8	4.7	3.3
2017	6	C	III	4.2	3.7	1.5	40.5405																						7.1	4.2	2.9
2017	6	C	III	4.2	3.7	1.5	40.5405																						7.1	4.2	2.9
2017	6	C	III	5.2	4.4	1.8	40.9091																						8.7	5.2	3.5
2017	6	C	III	5.2	4.3	1.7	39.5349																						8.7	5.2	3.5
2018	1	A		6.6	4.5	2.2	48.8889
2018	1	A		7	5.1	2.6	50.9804
2018	1	A		5.4	3.7	0.9	24.3243
2018	1	A		5.8	4.2	1.8	42.8571
2018	1	A		6.4	4.1	1.4	34.1463
2018	1	A		6.5	4.6	2.1	45.6522
2018	1	A		9.5	6.3	2.8	44.4444
2018	1	A		7.2	5.4	2.5	46.2963
2018	1	A		5.5	3.7	1.4	37.8378
2018	1	A		4.5	3.1	0.7	22.5806
2018	1	A		6.6	4.5	2.2	48.8889
2018	1	A		7	5.1	2.6	50.9804
2018	1	A		5.4	3.7	0.9	24.3243
2018	1	A		5.8	4.2	1.8	42.8571
2018	1	A		6.4	4.1	1.4	34.1463
2018	1	A		6.5	4.6	2.1	45.6522
2018	1	A		9.5	6.3	2.8	44.4444
2018	1	A		7.2	5.4	2.5	46.2963
2018	1	A		5.5	3.7	1.4	37.8378
2018	1	A		4.5	3.1	0.7	22.5806
2018	1	A		6.6	4.5	2.2	48.8889
2018	1	A		7	5.1	2.6	50.9804
2018	1	A		5.4	3.7	0.9	24.3243
2018	1	A		5.8	4.2	1.8	42.8571
2018	1	A		6.4	4.1	1.4	34.1463
2018	1	A		6.5	4.6	2.1	45.6522
2018	1	A		9.5	6.3	2.8	44.4444
2018	1	A		7.2	5.4	2.5	46.2963
2018	1	A		5.5	3.7	1.4	37.8378
2018	1	A		4.5	3.1	0.7	22.5806
2018	1	A		6.6	4.5	2.2	48.8889
2018	1	A		7	5.1	2.6	50.9804
2018	1	A		5.4	3.7	0.9	24.3243
2018	1	A		5.8	4.2	1.8	42.8571
2018	1	A		6.4	4.1	1.4	34.1463
2018	1	A		6.5	4.6	2.1	45.6522
2018	1	A		9.5	6.3	2.8	44.4444
2018	1	A		7.2	5.4	2.5	46.2963
2018	1	A		5.5	3.7	1.4	37.8378
2018	1	A		4.5	3.1	0.7	22.5806
2018	1	B		6.7	4.9	2	40.8163
2018	1	B		5.8	4.3	2	46.5116
2018	1	B		5.7	4	1.5	37.5
2018	1	B		7.8	5.5	2.3	41.8182
2018	1	B		7.1	5.1	2.5	49.0196
2018	1	B		5.8	4.1	1.7	41.4634
2018	1	B		5.9	3.9	1.3	33.3333
2018	1	B		5.6	4	1.5	37.5
2018	1	B		8	5.6	2.6	46.4286
2018	1	B		6.5	4.7	2	42.5532
2018	1	B		6.7	4.9	2	40.8163
2018	1	B		5.8	4.3	2	46.5116
2018	1	B		5.7	4	1.5	37.5
2018	1	B		7.8	5.5	2.3	41.8182
2018	1	B		7.1	5.1	2.5	49.0196
2018	1	B		5.8	4.1	1.7	41.4634
2018	1	B		5.9	3.9	1.3	33.3333
2018	1	B		5.6	4	1.5	37.5
2018	1	B		8	5.6	2.6	46.4286
2018	1	B		6.5	4.7	2	42.5532
2018	1	B		6.7	4.9	2	40.8163
2018	1	B		5.8	4.3	2	46.5116
2018	1	B		5.7	4	1.5	37.5
2018	1	B		7.8	5.5	2.3	41.8182
2018	1	B		7.1	5.1	2.5	49.0196
2018	1	B		5.8	4.1	1.7	41.4634
2018	1	B		5.9	3.9	1.3	33.3333
2018	1	B		5.6	4	1.5	37.5
2018	1	B		8	5.6	2.6	46.4286
2018	1	B		6.5	4.7	2	42.5532
2018	1	B		6.7	4.9	2	40.8163
2018	1	B		5.8	4.3	2	46.5116
2018	1	B		5.7	4	1.5	37.5
2018	1	B		7.8	5.5	2.3	41.8182
2018	1	B		7.1	5.1	2.5	49.0196
2018	1	B		5.8	4.1	1.7	41.4634
2018	1	B		5.9	3.9	1.3	33.3333
2018	1	B		5.6	4	1.5	37.5
2018	1	B		8	5.6	2.6	46.4286
2018	1	B		6.5	4.7	2	42.5532
2018	1	C		4.9	3.5	1.3	37.1429
2018	1	C		6.1	4.2	1.6	38.0952
2018	1	C		6.6	4.8	2.1	43.75
2018	1	C		6.5	4.1	1.3	31.7073
2018	1	C		7.3	5.5	2.6	47.2727
2018	1	C		7.2	5.4	2.6	48.1481
2018	1	C		7.1	4.3	1.7	39.5349
2018	1	C		5.6	4.3	1.9	44.186
2018	1	C		5.6	4.2	2	47.619
2018	1	C		7.7	4.9	1.4	28.5714
2018	1	C		4.9	3.5	1.3	37.1429
2018	1	C		6.1	4.2	1.6	38.0952
2018	1	C		6.6	4.8	2.1	43.75
2018	1	C		6.5	4.1	1.3	31.7073
2018	1	C		7.3	5.5	2.6	47.2727
2018	1	C		7.2	5.4	2.6	48.1481
2018	1	C		7.1	4.3	1.7	39.5349
2018	1	C		5.6	4.3	1.9	44.186
2018	1	C		5.6	4.2	2	47.619
2018	1	C		7.7	4.9	1.4	28.5714
2018	1	C		4.9	3.5	1.3	37.1429
2018	1	C		6.1	4.2	1.6	38.0952
2018	1	C		6.6	4.8	2.1	43.75
2018	1	C		6.5	4.1	1.3	31.7073
2018	1	C		7.3	5.5	2.6	47.2727
2018	1	C		7.2	5.4	2.6	48.1481
2018	1	C		7.1	4.3	1.7	39.5349
2018	1	C		5.6	4.3	1.9	44.186
2018	1	C		5.6	4.2	2	47.619
2018	1	C		7.7	4.9	1.4	28.5714
2018	1	C		4.9	3.5	1.3	37.1429
2018	1	C		6.1	4.2	1.6	38.0952
2018	1	C		6.6	4.8	2.1	43.75
2018	1	C		6.5	4.1	1.3	31.7073
2018	1	C		7.3	5.5	2.6	47.2727
2018	1	C		7.2	5.4	2.6	48.1481
2018	1	C		7.1	4.3	1.7	39.5349
2018	1	C		5.6	4.3	1.9	44.186
2018	1	C		5.6	4.2	2	47.619																						strara masy
2018	1	C		7.7	4.9	1.4	28.5714																						przed	po	strata
2018	2	A		4.1	3.6	1.7	47.2222																						6.5	4.1	2.4
2018	2	A		4.2	3.5	1.3	37.1429																						6.8	4.2	2.6
2018	2	A		4.4	3.4	1.7	50																						6.4	4.4	2
2018	2	A		4.3	4.1	2	48.7805																						6.3	4.3	2
2018	2	A		3.1	2.6	1	38.4615																						4.8	3.1	1.7
2018	2	A		3	2.7	0.9	33.3333																						4.8	3	1.8
2018	2	A		5.1	4.3	1.9	44.186																						7.4	5.1	2.3
2018	2	A		5.1	4.1	1.8	43.9024																						7.3	5.1	2.2
2018	2	A		3.8	3.4	1.4	41.1765																						5.5	3.8	1.7
2018	2	A		3.7	3	1	33.3333																						5.5	3.7	1.8
2018	2	A		4.1	3.6	1.7	47.2222																						6.5	4.1	2.4
2018	2	A		4.2	3.5	1.3	37.1429																						6.8	4.2	2.6
2018	2	A		4.4	3.4	1.7	50																						6.4	4.4	2
2018	2	A		4.3	4.1	2	48.7805																						6.3	4.3	2
2018	2	A		3.1	2.6	1	38.4615																						4.8	3.1	1.7
2018	2	A		3	2.7	0.9	33.3333																						4.8	3	1.8
2018	2	A		5.1	4.3	1.9	44.186																						7.4	5.1	2.3
2018	2	A		5.1	4.1	1.8	43.9024																						7.3	5.1	2.2
2018	2	A		3.8	3.4	1.4	41.1765																						5.5	3.8	1.7
2018	2	A		3.7	3	1	33.3333																						5.5	3.7	1.8
2018	2	A		4.1	3.6	1.7	47.2222																						6.5	4.1	2.4
2018	2	A		4.2	3.5	1.3	37.1429																						6.8	4.2	2.6
2018	2	A		4.4	3.4	1.7	50																						6.4	4.4	2
2018	2	A		4.3	4.1	2	48.7805																						6.3	4.3	2
2018	2	A		3.1	2.6	1	38.4615																						4.8	3.1	1.7
2018	2	A		3	2.7	0.9	33.3333																						4.8	3	1.8
2018	2	A		5.1	4.3	1.9	44.186																						7.4	5.1	2.3
2018	2	A		5.1	4.1	1.8	43.9024																						7.3	5.1	2.2
2018	2	A		3.8	3.4	1.4	41.1765																						5.5	3.8	1.7
2018	2	A		3.7	3	1	33.3333																						5.5	3.7	1.8
2018	2	A		4.1	3.6	1.7	47.2222																						6.5	4.1	2.4
2018	2	A		4.2	3.5	1.3	37.1429																						6.8	4.2	2.6
2018	2	A		4.4	3.4	1.7	50																						6.4	4.4	2
2018	2	A		4.3	4.1	2	48.7805																						6.3	4.3	2
2018	2	A		3.1	2.6	1	38.4615																						4.8	3.1	1.7
2018	2	A		3	2.7	0.9	33.3333																						4.8	3	1.8
2018	2	A		5.1	4.3	1.9	44.186																						7.4	5.1	2.3
2018	2	A		5.1	4.1	1.8	43.9024																						7.3	5.1	2.2
2018	2	A		3.8	3.4	1.4	41.1765																						5.5	3.8	1.7
2018	2	A		3.7	3	1	33.3333																						5.5	3.7	1.8
2018	2	B		3.6	3.4	1.5	44.1176																						5.4	3.6	1.8
2018	2	B		3.5	2.6	0.8	30.7692																						5.3	3.5	1.8
2018	2	B		3.2	2.9	1.2	41.3793																						6.2	3.2	3
2018	2	B		3.1	2.8	1.1	39.2857																						6.1	3.1	3
2018	2	B		4.1	3.9	1.5	38.4615																						5.9	4.1	1.8
2018	2	B		4	3.2	0.9	28.125																						5.9	4	1.9
2018	2	B		4.7	4.3	1.9	44.186																						6.8	4.7	2.1
2018	2	B		4.6	3.8	1.5	39.4737																						6.8	4.6	2.2
2018	2	B		4.4	3.8	1.4	36.8421																						6.9	4.4	2.5
2018	2	B		4.8	4.3	1.8	41.8605																						7.3	4.8	2.5
2018	2	B		3.6	3.4	1.5	44.1176																						5.4	3.6	1.8
2018	2	B		3.5	2.6	0.8	30.7692																						5.3	3.5	1.8
2018	2	B		3.2	2.9	1.2	41.3793																						6.2	3.2	3
2018	2	B		3.1	2.8	1.1	39.2857																						6.1	3.1	3
2018	2	B		4.1	3.9	1.5	38.4615																						5.9	4.1	1.8
2018	2	B		4	3.2	0.9	28.125																						5.9	4	1.9
2018	2	B		4.7	4.3	1.9	44.186																						6.8	4.7	2.1
2018	2	B		4.6	3.8	1.5	39.4737																						6.8	4.6	2.2
2018	2	B		4.4	3.8	1.4	36.8421																						6.9	4.4	2.5
2018	2	B		4.8	4.3	1.8	41.8605																						7.3	4.8	2.5
2018	2	B		3.6	3.4	1.5	44.1176																						5.4	3.6	1.8
2018	2	B		3.5	2.6	0.8	30.7692																						5.3	3.5	1.8
2018	2	B		3.2	2.9	1.2	41.3793																						6.2	3.2	3
2018	2	B		3.1	2.8	1.1	39.2857																						6.1	3.1	3
2018	2	B		4.1	3.9	1.5	38.4615																						5.9	4.1	1.8
2018	2	B		4	3.2	0.9	28.125																						5.9	4	1.9
2018	2	B		4.7	4.3	1.9	44.186																						6.8	4.7	2.1
2018	2	B		4.6	3.8	1.5	39.4737																						6.8	4.6	2.2
2018	2	B		4.4	3.8	1.4	36.8421																						6.9	4.4	2.5
2018	2	B		4.8	4.3	1.8	41.8605																						7.3	4.8	2.5
2018	2	B		3.6	3.4	1.5	44.1176																						5.4	3.6	1.8
2018	2	B		3.5	2.6	0.8	30.7692																						5.3	3.5	1.8
2018	2	B		3.2	2.9	1.2	41.3793																						6.2	3.2	3
2018	2	B		3.1	2.8	1.1	39.2857																						6.1	3.1	3
2018	2	B		4.1	3.9	1.5	38.4615																						5.9	4.1	1.8
2018	2	B		4	3.2	0.9	28.125																						5.9	4	1.9
2018	2	B		4.7	4.3	1.9	44.186																						6.8	4.7	2.1
2018	2	B		4.6	3.8	1.5	39.4737																						6.8	4.6	2.2
2018	2	B		4.4	3.8	1.4	36.8421																						6.9	4.4	2.5
2018	2	B		4.8	4.3	1.8	41.8605																						7.3	4.8	2.5
2018	2	C		5	4.5	2.1	46.6667																						6.7	5	1.7
2018	2	C		5	4.2	2	47.619																						6.7	5	1.7
2018	2	C		4.6	3.7	1.5	40.5405																						6.1	4.6	1.5
2018	2	C		4.6	4	1.8	45																						6.1	4.6	1.5
2018	2	C		5.2	4.1	1.7	41.4634																						6.3	5.2	1.1
2018	2	C		4.4	3.4	1.1	32.3529																						6.3	4.4	1.9
2018	2	C		3.5	2.8	1.2	42.8571																						4.5	3.5	1
2018	2	C		3.4	2.9	0.9	31.0345																						4.4	3.4	1
2018	2	C		3.4	3.6	1	27.7778																						6.2	3.4	2.8
2018	2	C		3.8	3.2	1.4	43.75																						5.2	3.8	1.4
2018	2	C		5	4.5	2.1	46.6667																						6.7	5	1.7
2018	2	C		5	4.2	2	47.619																						6.7	5	1.7
2018	2	C		4.6	3.7	1.5	40.5405																						6.1	4.6	1.5
2018	2	C		4.6	4	1.8	45																						6.1	4.6	1.5
2018	2	C		5.2	4.1	1.7	41.4634																						6.3	5.2	1.1
2018	2	C		4.4	3.4	1.1	32.3529																						6.3	4.4	1.9
2018	2	C		3.5	2.8	1.2	42.8571																						4.5	3.5	1
2018	2	C		3.4	2.9	0.9	31.0345																						4.4	3.4	1
2018	2	C		3.4	3.6	1	27.7778																						6.2	3.4	2.8
2018	2	C		3.8	3.2	1.4	43.75																						5.2	3.8	1.4
2018	2	C		5	4.5	2.1	46.6667																						6.7	5	1.7
2018	2	C		5	4.2	2	47.619																						6.7	5	1.7
2018	2	C		4.6	3.7	1.5	40.5405																						6.1	4.6	1.5
2018	2	C		4.6	4	1.8	45																						6.1	4.6	1.5
2018	2	C		5.2	4.1	1.7	41.4634																						6.3	5.2	1.1
2018	2	C		4.4	3.4	1.1	32.3529																						6.3	4.4	1.9
2018	2	C		3.5	2.8	1.2	42.8571																						4.5	3.5	1
2018	2	C		3.4	2.9	0.9	31.0345																						4.4	3.4	1
2018	2	C		3.4	3.6	1	27.7778																						6.2	3.4	2.8
2018	2	C		3.8	3.2	1.4	43.75																						5.2	3.8	1.4
2018	2	C		5	4.5	2.1	46.6667																						6.7	5	1.7
2018	2	C		5	4.2	2	47.619																						6.7	5	1.7
2018	2	C		4.6	3.7	1.5	40.5405																						6.1	4.6	1.5
2018	2	C		4.6	4	1.8	45																						6.1	4.6	1.5
2018	2	C		5.2	4.1	1.7	41.4634																						6.3	5.2	1.1
2018	2	C		4.4	3.4	1.1	32.3529																						6.3	4.4	1.9
2018	2	C		3.5	2.8	1.2	42.8571																						4.5	3.5	1
2018	2	C		3.4	2.9	0.9	31.0345																						4.4	3.4	1
2018	2	C		3.4	3.6	1	27.7778																						6.2	3.4	2.8
2018	2	C		3.8	3.2	1.4	43.75																						5.2	3.8	1.4
2018	3	A	I	7.4	5.2	2.4	46.1538																						7.7	7.4	0.3
2018	3	A	I	6.7	4.7	2.2	46.8085																						7.1	6.7	0.4
2018	3	A	I	5.5	3.9	1.3	33.3333																						5.6	5.5	0.1
2018	3	A	I	5.5	3.8	1.3	34.2105																						5.6	5.5	0.1
2018	3	A	I	7.6	5.1	2.4	47.0588																						7.9	7.6	0.3
2018	3	A	I	7.5	4.8	2.2	45.8333																						7.8	7.5	0.3
2018	3	A	I	8.8	6	2.6	43.3333																						9.1	8.8	0.3
2018	3	A	I	8.7	5.6	2.6	46.4286																						9	8.7	0.3
2018	3	A	I	5.2	3.5	1.5	42.8571																						5.3	5.2	0.1
2018	3	A	I	5.1	3.7	1.7	45.9459																						5.3	5.1	0.2
2018	3	A	I	7.4	5.2	2.4	46.1538																						7.7	7.4	0.3
2018	3	A	I	6.7	4.7	2.2	46.8085																						7.1	6.7	0.4
2018	3	A	I	5.5	3.9	1.3	33.3333																						5.6	5.5	0.1
2018	3	A	I	5.5	3.8	1.3	34.2105																						5.6	5.5	0.1
2018	3	A	I	7.6	5.1	2.4	47.0588																						7.9	7.6	0.3
2018	3	A	I	7.5	4.8	2.2	45.8333																						7.8	7.5	0.3
2018	3	A	I	8.8	6	2.6	43.3333																						9.1	8.8	0.3
2018	3	A	I	8.7	5.6	2.6	46.4286																						9	8.7	0.3
2018	3	A	I	5.2	3.5	1.5	42.8571																						5.3	5.2	0.1
2018	3	A	I	5.1	3.7	1.7	45.9459																						5.3	5.1	0.2
2018	3	A	I	7.4	5.2	2.4	46.1538																						7.7	7.4	0.3
2018	3	A	I	6.7	4.7	2.2	46.8085																						7.1	6.7	0.4
2018	3	A	I	5.5	3.9	1.3	33.3333																						5.6	5.5	0.1
2018	3	A	I	5.5	3.8	1.3	34.2105																						5.6	5.5	0.1
2018	3	A	I	7.6	5.1	2.4	47.0588																						7.9	7.6	0.3
2018	3	A	I	7.5	4.8	2.2	45.8333																						7.8	7.5	0.3
2018	3	A	I	8.8	6	2.6	43.3333																						9.1	8.8	0.3
2018	3	A	I	8.7	5.6	2.6	46.4286																						9	8.7	0.3
2018	3	A	I	5.2	3.5	1.5	42.8571																						5.3	5.2	0.1
2018	3	A	I	5.1	3.7	1.7	45.9459																						5.3	5.1	0.2
2018	3	A	I	7.4	5.2	2.4	46.1538																						7.7	7.4	0.3
2018	3	A	I	6.7	4.7	2.2	46.8085																						7.1	6.7	0.4
2018	3	A	I	5.5	3.9	1.3	33.3333																						5.6	5.5	0.1
2018	3	A	I	5.5	3.8	1.3	34.2105																						5.6	5.5	0.1
2018	3	A	I	7.6	5.1	2.4	47.0588																						7.9	7.6	0.3
2018	3	A	I	7.5	4.8	2.2	45.8333																						7.8	7.5	0.3
2018	3	A	I	8.8	6	2.6	43.3333																						9.1	8.8	0.3
2018	3	A	I	8.7	5.6	2.6	46.4286																						9	8.7	0.3
2018	3	A	I	5.2	3.5	1.5	42.8571																						5.3	5.2	0.1
2018	3	A	I	5.1	3.7	1.7	45.9459																						5.3	5.1	0.2
2018	3	A	II	7.9	5.6	2.6	46.4286																						8.3	7.9	0.4
2018	3	A	II	4.7	3.6	1.5	41.6667																						4.9	4.7	0.2
2018	3	A	II	5.2	3.3	1.1	33.3333																						5.3	5.2	0.1
2018	3	A	II	5.1	3.3	1.1	33.3333																						5.3	5.1	0.2
2018	3	A	II	5.6	3.9	1.6	41.0256																						5.6	5.6	0
2018	3	A	II	5.5	3.6	1.4	38.8889																						5.5	5.5	0
2018	3	A	II	6.5	4.2	1.5	35.7143																						6.7	6.5	0.2
2018	3	A	II	6.4	4.7	2	42.5532																						6.7	6.4	0.3
2018	3	A	II	5.4	3.9	2	51.2821																						5.6	5.4	0.2
2018	3	A	II	5.4	3.8	1.9	50																						5.6	5.4	0.2
2018	3	A	II	7.9	5.6	2.6	46.4286																						8.3	7.9	0.4
2018	3	A	II	4.7	3.6	1.5	41.6667																						4.9	4.7	0.2
2018	3	A	II	5.2	3.3	1.1	33.3333																						5.3	5.2	0.1
2018	3	A	II	5.1	3.3	1.1	33.3333																						5.3	5.1	0.2
2018	3	A	II	5.6	3.9	1.6	41.0256																						5.6	5.6	0
2018	3	A	II	5.5	3.6	1.4	38.8889																						5.5	5.5	0
2018	3	A	II	6.5	4.2	1.5	35.7143																						6.7	6.5	0.2
2018	3	A	II	6.4	4.7	2	42.5532																						6.7	6.4	0.3
2018	3	A	II	5.4	3.9	2	51.2821																						5.6	5.4	0.2
2018	3	A	II	5.4	3.8	1.9	50																						5.6	5.4	0.2
2018	3	A	II	7.9	5.6	2.6	46.4286																						8.3	7.9	0.4
2018	3	A	II	4.7	3.6	1.5	41.6667																						4.9	4.7	0.2
2018	3	A	II	5.2	3.3	1.1	33.3333																						5.3	5.2	0.1
2018	3	A	II	5.1	3.3	1.1	33.3333																						5.3	5.1	0.2
2018	3	A	II	5.6	3.9	1.6	41.0256																						5.6	5.6	0
2018	3	A	II	5.5	3.6	1.4	38.8889																						5.5	5.5	0
2018	3	A	II	6.5	4.2	1.5	35.7143																						6.7	6.5	0.2
2018	3	A	II	6.4	4.7	2	42.5532																						6.7	6.4	0.3
2018	3	A	II	5.4	3.9	2	51.2821																						5.6	5.4	0.2
2018	3	A	II	5.4	3.8	1.9	50																						5.6	5.4	0.2
2018	3	A	II	7.9	5.6	2.6	46.4286																						8.3	7.9	0.4
2018	3	A	II	4.7	3.6	1.5	41.6667																						4.9	4.7	0.2
2018	3	A	II	5.2	3.3	1.1	33.3333																						5.3	5.2	0.1
2018	3	A	II	5.1	3.3	1.1	33.3333																						5.3	5.1	0.2
2018	3	A	II	5.6	3.9	1.6	41.0256																						5.6	5.6	0
2018	3	A	II	5.5	3.6	1.4	38.8889																						5.5	5.5	0
2018	3	A	II	6.5	4.2	1.5	35.7143																						6.7	6.5	0.2
2018	3	A	II	6.4	4.7	2	42.5532																						6.7	6.4	0.3
2018	3	A	II	5.4	3.9	2	51.2821																						5.6	5.4	0.2
[truncated: 1,922 more rows]

## Sheet: dry matter,diseases 
										means
year	period of storage	Combinations of protect	condition of storage	dry matter	Moisture content of kernel (%)		percentage of hazelnuts in the husk	percentage of hazelnuts without husk		percentage of hazelnuts in the husk	percentage of hazelnuts without husk			affected by diseases	no affected by diseases			Explanation
2017	1	A		53.2573	46.7427		100	0										period of storage
2017	1	A		50.7278	49.2722		100	0										1 - after harvesting
2017	1	A		51.66	48.34		100	0		100	0							2 - after harvesting + stored for 7 days at room temperature
2017	1	B		47.9975	52.0025		100	0										3 - 2nd month after stored
2017	1	B		49.9912	50.0088		100	0										4 - 2nd month after stored + stored for 7 days at room temperature
2017	1	B		48.55	51.45		100	0		100	0							5 - 3rd month after stored
2017	1	C		52.165	47.835		100	0										6 - 3rd month after stored + stored for 7 days at room temperature
2017	1	C		49.5094	50.4906		100	0
2017	1	C		51.6	48.4		100	0		100	0							Combinations of protect
2017	2	A		64.0377	35.9623		25	75										A - control
2017	2	A		64.9094	35.0906		32	68										B -Probiotics
2017	2	A		64.59	35.41		18	82		25	75							C - Polyversum
2017	2	B		65.696	34.304		30	70
2017	2	B		65.5223	34.4777		20	80
2017	2	B		66.05	33.95		40	60		30	70							condition of storage
2017	2	C		57.8347	42.1653		60	40										I - NA - control
2017	2	C		57.8275	42.1725		50	50										II - KA (3:3)
2017	2	C		58.56	41.44		45	55		51.6667	48.3333							III - Bag X-trend (storage normal)
2017	3	A	I	65.7603	34.2397		5	95						30	70
2017	3	A	I	70.0939	29.9061		15	85						25	75
2017	3	A	I	68.05	31.95		10	90		10	90			35	65
2017	3	A	II	51.4155	48.5845		100	0						0	100
2017	3	A	II	48.5184	51.4816		100	0						0	100
2017	3	A	II	49.58	50.42		100	0		100	0			0	100
2017	3	A	III	44.5771	55.4229		100	0						5	95
2017	3	A	III	48.6623	51.3377		100	0						3	97
2017	3	A	III	46.64	53.36		100	0		100	0	70	30	2	98
2017	3	B	I	59.8932	40.1068		10	90						25	75
2017	3	B	I	69.8994	30.1006		20	80						21	79
2017	3	B	I	65.02	34.98		15	85		15	85			26	74
2017	3	B	II	51.0389	48.9611		100	0						11	89
2017	3	B	II	54.6129	45.3871		100	0						8	92
2017	3	B	II	52.65	47.35		100	0		100	0			10	90
2017	3	B	III	54.0564	45.9436		100	0						21	79
2017	3	B	III	54.1447	45.8553		100	0						15	85
2017	3	B	III	55.09	44.91		100	0		100	0	71.6667	28.3333	26	74
2017	3	C	I	53.8338	46.1662		10	90						20	80
2017	3	C	I	57.5312	42.4688		25	75						15	85
2017	3	C	I	55.69	44.31		18	82		17.6667	82.3333			20	80
2017	3	C	II	49.6506	50.3494		100	0						5	95
2017	3	C	II	50.6975	49.3025		100	0						4	96
2017	3	C	II	50.02	49.98		100	0		100	0			3	97
2017	3	C	III	53.6683	46.3317		100	0						0	100
2017	3	C	III	54.4177	45.5823		100	0						0	100
2017	3	C	III	54.15	45.85		100	0		100	0	72.5556	27.4444	0	100
2017	4	A	I	84.5689	15.4311		10	90
2017	4	A	I	86.0753	13.9247		7	93
2017	4	A	I	85.54	14.46		4	96		7	93
2017	4	A	II	84.6196	15.3804		10	90
2017	4	A	II	82.2399	17.7601		15	85
2017	4	A	II	83.58	16.42		5	95		10	90
2017	4	A	III	79.2825	20.7175		0	100
2017	4	A	III	80.3405	19.6595		0	100
2017	4	A	III	79.15	20.85		0	100		0	100	5.66667	94.3333
2017	4	B	I	77.9764	22.0236		5	95
2017	4	B	I	81.2619	18.7381		10	90
2017	4	B	I	81.55	18.45		3	97		6	94
2017	4	B	II	74.4955	25.5045		10	90
2017	4	B	II	79.5002	20.4998		5	95
2017	4	B	II	76.95	23.05		4	96		6.33333	93.6667
2017	4	B	III	85.0162	14.9838		12	88
2017	4	B	III	87.1612	12.8388		15	85
2017	4	B	III	83.22	16.78		10	90		12.3333	87.6667	8.22222	91.7778
2017	4	C	I	79.3135	20.6865		10	90
2017	4	C	I	85.29	14.71		4	96
2017	4	C	I	83.54	16.46		4	96		6	94
2017	4	C	II	78.4884	21.5116		12	88
2017	4	C	II	75.4669	24.5331		5	95
2017	4	C	II	76.69	23.31		1	99		6	94
2017	4	C	III	89.0028	10.9972		0	100
2017	4	C	III	88.561	11.439		0	100
2017	4	C	III	87.01	12.99		0	100		0	100	4	96
2017	5	A	I	63.6012	36.3988		15	85						65	35
2017	5	A	I	65.7991	34.2009		25	75						70	30
2017	5	A	I	64.85	35.15		20	80		20	80			67	33
2017	5	A	II	48.2654	51.7346		100	0						30	70
2017	5	A	II	51.1617	48.8383		100	0						20	80
2017	5	A	II	50.39	49.61		100	0		100	0			25	75
2017	5	A	III	58.971	41.029		100	0						60	40
2017	5	A	III	58.1745	41.8255		100	0						66	36
2017	5	A	III	57.69	42.31		100	0		100	0	73.3333	26.6667	62	38
2017	5	B	I	74.681	25.319		15	85						70	30
2017	5	B	I	64.0563	35.9437		12	87						50	50
2017	5	B	I	66.99	33.01		5	95		10.6667	89			90	10
2017	5	B	II	52.7917	47.2083		100	0						22	78
2017	5	B	II	53.336	46.664		100	0						45	55
2017	5	B	II	52.87	47.13		100	0		100	0			34	66
2017	5	B	III	47.9662	52.0338		100	0						81	19
2017	5	B	III	45.288	54.712		100	0						86	14
2017	5	B	III	46.87	53.13		100	0		100	0	70.2222	29.6667	83	17
2017	5	C	I	66.0107	33.9893		15	85						40	60
2017	5	C	I	69.9477	30.0523		10	90						65	35
2017	5	C	I	68.25	31.75		15	85		13.3333	86.6667			50	50
2017	5	C	II	53.4028	46.5972		100	0						71	29
2017	5	C	II	52.3147	47.6853		100	0						75	25
2017	5	C	II	52.12	47.88		100	0		100	0			70	30
2017	5	C	III	49.3589	50.6411		100	0						83	17
2017	5	C	III	44.8898	55.1102		100	0						78	22
2017	5	C	III	46.89	53.11		100	0		100	0	71.1111	28.8889	80	20
2017	6	A	I	92.8472	7.15276		0	100
2017	6	A	I	93.8882	6.11183		0	100
2017	6	A	I	91.55	8.45		0	100		0	100
2017	6	A	II	78.9465	21.0535		0	100
2017	6	A	II	73.5802	26.4198		0	100
2017	6	A	II	76.58	23.42		0	100		0	100
2017	6	A	III	83.6331	16.3669		2	98
2017	6	A	III	82.4569	17.5431		5	95
2017	6	A	III	81.69	18.31		1	99		2.66667	97.3333	0.888889	99.1111
2017	6	B	I	88.9776	11.0224		0	100
2017	6	B	I	86.2791	13.7209		0	100
2017	6	B	I	87.25	12.75		0	100		0	100
2017	6	B	II	77.8645	22.1355		0	100
2017	6	B	II	76.9611	23.0389		0	100
2017	6	B	II	77.25	22.75		0	100		0	100
2017	6	B	III	80.434	19.566		15	85
2017	6	B	III	80.1087	19.8913		10	90
2017	6	B	III	80.59	19.41		8	92		11	89	3.66667	96.3333
2017	6	C	I	88.8945	11.1055		0	100
2017	6	C	I	89.3277	10.6723		0	100
2017	6	C	I	89.22	10.78		0	100		0	100
2017	6	C	II	65.8925	34.1075		10	90
2017	6	C	II	68.6873	31.3127		5	95
2017	6	C	II	66.12	33.88		2	98		5.66667	94.3333
2017	6	C	III	78.0484	21.9516		0	100
2017	6	C	III	76.5984	23.4016		0	100
2017	6	C	III	77.05	22.95		0	100		0	100	1.88889	98.1111
2018	1	A		47.7707	52.2293		100	0
2018	1	A		51.085	48.915		100	0
2018	1	A		49.4279	50.5721		100	0
2018	1	B		51.3529	48.6471		100	0
2018	1	B		50.3474	49.6526		100	0
2018	1	B		50.8501	49.1499		100	0
2018	1	C		48.9968	51.0032		100	0
2018	1	C		50.082	49.918		100	0
2018	1	C		49.5394	50.4606		100	0
2018	2	A		54.479	45.521		40	60
2018	2	A		57.731	42.269		30	70
2018	2	A		56.105	43.895		35	65		35	65
2018	2	B		75.37	24.63		30	70
2018	2	B		66.0022	33.9978		20	80
2018	2	B		70.6861	29.3139		25	75		25	75
2018	2	C		53.7135	46.2865		80	20
2018	2	C		55.1477	44.8523		70	30
2018	2	C		54.4306	45.5694		75	25		75	25
2018	3	A	I	50.32	49.68		95	5
2018	3	A	I	52.9497	47.0503		93	7
2018	3	A	I	51.6348	48.3652		90	10		92.6667	7.33333
2018	3	A	II	50.7952	49.2048		100	0
2018	3	A	II	47.5167	52.4833		100	0
2018	3	A	II	49.156	50.844		100	0		100	0
2018	3	A	III	54.2928	45.7072		100	0
2018	3	A	III	51.4998	48.5002		100	0
2018	3	A	III	52.8963	47.1037		100	0		100	0
2018	3	B	I	57.1842	42.8158		90	10
2018	3	B	I	59.7384	40.2616		95	5
2018	3	B	I	58.4613	41.5387		92	8		92.3333	7.66667
2018	3	B	II	51.2115	48.7885		100	0
2018	3	B	II	48.852	51.148		100	0
2018	3	B	II	50.0317	49.9683		100	0		100	0
2018	3	B	III	50.6424	49.3576		100	0
2018	3	B	III	51.6829	48.3171		100	0
2018	3	B	III	51.1627	48.8373		100	0		100	0
2018	3	C	I	48.0644	51.9356		100	0
2018	3	C	I	48.6771	51.3229		98	2
2018	3	C	I	48.3707	51.6293		98	2		98.6667	1.33333
2018	3	C	II	45.4021	54.5979		100	0
2018	3	C	II	40.5389	59.4611		100	0
2018	3	C	II	42.9705	57.0295		100	0		100	0
2018	3	C	III	48.7938	51.2062		100	0
2018	3	C	III	50.4146	49.5854		100	0
2018	3	C	III	49.6042	50.3958		100	0		100	0
2018	4	A	I	80.3869	19.6131		40	60
2018	4	A	I	78.7141	21.2859		48	52
2018	4	A	I	79.5505	20.4495		44	56		44	56
2018	4	A	II	64.175	35.825		0	100
2018	4	A	II	60.0596	39.9404		0	100
2018	4	A	II	62.1173	37.8827		0	100		0	100
2018	4	A	III	76.7422	23.2578		40	60
2018	4	A	III	76.5824	23.4176		40	60
2018	4	A	III	76.6623	23.3377		38	62		39.3333	60.6667
2018	4	B	I	80.0737	19.9263		10	90
2018	4	B	I	79.0602	20.9398		23	77
2018	4	B	I	79.5669	20.4331		16	84		16.3333	83.6667
2018	4	B	II	74.3088	25.6912		0	100
2018	4	B	II	71.6821	28.3179		0	100
2018	4	B	II	72.9955	27.0045		0	100		0	100
2018	4	B	III	70.12	29.88		0	100
2018	4	B	III	67.6208	32.3792		0	100
2018	4	B	III	68.8704	31.1296		0	100		0	100
2018	4	C	I	78.0014	21.9986		30	70
2018	4	C	I	72.1598	27.8402		40	60
2018	4	C	I	75.0806	24.9194		35	65		35	65
2018	4	C	II	72.4183	27.5817		40	60
2018	4	C	II	67.8008	32.1992		30	70
2018	4	C	II	70.1095	29.8905		35	65		35	65
2018	4	C	III	73.395	26.605		0	100
2018	4	C	III	76.7761	23.2239		0	100
2018	4	C	III	75.0855	24.9145		0	100		0	100
2018	5	A	I	45.5407	54.4593		96	4
2018	5	A	I	46.0478	53.9522		98	2
2018	5	A	I	45.7942	54.2058		98	2		97.3333	2.66667
2018	5	A	II	47.4091	52.5909		100	0
2018	5	A	II	48.3761	51.6239		100	0
2018	5	A	II	47.8926	52.1074		100	0		100	0
2018	5	A	III	51.0772	48.9228		100	0
2018	5	A	III	52.2197	47.7803		97	3
2018	5	A	III	51.6485	48.3515		98	2		98.3333	1.66667
2018	5	B	I	53.582	46.418		98	2
2018	5	B	I	48.8936	51.1064		98	2
2018	5	B	I	51.2378	48.7622		96	4		97.3333	2.66667
2018	5	B	II	48.0896	51.9104		100	0
2018	5	B	II	48.1109	51.8891		98	0
2018	5	B	II	48.1002	51.8998		99	1		99	0.333333
2018	5	B	III	51.7164	48.2836		100	0
2018	5	B	III	49.4467	50.5533		95	5
2018	5	B	III	50.5816	49.4184		97	3		97.3333	2.66667
2018	5	C	I	47.4742	52.5258		96	4
2018	5	C	I	42.254	57.746		95	5
2018	5	C	I	44.8641	55.1359		97	3		96	4
2018	5	C	II	47.1801	52.8199		100	0
2018	5	C	II	42.417	57.583		100	0
2018	5	C	II	44.7985	55.2015		100	0		100	0
2018	5	C	III	49.6406	50.3594		100	0
2018	5	C	III	47.4417	52.5583		98	2
2018	5	C	III	48.5411	51.4589		99	1		99	1
2018	6	A	I	82.1302	17.8698		0	100
2018	6	A	I	77.3282	22.6718		0	100
2018	6	A	I	79.7292	20.2708		0	100		0	100
2018	6	A	II	70.8317	29.1683		0	100
2018	6	A	II	70.8065	29.1935		0	100
2018	6	A	II	70.8191	29.1809		0	100		0	100
2018	6	A	III	83.9119	16.0881		0	100
2018	6	A	III	89.4974	10.5026		0	100
2018	6	A	III	86.7047	13.2953		0	100		0	100
2018	6	B	I	76.9336	23.0664		0	100
2018	6	B	I	81.5359	18.4641		0	100
2018	6	B	I	79.2348	20.7652		0	100		0	100
2018	6	B	II	79.6067	20.3933		0	100
2018	6	B	II	78.3315	21.6685		0	100
2018	6	B	II	78.9691	21.0309		0	100		0	100
2018	6	B	III	79.8887	20.1113		0	100
2018	6	B	III	82.8838	17.1162		0	100
2018	6	B	III	81.3862	18.6138		0	100		0	100
2018	6	C	I	81.9352	18.0648		95	5
2018	6	C	I	76.6792	23.3208		100	0
2018	6	C	I	79.3072	20.6928		97	3		97.3333	2.66667
2018	6	C	II	79.875	20.125		20	80
2018	6	C	II	81.1542	18.8458		10	90
2018	6	C	II	80.5146	19.4854		15	85		15	85
2018	6	C	III	80.3396	19.6604		0	100
2018	6	C	III	79.9891	20.0109		0	100
2018	6	C	III	80.1644	19.8356		0	100		0	100
