# Supplementary material for: Effect of biological treatment used before harvesting and storage methods on the quality, health and microbial characteristics of unripe hazelnut in the husk (Corylus avellana L.)
Source: PeerJ. 2022 Jan 28;10:e12760. doi: 10.7717/peerj.12760 (PMC8802713; doi:10.7717/peerj.12760)
Supplement: Supplemental Information 3 [file peerj-10-12760-s003.xls]

## Sheet: Fig 2.
										Pathogens	brown leaf area in %
	brown leaf area in %	SE					brown leaf area in %	SE		Bac 1/2	1
Bac 1/2	8.66667	1.78312				Bac 1/2	8.66667	1.78312		Bac 1/2	5			49	20.6735	20.1726	2.8818	14.8792	26.4677
Bac 7/10	8.33333	1.66667				Bac 7/10	8.33333	1.66667		Bac 1/2	20		Bac 1/2	3	8.66667	10.0167	5.78312	-16.2161	33.5494	F. av 8/6	6.66667	****
Bac 8/12	6.66667	1.66667				Bac 8/12	6.66667	1.66667		Bac 7/10	10		Bac 7/10	3	8.33333	2.88675	1.66667	1.16225	15.5044	Bac 8/12	6.66667	****
Bac 2/4	7	6.50641				Bac 2/4	7	6.50641		Bac 7/10	10		Bac 8/12	3	6.66667	2.88675	1.66667	-0.504421	13.8378	Bac 2/4	7	****
Bac 6/9	15	2.88675				Bac 6/9	15	2.88675		Bac 7/10	5		Bac 2/4	3	7	11.2694	6.50641	-20.9948	34.9948	Bot 6	7	****
Bac 1/5	33.3333	12.0185				Bac 1/5	33.3333	12.0185		Bac 8/12	5		Bac 6/9	2	15	7.07107	5	-48.531	78.531	Bac 7/10	8.33333	****
Bac 7/9	37	27.0617				Bac 7/9	38	21.0713		Bac 8/12	5		Bac 1/5	3	33.3333	20.8167	12.0185	-18.3781	85.0448	Bac 1/2	8.66667	****
Bac 2/3	40	5.7735				Bac 2/3	40	5.7735		Bac 8/12	10		Bac 7/9	3	38	36.4966	21.0713	-52.6625	128.663	Bac 6/9	15	****	****
Bac 9/12	40	20				Bac 9/12	40	20		Bac 2/4	0		Bac 2/3	3	40	10	5.7735	15.1586	64.8414	Muc 3/3	16.6667	****	****
F. oxy 1	18.3333	12.4944				F. oxy 1	18.3333	12.4944		Bac 2/4	1		Bac 9/12	2	40	28.2843	20	-214.124	294.124	F av 8/1	17	****	****
F. av 8/7	20	15.2753				F. av 8/7	20	15.2753		Bac 2/4	20		F. oxy 1	3	18.3333	14.4338	8.33333	-17.5221	54.1888	F. oxy 1	18.3333	****	****
F. av 8/6	6.66667	1.66667				F. av 8/6	6.66667	1.66667		Bac 6/9	10		F. av 8/7	3	20	26.4575	15.2753	-45.7241	85.7241	F. av 8/7	20	****	****
F. av 8/1	17	8.5049				F. av 8/1	17	8.5049		Bac 6/9	20		F. av 8/6	3	6.66667	2.88675	1.66667	-0.504421	13.8378	Mon	23.3333	****	****
Mon 1	23.3333	6.66667				Mon 1	23.3333	6.66667		Bac 1/5	50		F av 8/1	3	17	14.7309	8.5049	-19.5936	53.5936	Bac 1/5	33.3333	****	****
Bot 6	7	3				Bot 6	7	3		Bac 1/5	40		Mon	3	23.3333	11.547	6.66667	-5.35102	52.0177	Bac 7/9	38	****	****
Bot 3/2	50	20.8167				Bot 3/2	50	20.8167		Bac 1/5	10		Bot 6	3	7	5.19615	3	-5.90796	19.908	Bac 2/3	40	****	****
Muc 3/3	16.6667	3.33333				Muc 3/3	16.6667	3.33333		Bac 7/9	20		Bot 3/2	3	50	36.0555	20.8167	-39.5669	139.567	Bac 9/12	40	****	****
										Bac 7/9	80		Muc 3/3	3	16.6667	5.7735	3.33333	2.32449	31.0088	Bot 3/2	50		****
										Bac 7/9	14
										Bac 2/3	50
										Bac 2/3	40
										Bac 2/3	30
										Bac 9/12	20
										Bac 9/12	60
										F. oxy 1	10
										F. oxy 1	35
										F. oxy 1	10
										F. av 8/7	10
										F. av 8/7	0
										F. av 8/7	50
										F. av 8/6	5
										F. av 8/6	5
										F. av 8/6	10
										F av 8/1	1
										F av 8/1	20
										F av 8/1	30
										Mon	10
										Mon	30
										Mon	30
										Bot 6	10
										Bot 6	10
										Bot 6	1
										Bot 3/2	60
										Bot 3/2	80
										Bot 3/2	10
										Muc 3/3	10
										Muc 3/3	20
										Muc 3/3	20
